# Supplementary material for: Establishing a database for sickle cell disease patient mapping and survival tracking: The sickle pan-african research consortium Nigeria example
Source: Frontiers journal article supplement (doi:10.3389/fgene.2022.1041462), 2022-11-04
Supplement: Data_Sheet_1.PDF [file Data_Sheet_1.PDF]

## Data Dictionary Codebook

12/10/2022 10:55pm

|                                          | #                           | Variable / Field Name     | Field Label<br><i>Field Note</i>                                         | Field Attributes (Field Type, Validation, Choices, Calculations, etc.)                                                                                                                                                                              |   |              |   |         |   |                             |   |            |   |          |   |         |
|------------------------------------------|-----------------------------|---------------------------|--------------------------------------------------------------------------|-----------------------------------------------------------------------------------------------------------------------------------------------------------------------------------------------------------------------------------------------------|---|--------------|---|---------|---|-----------------------------|---|------------|---|----------|---|---------|
| Instrument: <b>Screening</b> (screening) |                             |                           |                                                                          |                                                                                                                                                                                                                                                     |   |              |   |         |   |                             |   |            |   |          |   |         |
|                                          | 1                           | [ record_id ]             | Research Subject ID Research ID                                          | text                                                                                                                                                                                                                                                |   |              |   |         |   |                             |   |            |   |          |   |         |
|                                          | 2                           | [ date_today ]            | Visit Date (dd/mm/yyyy)                                                  | text (date_dmy)                                                                                                                                                                                                                                     |   |              |   |         |   |                             |   |            |   |          |   |         |
|                                          | 3                           | [ participant_number ]    | Participant Number<br><i>Site-specific ID eg. NG20184321 for Nigeria</i> | text                                                                                                                                                                                                                                                |   |              |   |         |   |                             |   |            |   |          |   |         |
|                                          | 4                           | [ scd_number ]            | SCD Number                                                               | text                                                                                                                                                                                                                                                |   |              |   |         |   |                             |   |            |   |          |   |         |
|                                          | 5                           | [ hospital_name ]         | Hospital Name                                                            | text                                                                                                                                                                                                                                                |   |              |   |         |   |                             |   |            |   |          |   |         |
|                                          | 6                           | [ medical_record_number ] | Medical Record Number (MRN)                                              | text                                                                                                                                                                                                                                                |   |              |   |         |   |                             |   |            |   |          |   |         |
|                                          | 7                           | [ first_name ]            | First Name                                                               | text, Identifier                                                                                                                                                                                                                                    |   |              |   |         |   |                             |   |            |   |          |   |         |
|                                          | 8                           | [ middle_name ]           | Middle Name                                                              | text, Identifier                                                                                                                                                                                                                                    |   |              |   |         |   |                             |   |            |   |          |   |         |
|                                          | 9                           | [ last_name ]             | Last Name                                                                | text, Identifier                                                                                                                                                                                                                                    |   |              |   |         |   |                             |   |            |   |          |   |         |
|                                          | 10                          | [ date_of_birth ]         | Date of Birth (dd/mm/yyyy)                                               | text (date_dmy)                                                                                                                                                                                                                                     |   |              |   |         |   |                             |   |            |   |          |   |         |
|                                          | 11                          | [ age ]                   | Age                                                                      | calc<br>Calculation: round(datediff([date_of_birth], [date_today], 'y', 'dmy'),0)<br>Custom alignment: RH                                                                                                                                           |   |              |   |         |   |                             |   |            |   |          |   |         |
|                                          | 12                          | [ gender ]                | Gender                                                                   | radio <table border="1"><tr><td>1</td><td>Male</td></tr><tr><td>2</td><td>Female</td></tr><tr><td>3</td><td>Refused</td></tr></table><br>Custom alignment: RH                                                                                       | 1 | Male         | 2 | Female  | 3 | Refused                     |   |            |   |          |   |         |
| 1                                        | Male                        |                           |                                                                          |                                                                                                                                                                                                                                                     |   |              |   |         |   |                             |   |            |   |          |   |         |
| 2                                        | Female                      |                           |                                                                          |                                                                                                                                                                                                                                                     |   |              |   |         |   |                             |   |            |   |          |   |         |
| 3                                        | Refused                     |                           |                                                                          |                                                                                                                                                                                                                                                     |   |              |   |         |   |                             |   |            |   |          |   |         |
|                                          | 13                          | [ marital_status ]        | Marital Status                                                           | radio <table border="1"><tr><td>1</td><td>Single</td></tr><tr><td>2</td><td>Married</td></tr><tr><td>3</td><td>Other</td></tr><tr><td>4</td><td>Cohabiting</td></tr><tr><td>5</td><td>Divorced</td></tr><tr><td>6</td><td>Widowed</td></tr></table> | 1 | Single       | 2 | Married | 3 | Other                       | 4 | Cohabiting | 5 | Divorced | 6 | Widowed |
| 1                                        | Single                      |                           |                                                                          |                                                                                                                                                                                                                                                     |   |              |   |         |   |                             |   |            |   |          |   |         |
| 2                                        | Married                     |                           |                                                                          |                                                                                                                                                                                                                                                     |   |              |   |         |   |                             |   |            |   |          |   |         |
| 3                                        | Other                       |                           |                                                                          |                                                                                                                                                                                                                                                     |   |              |   |         |   |                             |   |            |   |          |   |         |
| 4                                        | Cohabiting                  |                           |                                                                          |                                                                                                                                                                                                                                                     |   |              |   |         |   |                             |   |            |   |          |   |         |
| 5                                        | Divorced                    |                           |                                                                          |                                                                                                                                                                                                                                                     |   |              |   |         |   |                             |   |            |   |          |   |         |
| 6                                        | Widowed                     |                           |                                                                          |                                                                                                                                                                                                                                                     |   |              |   |         |   |                             |   |            |   |          |   |         |
|                                          | 14                          | [ religion ]              | Religion                                                                 | dropdown <table border="1"><tr><td>1</td><td>Christianity</td></tr><tr><td>2</td><td>Islam</td></tr><tr><td>3</td><td>African traditional beliefs</td></tr><tr><td>4</td><td>Others</td></tr></table>                                               | 1 | Christianity | 2 | Islam   | 3 | African traditional beliefs | 4 | Others     |   |          |   |         |
| 1                                        | Christianity                |                           |                                                                          |                                                                                                                                                                                                                                                     |   |              |   |         |   |                             |   |            |   |          |   |         |
| 2                                        | Islam                       |                           |                                                                          |                                                                                                                                                                                                                                                     |   |              |   |         |   |                             |   |            |   |          |   |         |
| 3                                        | African traditional beliefs |                           |                                                                          |                                                                                                                                                                                                                                                     |   |              |   |         |   |                             |   |            |   |          |   |         |
| 4                                        | Others                      |                           |                                                                          |                                                                                                                                                                                                                                                     |   |              |   |         |   |                             |   |            |   |          |   |         |
|                                          | 15                          | [ tribe ]                 | Tribe                                                                    | text                                                                                                                                                                                                                                                |   |              |   |         |   |                             |   |            |   |          |   |         |

|    |                                 |                               |                                                               |                                                                                                                                                                                                                                                                                                                                                                                                                                                                                                                                                                                                                                                                                                                                                                                                                                                                                                                                                                                                                                                                                                                                                                                                                                                                                                                                                                        |   |      |   |         |   |         |   |           |   |        |   |         |   |       |   |       |   |             |    |       |    |        |    |       |    |     |    |       |    |       |    |     |    |        |    |        |    |      |    |         |    |       |    |      |    |       |    |       |    |          |    |       |    |      |    |      |    |      |    |     |    |         |    |        |    |        |    |        |    |      |    |         |    |                                 |
|----|---------------------------------|-------------------------------|---------------------------------------------------------------|------------------------------------------------------------------------------------------------------------------------------------------------------------------------------------------------------------------------------------------------------------------------------------------------------------------------------------------------------------------------------------------------------------------------------------------------------------------------------------------------------------------------------------------------------------------------------------------------------------------------------------------------------------------------------------------------------------------------------------------------------------------------------------------------------------------------------------------------------------------------------------------------------------------------------------------------------------------------------------------------------------------------------------------------------------------------------------------------------------------------------------------------------------------------------------------------------------------------------------------------------------------------------------------------------------------------------------------------------------------------|---|------|---|---------|---|---------|---|-----------|---|--------|---|---------|---|-------|---|-------|---|-------------|----|-------|----|--------|----|-------|----|-----|----|-------|----|-------|----|-----|----|--------|----|--------|----|------|----|---------|----|-------|----|------|----|-------|----|-------|----|----------|----|-------|----|------|----|------|----|------|----|-----|----|---------|----|--------|----|--------|----|--------|----|------|----|---------|----|---------------------------------|
|    | 16                              | [ state_of_origin ]           | State of Origin                                               | dropdown <table><tr><td>1</td><td>Abia</td></tr><tr><td>2</td><td>Adamawa</td></tr><tr><td>3</td><td>Anambra</td></tr><tr><td>4</td><td>Akwa Ibom</td></tr><tr><td>5</td><td>Bauchi</td></tr><tr><td>6</td><td>Bayelsa</td></tr><tr><td>7</td><td>Benue</td></tr><tr><td>8</td><td>Borno</td></tr><tr><td>9</td><td>Cross River</td></tr><tr><td>10</td><td>Delta</td></tr><tr><td>11</td><td>Ebonyi</td></tr><tr><td>12</td><td>Enugu</td></tr><tr><td>13</td><td>Edo</td></tr><tr><td>14</td><td>Ekiti</td></tr><tr><td>15</td><td>Gombe</td></tr><tr><td>16</td><td>Imo</td></tr><tr><td>17</td><td>Jigawa</td></tr><tr><td>18</td><td>Kaduna</td></tr><tr><td>19</td><td>Kano</td></tr><tr><td>20</td><td>Katsina</td></tr><tr><td>21</td><td>Kebbi</td></tr><tr><td>22</td><td>Kogi</td></tr><tr><td>23</td><td>Kwara</td></tr><tr><td>24</td><td>Lagos</td></tr><tr><td>25</td><td>Nasarawa</td></tr><tr><td>26</td><td>Niger</td></tr><tr><td>27</td><td>Ogun</td></tr><tr><td>28</td><td>Ondo</td></tr><tr><td>29</td><td>Osun</td></tr><tr><td>30</td><td>Oyo</td></tr><tr><td>31</td><td>Plateau</td></tr><tr><td>32</td><td>Rivers</td></tr><tr><td>33</td><td>Sokoto</td></tr><tr><td>34</td><td>Taraba</td></tr><tr><td>35</td><td>Yobe</td></tr><tr><td>36</td><td>Zamfara</td></tr><tr><td>37</td><td>Federal Capital Territory (FCT)</td></tr></table> | 1 | Abia | 2 | Adamawa | 3 | Anambra | 4 | Akwa Ibom | 5 | Bauchi | 6 | Bayelsa | 7 | Benue | 8 | Borno | 9 | Cross River | 10 | Delta | 11 | Ebonyi | 12 | Enugu | 13 | Edo | 14 | Ekiti | 15 | Gombe | 16 | Imo | 17 | Jigawa | 18 | Kaduna | 19 | Kano | 20 | Katsina | 21 | Kebbi | 22 | Kogi | 23 | Kwara | 24 | Lagos | 25 | Nasarawa | 26 | Niger | 27 | Ogun | 28 | Ondo | 29 | Osun | 30 | Oyo | 31 | Plateau | 32 | Rivers | 33 | Sokoto | 34 | Taraba | 35 | Yobe | 36 | Zamfara | 37 | Federal Capital Territory (FCT) |
| 1  | Abia                            |                               |                                                               |                                                                                                                                                                                                                                                                                                                                                                                                                                                                                                                                                                                                                                                                                                                                                                                                                                                                                                                                                                                                                                                                                                                                                                                                                                                                                                                                                                        |   |      |   |         |   |         |   |           |   |        |   |         |   |       |   |       |   |             |    |       |    |        |    |       |    |     |    |       |    |       |    |     |    |        |    |        |    |      |    |         |    |       |    |      |    |       |    |       |    |          |    |       |    |      |    |      |    |      |    |     |    |         |    |        |    |        |    |        |    |      |    |         |    |                                 |
| 2  | Adamawa                         |                               |                                                               |                                                                                                                                                                                                                                                                                                                                                                                                                                                                                                                                                                                                                                                                                                                                                                                                                                                                                                                                                                                                                                                                                                                                                                                                                                                                                                                                                                        |   |      |   |         |   |         |   |           |   |        |   |         |   |       |   |       |   |             |    |       |    |        |    |       |    |     |    |       |    |       |    |     |    |        |    |        |    |      |    |         |    |       |    |      |    |       |    |       |    |          |    |       |    |      |    |      |    |      |    |     |    |         |    |        |    |        |    |        |    |      |    |         |    |                                 |
| 3  | Anambra                         |                               |                                                               |                                                                                                                                                                                                                                                                                                                                                                                                                                                                                                                                                                                                                                                                                                                                                                                                                                                                                                                                                                                                                                                                                                                                                                                                                                                                                                                                                                        |   |      |   |         |   |         |   |           |   |        |   |         |   |       |   |       |   |             |    |       |    |        |    |       |    |     |    |       |    |       |    |     |    |        |    |        |    |      |    |         |    |       |    |      |    |       |    |       |    |          |    |       |    |      |    |      |    |      |    |     |    |         |    |        |    |        |    |        |    |      |    |         |    |                                 |
| 4  | Akwa Ibom                       |                               |                                                               |                                                                                                                                                                                                                                                                                                                                                                                                                                                                                                                                                                                                                                                                                                                                                                                                                                                                                                                                                                                                                                                                                                                                                                                                                                                                                                                                                                        |   |      |   |         |   |         |   |           |   |        |   |         |   |       |   |       |   |             |    |       |    |        |    |       |    |     |    |       |    |       |    |     |    |        |    |        |    |      |    |         |    |       |    |      |    |       |    |       |    |          |    |       |    |      |    |      |    |      |    |     |    |         |    |        |    |        |    |        |    |      |    |         |    |                                 |
| 5  | Bauchi                          |                               |                                                               |                                                                                                                                                                                                                                                                                                                                                                                                                                                                                                                                                                                                                                                                                                                                                                                                                                                                                                                                                                                                                                                                                                                                                                                                                                                                                                                                                                        |   |      |   |         |   |         |   |           |   |        |   |         |   |       |   |       |   |             |    |       |    |        |    |       |    |     |    |       |    |       |    |     |    |        |    |        |    |      |    |         |    |       |    |      |    |       |    |       |    |          |    |       |    |      |    |      |    |      |    |     |    |         |    |        |    |        |    |        |    |      |    |         |    |                                 |
| 6  | Bayelsa                         |                               |                                                               |                                                                                                                                                                                                                                                                                                                                                                                                                                                                                                                                                                                                                                                                                                                                                                                                                                                                                                                                                                                                                                                                                                                                                                                                                                                                                                                                                                        |   |      |   |         |   |         |   |           |   |        |   |         |   |       |   |       |   |             |    |       |    |        |    |       |    |     |    |       |    |       |    |     |    |        |    |        |    |      |    |         |    |       |    |      |    |       |    |       |    |          |    |       |    |      |    |      |    |      |    |     |    |         |    |        |    |        |    |        |    |      |    |         |    |                                 |
| 7  | Benue                           |                               |                                                               |                                                                                                                                                                                                                                                                                                                                                                                                                                                                                                                                                                                                                                                                                                                                                                                                                                                                                                                                                                                                                                                                                                                                                                                                                                                                                                                                                                        |   |      |   |         |   |         |   |           |   |        |   |         |   |       |   |       |   |             |    |       |    |        |    |       |    |     |    |       |    |       |    |     |    |        |    |        |    |      |    |         |    |       |    |      |    |       |    |       |    |          |    |       |    |      |    |      |    |      |    |     |    |         |    |        |    |        |    |        |    |      |    |         |    |                                 |
| 8  | Borno                           |                               |                                                               |                                                                                                                                                                                                                                                                                                                                                                                                                                                                                                                                                                                                                                                                                                                                                                                                                                                                                                                                                                                                                                                                                                                                                                                                                                                                                                                                                                        |   |      |   |         |   |         |   |           |   |        |   |         |   |       |   |       |   |             |    |       |    |        |    |       |    |     |    |       |    |       |    |     |    |        |    |        |    |      |    |         |    |       |    |      |    |       |    |       |    |          |    |       |    |      |    |      |    |      |    |     |    |         |    |        |    |        |    |        |    |      |    |         |    |                                 |
| 9  | Cross River                     |                               |                                                               |                                                                                                                                                                                                                                                                                                                                                                                                                                                                                                                                                                                                                                                                                                                                                                                                                                                                                                                                                                                                                                                                                                                                                                                                                                                                                                                                                                        |   |      |   |         |   |         |   |           |   |        |   |         |   |       |   |       |   |             |    |       |    |        |    |       |    |     |    |       |    |       |    |     |    |        |    |        |    |      |    |         |    |       |    |      |    |       |    |       |    |          |    |       |    |      |    |      |    |      |    |     |    |         |    |        |    |        |    |        |    |      |    |         |    |                                 |
| 10 | Delta                           |                               |                                                               |                                                                                                                                                                                                                                                                                                                                                                                                                                                                                                                                                                                                                                                                                                                                                                                                                                                                                                                                                                                                                                                                                                                                                                                                                                                                                                                                                                        |   |      |   |         |   |         |   |           |   |        |   |         |   |       |   |       |   |             |    |       |    |        |    |       |    |     |    |       |    |       |    |     |    |        |    |        |    |      |    |         |    |       |    |      |    |       |    |       |    |          |    |       |    |      |    |      |    |      |    |     |    |         |    |        |    |        |    |        |    |      |    |         |    |                                 |
| 11 | Ebonyi                          |                               |                                                               |                                                                                                                                                                                                                                                                                                                                                                                                                                                                                                                                                                                                                                                                                                                                                                                                                                                                                                                                                                                                                                                                                                                                                                                                                                                                                                                                                                        |   |      |   |         |   |         |   |           |   |        |   |         |   |       |   |       |   |             |    |       |    |        |    |       |    |     |    |       |    |       |    |     |    |        |    |        |    |      |    |         |    |       |    |      |    |       |    |       |    |          |    |       |    |      |    |      |    |      |    |     |    |         |    |        |    |        |    |        |    |      |    |         |    |                                 |
| 12 | Enugu                           |                               |                                                               |                                                                                                                                                                                                                                                                                                                                                                                                                                                                                                                                                                                                                                                                                                                                                                                                                                                                                                                                                                                                                                                                                                                                                                                                                                                                                                                                                                        |   |      |   |         |   |         |   |           |   |        |   |         |   |       |   |       |   |             |    |       |    |        |    |       |    |     |    |       |    |       |    |     |    |        |    |        |    |      |    |         |    |       |    |      |    |       |    |       |    |          |    |       |    |      |    |      |    |      |    |     |    |         |    |        |    |        |    |        |    |      |    |         |    |                                 |
| 13 | Edo                             |                               |                                                               |                                                                                                                                                                                                                                                                                                                                                                                                                                                                                                                                                                                                                                                                                                                                                                                                                                                                                                                                                                                                                                                                                                                                                                                                                                                                                                                                                                        |   |      |   |         |   |         |   |           |   |        |   |         |   |       |   |       |   |             |    |       |    |        |    |       |    |     |    |       |    |       |    |     |    |        |    |        |    |      |    |         |    |       |    |      |    |       |    |       |    |          |    |       |    |      |    |      |    |      |    |     |    |         |    |        |    |        |    |        |    |      |    |         |    |                                 |
| 14 | Ekiti                           |                               |                                                               |                                                                                                                                                                                                                                                                                                                                                                                                                                                                                                                                                                                                                                                                                                                                                                                                                                                                                                                                                                                                                                                                                                                                                                                                                                                                                                                                                                        |   |      |   |         |   |         |   |           |   |        |   |         |   |       |   |       |   |             |    |       |    |        |    |       |    |     |    |       |    |       |    |     |    |        |    |        |    |      |    |         |    |       |    |      |    |       |    |       |    |          |    |       |    |      |    |      |    |      |    |     |    |         |    |        |    |        |    |        |    |      |    |         |    |                                 |
| 15 | Gombe                           |                               |                                                               |                                                                                                                                                                                                                                                                                                                                                                                                                                                                                                                                                                                                                                                                                                                                                                                                                                                                                                                                                                                                                                                                                                                                                                                                                                                                                                                                                                        |   |      |   |         |   |         |   |           |   |        |   |         |   |       |   |       |   |             |    |       |    |        |    |       |    |     |    |       |    |       |    |     |    |        |    |        |    |      |    |         |    |       |    |      |    |       |    |       |    |          |    |       |    |      |    |      |    |      |    |     |    |         |    |        |    |        |    |        |    |      |    |         |    |                                 |
| 16 | Imo                             |                               |                                                               |                                                                                                                                                                                                                                                                                                                                                                                                                                                                                                                                                                                                                                                                                                                                                                                                                                                                                                                                                                                                                                                                                                                                                                                                                                                                                                                                                                        |   |      |   |         |   |         |   |           |   |        |   |         |   |       |   |       |   |             |    |       |    |        |    |       |    |     |    |       |    |       |    |     |    |        |    |        |    |      |    |         |    |       |    |      |    |       |    |       |    |          |    |       |    |      |    |      |    |      |    |     |    |         |    |        |    |        |    |        |    |      |    |         |    |                                 |
| 17 | Jigawa                          |                               |                                                               |                                                                                                                                                                                                                                                                                                                                                                                                                                                                                                                                                                                                                                                                                                                                                                                                                                                                                                                                                                                                                                                                                                                                                                                                                                                                                                                                                                        |   |      |   |         |   |         |   |           |   |        |   |         |   |       |   |       |   |             |    |       |    |        |    |       |    |     |    |       |    |       |    |     |    |        |    |        |    |      |    |         |    |       |    |      |    |       |    |       |    |          |    |       |    |      |    |      |    |      |    |     |    |         |    |        |    |        |    |        |    |      |    |         |    |                                 |
| 18 | Kaduna                          |                               |                                                               |                                                                                                                                                                                                                                                                                                                                                                                                                                                                                                                                                                                                                                                                                                                                                                                                                                                                                                                                                                                                                                                                                                                                                                                                                                                                                                                                                                        |   |      |   |         |   |         |   |           |   |        |   |         |   |       |   |       |   |             |    |       |    |        |    |       |    |     |    |       |    |       |    |     |    |        |    |        |    |      |    |         |    |       |    |      |    |       |    |       |    |          |    |       |    |      |    |      |    |      |    |     |    |         |    |        |    |        |    |        |    |      |    |         |    |                                 |
| 19 | Kano                            |                               |                                                               |                                                                                                                                                                                                                                                                                                                                                                                                                                                                                                                                                                                                                                                                                                                                                                                                                                                                                                                                                                                                                                                                                                                                                                                                                                                                                                                                                                        |   |      |   |         |   |         |   |           |   |        |   |         |   |       |   |       |   |             |    |       |    |        |    |       |    |     |    |       |    |       |    |     |    |        |    |        |    |      |    |         |    |       |    |      |    |       |    |       |    |          |    |       |    |      |    |      |    |      |    |     |    |         |    |        |    |        |    |        |    |      |    |         |    |                                 |
| 20 | Katsina                         |                               |                                                               |                                                                                                                                                                                                                                                                                                                                                                                                                                                                                                                                                                                                                                                                                                                                                                                                                                                                                                                                                                                                                                                                                                                                                                                                                                                                                                                                                                        |   |      |   |         |   |         |   |           |   |        |   |         |   |       |   |       |   |             |    |       |    |        |    |       |    |     |    |       |    |       |    |     |    |        |    |        |    |      |    |         |    |       |    |      |    |       |    |       |    |          |    |       |    |      |    |      |    |      |    |     |    |         |    |        |    |        |    |        |    |      |    |         |    |                                 |
| 21 | Kebbi                           |                               |                                                               |                                                                                                                                                                                                                                                                                                                                                                                                                                                                                                                                                                                                                                                                                                                                                                                                                                                                                                                                                                                                                                                                                                                                                                                                                                                                                                                                                                        |   |      |   |         |   |         |   |           |   |        |   |         |   |       |   |       |   |             |    |       |    |        |    |       |    |     |    |       |    |       |    |     |    |        |    |        |    |      |    |         |    |       |    |      |    |       |    |       |    |          |    |       |    |      |    |      |    |      |    |     |    |         |    |        |    |        |    |        |    |      |    |         |    |                                 |
| 22 | Kogi                            |                               |                                                               |                                                                                                                                                                                                                                                                                                                                                                                                                                                                                                                                                                                                                                                                                                                                                                                                                                                                                                                                                                                                                                                                                                                                                                                                                                                                                                                                                                        |   |      |   |         |   |         |   |           |   |        |   |         |   |       |   |       |   |             |    |       |    |        |    |       |    |     |    |       |    |       |    |     |    |        |    |        |    |      |    |         |    |       |    |      |    |       |    |       |    |          |    |       |    |      |    |      |    |      |    |     |    |         |    |        |    |        |    |        |    |      |    |         |    |                                 |
| 23 | Kwara                           |                               |                                                               |                                                                                                                                                                                                                                                                                                                                                                                                                                                                                                                                                                                                                                                                                                                                                                                                                                                                                                                                                                                                                                                                                                                                                                                                                                                                                                                                                                        |   |      |   |         |   |         |   |           |   |        |   |         |   |       |   |       |   |             |    |       |    |        |    |       |    |     |    |       |    |       |    |     |    |        |    |        |    |      |    |         |    |       |    |      |    |       |    |       |    |          |    |       |    |      |    |      |    |      |    |     |    |         |    |        |    |        |    |        |    |      |    |         |    |                                 |
| 24 | Lagos                           |                               |                                                               |                                                                                                                                                                                                                                                                                                                                                                                                                                                                                                                                                                                                                                                                                                                                                                                                                                                                                                                                                                                                                                                                                                                                                                                                                                                                                                                                                                        |   |      |   |         |   |         |   |           |   |        |   |         |   |       |   |       |   |             |    |       |    |        |    |       |    |     |    |       |    |       |    |     |    |        |    |        |    |      |    |         |    |       |    |      |    |       |    |       |    |          |    |       |    |      |    |      |    |      |    |     |    |         |    |        |    |        |    |        |    |      |    |         |    |                                 |
| 25 | Nasarawa                        |                               |                                                               |                                                                                                                                                                                                                                                                                                                                                                                                                                                                                                                                                                                                                                                                                                                                                                                                                                                                                                                                                                                                                                                                                                                                                                                                                                                                                                                                                                        |   |      |   |         |   |         |   |           |   |        |   |         |   |       |   |       |   |             |    |       |    |        |    |       |    |     |    |       |    |       |    |     |    |        |    |        |    |      |    |         |    |       |    |      |    |       |    |       |    |          |    |       |    |      |    |      |    |      |    |     |    |         |    |        |    |        |    |        |    |      |    |         |    |                                 |
| 26 | Niger                           |                               |                                                               |                                                                                                                                                                                                                                                                                                                                                                                                                                                                                                                                                                                                                                                                                                                                                                                                                                                                                                                                                                                                                                                                                                                                                                                                                                                                                                                                                                        |   |      |   |         |   |         |   |           |   |        |   |         |   |       |   |       |   |             |    |       |    |        |    |       |    |     |    |       |    |       |    |     |    |        |    |        |    |      |    |         |    |       |    |      |    |       |    |       |    |          |    |       |    |      |    |      |    |      |    |     |    |         |    |        |    |        |    |        |    |      |    |         |    |                                 |
| 27 | Ogun                            |                               |                                                               |                                                                                                                                                                                                                                                                                                                                                                                                                                                                                                                                                                                                                                                                                                                                                                                                                                                                                                                                                                                                                                                                                                                                                                                                                                                                                                                                                                        |   |      |   |         |   |         |   |           |   |        |   |         |   |       |   |       |   |             |    |       |    |        |    |       |    |     |    |       |    |       |    |     |    |        |    |        |    |      |    |         |    |       |    |      |    |       |    |       |    |          |    |       |    |      |    |      |    |      |    |     |    |         |    |        |    |        |    |        |    |      |    |         |    |                                 |
| 28 | Ondo                            |                               |                                                               |                                                                                                                                                                                                                                                                                                                                                                                                                                                                                                                                                                                                                                                                                                                                                                                                                                                                                                                                                                                                                                                                                                                                                                                                                                                                                                                                                                        |   |      |   |         |   |         |   |           |   |        |   |         |   |       |   |       |   |             |    |       |    |        |    |       |    |     |    |       |    |       |    |     |    |        |    |        |    |      |    |         |    |       |    |      |    |       |    |       |    |          |    |       |    |      |    |      |    |      |    |     |    |         |    |        |    |        |    |        |    |      |    |         |    |                                 |
| 29 | Osun                            |                               |                                                               |                                                                                                                                                                                                                                                                                                                                                                                                                                                                                                                                                                                                                                                                                                                                                                                                                                                                                                                                                                                                                                                                                                                                                                                                                                                                                                                                                                        |   |      |   |         |   |         |   |           |   |        |   |         |   |       |   |       |   |             |    |       |    |        |    |       |    |     |    |       |    |       |    |     |    |        |    |        |    |      |    |         |    |       |    |      |    |       |    |       |    |          |    |       |    |      |    |      |    |      |    |     |    |         |    |        |    |        |    |        |    |      |    |         |    |                                 |
| 30 | Oyo                             |                               |                                                               |                                                                                                                                                                                                                                                                                                                                                                                                                                                                                                                                                                                                                                                                                                                                                                                                                                                                                                                                                                                                                                                                                                                                                                                                                                                                                                                                                                        |   |      |   |         |   |         |   |           |   |        |   |         |   |       |   |       |   |             |    |       |    |        |    |       |    |     |    |       |    |       |    |     |    |        |    |        |    |      |    |         |    |       |    |      |    |       |    |       |    |          |    |       |    |      |    |      |    |      |    |     |    |         |    |        |    |        |    |        |    |      |    |         |    |                                 |
| 31 | Plateau                         |                               |                                                               |                                                                                                                                                                                                                                                                                                                                                                                                                                                                                                                                                                                                                                                                                                                                                                                                                                                                                                                                                                                                                                                                                                                                                                                                                                                                                                                                                                        |   |      |   |         |   |         |   |           |   |        |   |         |   |       |   |       |   |             |    |       |    |        |    |       |    |     |    |       |    |       |    |     |    |        |    |        |    |      |    |         |    |       |    |      |    |       |    |       |    |          |    |       |    |      |    |      |    |      |    |     |    |         |    |        |    |        |    |        |    |      |    |         |    |                                 |
| 32 | Rivers                          |                               |                                                               |                                                                                                                                                                                                                                                                                                                                                                                                                                                                                                                                                                                                                                                                                                                                                                                                                                                                                                                                                                                                                                                                                                                                                                                                                                                                                                                                                                        |   |      |   |         |   |         |   |           |   |        |   |         |   |       |   |       |   |             |    |       |    |        |    |       |    |     |    |       |    |       |    |     |    |        |    |        |    |      |    |         |    |       |    |      |    |       |    |       |    |          |    |       |    |      |    |      |    |      |    |     |    |         |    |        |    |        |    |        |    |      |    |         |    |                                 |
| 33 | Sokoto                          |                               |                                                               |                                                                                                                                                                                                                                                                                                                                                                                                                                                                                                                                                                                                                                                                                                                                                                                                                                                                                                                                                                                                                                                                                                                                                                                                                                                                                                                                                                        |   |      |   |         |   |         |   |           |   |        |   |         |   |       |   |       |   |             |    |       |    |        |    |       |    |     |    |       |    |       |    |     |    |        |    |        |    |      |    |         |    |       |    |      |    |       |    |       |    |          |    |       |    |      |    |      |    |      |    |     |    |         |    |        |    |        |    |        |    |      |    |         |    |                                 |
| 34 | Taraba                          |                               |                                                               |                                                                                                                                                                                                                                                                                                                                                                                                                                                                                                                                                                                                                                                                                                                                                                                                                                                                                                                                                                                                                                                                                                                                                                                                                                                                                                                                                                        |   |      |   |         |   |         |   |           |   |        |   |         |   |       |   |       |   |             |    |       |    |        |    |       |    |     |    |       |    |       |    |     |    |        |    |        |    |      |    |         |    |       |    |      |    |       |    |       |    |          |    |       |    |      |    |      |    |      |    |     |    |         |    |        |    |        |    |        |    |      |    |         |    |                                 |
| 35 | Yobe                            |                               |                                                               |                                                                                                                                                                                                                                                                                                                                                                                                                                                                                                                                                                                                                                                                                                                                                                                                                                                                                                                                                                                                                                                                                                                                                                                                                                                                                                                                                                        |   |      |   |         |   |         |   |           |   |        |   |         |   |       |   |       |   |             |    |       |    |        |    |       |    |     |    |       |    |       |    |     |    |        |    |        |    |      |    |         |    |       |    |      |    |       |    |       |    |          |    |       |    |      |    |      |    |      |    |     |    |         |    |        |    |        |    |        |    |      |    |         |    |                                 |
| 36 | Zamfara                         |                               |                                                               |                                                                                                                                                                                                                                                                                                                                                                                                                                                                                                                                                                                                                                                                                                                                                                                                                                                                                                                                                                                                                                                                                                                                                                                                                                                                                                                                                                        |   |      |   |         |   |         |   |           |   |        |   |         |   |       |   |       |   |             |    |       |    |        |    |       |    |     |    |       |    |       |    |     |    |        |    |        |    |      |    |         |    |       |    |      |    |       |    |       |    |          |    |       |    |      |    |      |    |      |    |     |    |         |    |        |    |        |    |        |    |      |    |         |    |                                 |
| 37 | Federal Capital Territory (FCT) |                               |                                                               |                                                                                                                                                                                                                                                                                                                                                                                                                                                                                                                                                                                                                                                                                                                                                                                                                                                                                                                                                                                                                                                                                                                                                                                                                                                                                                                                                                        |   |      |   |         |   |         |   |           |   |        |   |         |   |       |   |       |   |             |    |       |    |        |    |       |    |     |    |       |    |       |    |     |    |        |    |        |    |      |    |         |    |       |    |      |    |       |    |       |    |          |    |       |    |      |    |      |    |      |    |     |    |         |    |        |    |        |    |        |    |      |    |         |    |                                 |
|    | 17                              | [ lga ]                       | LGA                                                           | text                                                                                                                                                                                                                                                                                                                                                                                                                                                                                                                                                                                                                                                                                                                                                                                                                                                                                                                                                                                                                                                                                                                                                                                                                                                                                                                                                                   |   |      |   |         |   |         |   |           |   |        |   |         |   |       |   |       |   |             |    |       |    |        |    |       |    |     |    |       |    |       |    |     |    |        |    |        |    |      |    |         |    |       |    |      |    |       |    |       |    |          |    |       |    |      |    |      |    |      |    |     |    |         |    |        |    |        |    |        |    |      |    |         |    |                                 |
|    | 18                              | [ place_of_birth ]            | Place of Birth                                                | text                                                                                                                                                                                                                                                                                                                                                                                                                                                                                                                                                                                                                                                                                                                                                                                                                                                                                                                                                                                                                                                                                                                                                                                                                                                                                                                                                                   |   |      |   |         |   |         |   |           |   |        |   |         |   |       |   |       |   |             |    |       |    |        |    |       |    |     |    |       |    |       |    |     |    |        |    |        |    |      |    |         |    |       |    |      |    |       |    |       |    |          |    |       |    |      |    |      |    |      |    |     |    |         |    |        |    |        |    |        |    |      |    |         |    |                                 |
|    | 19                              | [ year_of_diagnosis ]         | Section Header: <i>Diagnosis Details</i><br>Year of Diagnosis | text (integer, Min: 1900, Max: 2100)                                                                                                                                                                                                                                                                                                                                                                                                                                                                                                                                                                                                                                                                                                                                                                                                                                                                                                                                                                                                                                                                                                                                                                                                                                                                                                                                   |   |      |   |         |   |         |   |           |   |        |   |         |   |       |   |       |   |             |    |       |    |        |    |       |    |     |    |       |    |       |    |     |    |        |    |        |    |      |    |         |    |       |    |      |    |       |    |       |    |          |    |       |    |      |    |      |    |      |    |     |    |         |    |        |    |        |    |        |    |      |    |         |    |                                 |
|    | 20                              | [ scd_test_result_ss_sbthal ] | SCD Test Result (SS/SBThal/SC/CC)                             | radio <table><tr><td>1</td><td>SS</td></tr><tr><td>2</td><td>SBThal</td></tr><tr><td>3</td><td>SC</td></tr><tr><td>4</td><td>CC</td></tr></table><br>Custom alignment: RH                                                                                                                                                                                                                                                                                                                                                                                                                                                                                                                                                                                                                                                                                                                                                                                                                                                                                                                                                                                                                                                                                                                                                                                              | 1 | SS   | 2 | SBThal  | 3 | SC      | 4 | CC        |   |        |   |         |   |       |   |       |   |             |    |       |    |        |    |       |    |     |    |       |    |       |    |     |    |        |    |        |    |      |    |         |    |       |    |      |    |       |    |       |    |          |    |       |    |      |    |      |    |      |    |     |    |         |    |        |    |        |    |        |    |      |    |         |    |                                 |
| 1  | SS                              |                               |                                                               |                                                                                                                                                                                                                                                                                                                                                                                                                                                                                                                                                                                                                                                                                                                                                                                                                                                                                                                                                                                                                                                                                                                                                                                                                                                                                                                                                                        |   |      |   |         |   |         |   |           |   |        |   |         |   |       |   |       |   |             |    |       |    |        |    |       |    |     |    |       |    |       |    |     |    |        |    |        |    |      |    |         |    |       |    |      |    |       |    |       |    |          |    |       |    |      |    |      |    |      |    |     |    |         |    |        |    |        |    |        |    |      |    |         |    |                                 |
| 2  | SBThal                          |                               |                                                               |                                                                                                                                                                                                                                                                                                                                                                                                                                                                                                                                                                                                                                                                                                                                                                                                                                                                                                                                                                                                                                                                                                                                                                                                                                                                                                                                                                        |   |      |   |         |   |         |   |           |   |        |   |         |   |       |   |       |   |             |    |       |    |        |    |       |    |     |    |       |    |       |    |     |    |        |    |        |    |      |    |         |    |       |    |      |    |       |    |       |    |          |    |       |    |      |    |      |    |      |    |     |    |         |    |        |    |        |    |        |    |      |    |         |    |                                 |
| 3  | SC                              |                               |                                                               |                                                                                                                                                                                                                                                                                                                                                                                                                                                                                                                                                                                                                                                                                                                                                                                                                                                                                                                                                                                                                                                                                                                                                                                                                                                                                                                                                                        |   |      |   |         |   |         |   |           |   |        |   |         |   |       |   |       |   |             |    |       |    |        |    |       |    |     |    |       |    |       |    |     |    |        |    |        |    |      |    |         |    |       |    |      |    |       |    |       |    |          |    |       |    |      |    |      |    |      |    |     |    |         |    |        |    |        |    |        |    |      |    |         |    |                                 |
| 4  | CC                              |                               |                                                               |                                                                                                                                                                                                                                                                                                                                                                                                                                                                                                                                                                                                                                                                                                                                                                                                                                                                                                                                                                                                                                                                                                                                                                                                                                                                                                                                                                        |   |      |   |         |   |         |   |           |   |        |   |         |   |       |   |       |   |             |    |       |    |        |    |       |    |     |    |       |    |       |    |     |    |        |    |        |    |      |    |         |    |       |    |      |    |       |    |       |    |          |    |       |    |      |    |      |    |      |    |     |    |         |    |        |    |        |    |        |    |      |    |         |    |                                 |

|    |                                                     |                                                                |                                                                                                                                                                                                                                                                            |   |     |   |    |   |               |   |                           |   |    |   |    |   |     |   |     |
|----|-----------------------------------------------------|----------------------------------------------------------------|----------------------------------------------------------------------------------------------------------------------------------------------------------------------------------------------------------------------------------------------------------------------------|---|-----|---|----|---|---------------|---|---------------------------|---|----|---|----|---|-----|---|-----|
| 21 | [ <b>abo_blood_group</b> ]                          | ABO Blood Group                                                | dropdown <table><tr><td>1</td><td>A+</td></tr><tr><td>2</td><td>A-</td></tr><tr><td>3</td><td>B+</td></tr><tr><td>4</td><td>B-</td></tr><tr><td>5</td><td>O+</td></tr><tr><td>6</td><td>O-</td></tr><tr><td>7</td><td>AB+</td></tr><tr><td>8</td><td>AB-</td></tr></table> | 1 | A+  | 2 | A- | 3 | B+            | 4 | B-                        | 5 | O+ | 6 | O- | 7 | AB+ | 8 | AB- |
| 1  | A+                                                  |                                                                |                                                                                                                                                                                                                                                                            |   |     |   |    |   |               |   |                           |   |    |   |    |   |     |   |     |
| 2  | A-                                                  |                                                                |                                                                                                                                                                                                                                                                            |   |     |   |    |   |               |   |                           |   |    |   |    |   |     |   |     |
| 3  | B+                                                  |                                                                |                                                                                                                                                                                                                                                                            |   |     |   |    |   |               |   |                           |   |    |   |    |   |     |   |     |
| 4  | B-                                                  |                                                                |                                                                                                                                                                                                                                                                            |   |     |   |    |   |               |   |                           |   |    |   |    |   |     |   |     |
| 5  | O+                                                  |                                                                |                                                                                                                                                                                                                                                                            |   |     |   |    |   |               |   |                           |   |    |   |    |   |     |   |     |
| 6  | O-                                                  |                                                                |                                                                                                                                                                                                                                                                            |   |     |   |    |   |               |   |                           |   |    |   |    |   |     |   |     |
| 7  | AB+                                                 |                                                                |                                                                                                                                                                                                                                                                            |   |     |   |    |   |               |   |                           |   |    |   |    |   |     |   |     |
| 8  | AB-                                                 |                                                                |                                                                                                                                                                                                                                                                            |   |     |   |    |   |               |   |                           |   |    |   |    |   |     |   |     |
| 22 | [ <b>using_hydroxyurea</b> ]                        | Section Header: <i>Management Details</i><br>Using Hydroxyurea | radio <table><tr><td>1</td><td>Yes</td></tr><tr><td>2</td><td>No</td></tr><tr><td>3</td><td>Truly unknown</td></tr><tr><td>4</td><td>Not asked / Not collected</td></tr></table><br>Custom alignment: RH                                                                   | 1 | Yes | 2 | No | 3 | Truly unknown | 4 | Not asked / Not collected |   |    |   |    |   |     |   |     |
| 1  | Yes                                                 |                                                                |                                                                                                                                                                                                                                                                            |   |     |   |    |   |               |   |                           |   |    |   |    |   |     |   |     |
| 2  | No                                                  |                                                                |                                                                                                                                                                                                                                                                            |   |     |   |    |   |               |   |                           |   |    |   |    |   |     |   |     |
| 3  | Truly unknown                                       |                                                                |                                                                                                                                                                                                                                                                            |   |     |   |    |   |               |   |                           |   |    |   |    |   |     |   |     |
| 4  | Not asked / Not collected                           |                                                                |                                                                                                                                                                                                                                                                            |   |     |   |    |   |               |   |                           |   |    |   |    |   |     |   |     |
| 23 | [ <b>using_hydroxyurea_ever</b> ]                   | Using Hydroxyurea (Ever)                                       | radio <table><tr><td>1</td><td>Yes</td></tr><tr><td>2</td><td>No</td></tr><tr><td>3</td><td>Truly unknown</td></tr><tr><td>4</td><td>Not asked / Not collected</td></tr></table><br>Custom alignment: RH                                                                   | 1 | Yes | 2 | No | 3 | Truly unknown | 4 | Not asked / Not collected |   |    |   |    |   |     |   |     |
| 1  | Yes                                                 |                                                                |                                                                                                                                                                                                                                                                            |   |     |   |    |   |               |   |                           |   |    |   |    |   |     |   |     |
| 2  | No                                                  |                                                                |                                                                                                                                                                                                                                                                            |   |     |   |    |   |               |   |                           |   |    |   |    |   |     |   |     |
| 3  | Truly unknown                                       |                                                                |                                                                                                                                                                                                                                                                            |   |     |   |    |   |               |   |                           |   |    |   |    |   |     |   |     |
| 4  | Not asked / Not collected                           |                                                                |                                                                                                                                                                                                                                                                            |   |     |   |    |   |               |   |                           |   |    |   |    |   |     |   |     |
| 24 | [ <b>date_of_initiation_of_hydr</b> ]               | Date of Initiation of Hydroxyurea Therapy                      | text (date_dmy)                                                                                                                                                                                                                                                            |   |     |   |    |   |               |   |                           |   |    |   |    |   |     |   |     |
| 25 | [ <b>penicillin_v_prophylaxis</b> ]                 | Penicillin V (prophylaxis)                                     | radio <table><tr><td>1</td><td>Yes</td></tr><tr><td>2</td><td>No</td></tr><tr><td>3</td><td>Truly unknown</td></tr><tr><td>4</td><td>Not asked / Not collected</td></tr></table><br>Custom alignment: RH                                                                   | 1 | Yes | 2 | No | 3 | Truly unknown | 4 | Not asked / Not collected |   |    |   |    |   |     |   |     |
| 1  | Yes                                                 |                                                                |                                                                                                                                                                                                                                                                            |   |     |   |    |   |               |   |                           |   |    |   |    |   |     |   |     |
| 2  | No                                                  |                                                                |                                                                                                                                                                                                                                                                            |   |     |   |    |   |               |   |                           |   |    |   |    |   |     |   |     |
| 3  | Truly unknown                                       |                                                                |                                                                                                                                                                                                                                                                            |   |     |   |    |   |               |   |                           |   |    |   |    |   |     |   |     |
| 4  | Not asked / Not collected                           |                                                                |                                                                                                                                                                                                                                                                            |   |     |   |    |   |               |   |                           |   |    |   |    |   |     |   |     |
| 26 | [ <b>penicillin_v_prophylaxis_e</b><br><b>ver</b> ] | Penicillin V (prophylaxis) (Ever)                              | radio <table><tr><td>1</td><td>Yes</td></tr><tr><td>2</td><td>No</td></tr><tr><td>3</td><td>Truly unknown</td></tr><tr><td>4</td><td>Not asked / Not collected</td></tr></table><br>Custom alignment: RH                                                                   | 1 | Yes | 2 | No | 3 | Truly unknown | 4 | Not asked / Not collected |   |    |   |    |   |     |   |     |
| 1  | Yes                                                 |                                                                |                                                                                                                                                                                                                                                                            |   |     |   |    |   |               |   |                           |   |    |   |    |   |     |   |     |
| 2  | No                                                  |                                                                |                                                                                                                                                                                                                                                                            |   |     |   |    |   |               |   |                           |   |    |   |    |   |     |   |     |
| 3  | Truly unknown                                       |                                                                |                                                                                                                                                                                                                                                                            |   |     |   |    |   |               |   |                           |   |    |   |    |   |     |   |     |
| 4  | Not asked / Not collected                           |                                                                |                                                                                                                                                                                                                                                                            |   |     |   |    |   |               |   |                           |   |    |   |    |   |     |   |     |
| 27 | [ <b>folic_acid</b> ]                               | Folic Acid                                                     | radio <table><tr><td>1</td><td>Yes</td></tr><tr><td>2</td><td>No</td></tr><tr><td>3</td><td>Truly unknown</td></tr><tr><td>4</td><td>Not asked / Not collected</td></tr></table><br>Custom alignment: RH                                                                   | 1 | Yes | 2 | No | 3 | Truly unknown | 4 | Not asked / Not collected |   |    |   |    |   |     |   |     |
| 1  | Yes                                                 |                                                                |                                                                                                                                                                                                                                                                            |   |     |   |    |   |               |   |                           |   |    |   |    |   |     |   |     |
| 2  | No                                                  |                                                                |                                                                                                                                                                                                                                                                            |   |     |   |    |   |               |   |                           |   |    |   |    |   |     |   |     |
| 3  | Truly unknown                                       |                                                                |                                                                                                                                                                                                                                                                            |   |     |   |    |   |               |   |                           |   |    |   |    |   |     |   |     |
| 4  | Not asked / Not collected                           |                                                                |                                                                                                                                                                                                                                                                            |   |     |   |    |   |               |   |                           |   |    |   |    |   |     |   |     |

|    |                                  |                                                       |                                                                                                                                                                                                                                                                                                                               |   |                 |                  |    |                 |                          |   |                           |                                  |   |                 |               |
|----|----------------------------------|-------------------------------------------------------|-------------------------------------------------------------------------------------------------------------------------------------------------------------------------------------------------------------------------------------------------------------------------------------------------------------------------------|---|-----------------|------------------|----|-----------------|--------------------------|---|---------------------------|----------------------------------|---|-----------------|---------------|
| 28 | [ folic_acid_ever ]              | Folic Acid (Ever)                                     | radio <table><tr><td>1</td><td>Yes</td></tr><tr><td>2</td><td>No</td></tr><tr><td>3</td><td>Truly unknown</td></tr><tr><td>4</td><td>Not asked / Not collected</td></tr></table> Custom alignment: RH                                                                                                                         | 1 | Yes             | 2                | No | 3               | Truly unknown            | 4 | Not asked / Not collected |                                  |   |                 |               |
| 1  | Yes                              |                                                       |                                                                                                                                                                                                                                                                                                                               |   |                 |                  |    |                 |                          |   |                           |                                  |   |                 |               |
| 2  | No                               |                                                       |                                                                                                                                                                                                                                                                                                                               |   |                 |                  |    |                 |                          |   |                           |                                  |   |                 |               |
| 3  | Truly unknown                    |                                                       |                                                                                                                                                                                                                                                                                                                               |   |                 |                  |    |                 |                          |   |                           |                                  |   |                 |               |
| 4  | Not asked / Not collected        |                                                       |                                                                                                                                                                                                                                                                                                                               |   |                 |                  |    |                 |                          |   |                           |                                  |   |                 |               |
| 29 | [ antimalaria_prophylaxis ]      | Anti Malaria Prophylaxis                              | radio <table><tr><td>1</td><td>Yes</td></tr><tr><td>2</td><td>No</td></tr><tr><td>3</td><td>Truly unknown</td></tr><tr><td>4</td><td>Not asked / Not collected</td></tr></table> Custom alignment: RH                                                                                                                         | 1 | Yes             | 2                | No | 3               | Truly unknown            | 4 | Not asked / Not collected |                                  |   |                 |               |
| 1  | Yes                              |                                                       |                                                                                                                                                                                                                                                                                                                               |   |                 |                  |    |                 |                          |   |                           |                                  |   |                 |               |
| 2  | No                               |                                                       |                                                                                                                                                                                                                                                                                                                               |   |                 |                  |    |                 |                          |   |                           |                                  |   |                 |               |
| 3  | Truly unknown                    |                                                       |                                                                                                                                                                                                                                                                                                                               |   |                 |                  |    |                 |                          |   |                           |                                  |   |                 |               |
| 4  | Not asked / Not collected        |                                                       |                                                                                                                                                                                                                                                                                                                               |   |                 |                  |    |                 |                          |   |                           |                                  |   |                 |               |
| 30 | [ antimalaria_prophylaxis_ever ] | Anti Malaria Prophylaxis (Ever)                       | radio <table><tr><td>1</td><td>Yes</td></tr><tr><td>2</td><td>No</td></tr><tr><td>3</td><td>Truly unknown</td></tr><tr><td>4</td><td>Not asked / Not collected</td></tr></table> Custom alignment: RH                                                                                                                         | 1 | Yes             | 2                | No | 3               | Truly unknown            | 4 | Not asked / Not collected |                                  |   |                 |               |
| 1  | Yes                              |                                                       |                                                                                                                                                                                                                                                                                                                               |   |                 |                  |    |                 |                          |   |                           |                                  |   |                 |               |
| 2  | No                               |                                                       |                                                                                                                                                                                                                                                                                                                               |   |                 |                  |    |                 |                          |   |                           |                                  |   |                 |               |
| 3  | Truly unknown                    |                                                       |                                                                                                                                                                                                                                                                                                                               |   |                 |                  |    |                 |                          |   |                           |                                  |   |                 |               |
| 4  | Not asked / Not collected        |                                                       |                                                                                                                                                                                                                                                                                                                               |   |                 |                  |    |                 |                          |   |                           |                                  |   |                 |               |
| 31 | [ pneumococcal_vacc_uptodate ]   | Pneumococcal Vaccination up to date                   | radio <table><tr><td>1</td><td>Yes</td></tr><tr><td>2</td><td>No</td></tr><tr><td>3</td><td>Truly unknown</td></tr><tr><td>4</td><td>Not asked / Not collected</td></tr></table> Custom alignment: RH                                                                                                                         | 1 | Yes             | 2                | No | 3               | Truly unknown            | 4 | Not asked / Not collected |                                  |   |                 |               |
| 1  | Yes                              |                                                       |                                                                                                                                                                                                                                                                                                                               |   |                 |                  |    |                 |                          |   |                           |                                  |   |                 |               |
| 2  | No                               |                                                       |                                                                                                                                                                                                                                                                                                                               |   |                 |                  |    |                 |                          |   |                           |                                  |   |                 |               |
| 3  | Truly unknown                    |                                                       |                                                                                                                                                                                                                                                                                                                               |   |                 |                  |    |                 |                          |   |                           |                                  |   |                 |               |
| 4  | Not asked / Not collected        |                                                       |                                                                                                                                                                                                                                                                                                                               |   |                 |                  |    |                 |                          |   |                           |                                  |   |                 |               |
| 32 | [ residence ]                    | Section Header: Contact Details<br>Residence          | text, Identifier                                                                                                                                                                                                                                                                                                              |   |                 |                  |    |                 |                          |   |                           |                                  |   |                 |               |
| 33 | [ street ]                       | Street                                                | text, Identifier                                                                                                                                                                                                                                                                                                              |   |                 |                  |    |                 |                          |   |                           |                                  |   |                 |               |
| 34 | [ lga_residence ]                | LGA of Residence                                      | text                                                                                                                                                                                                                                                                                                                          |   |                 |                  |    |                 |                          |   |                           |                                  |   |                 |               |
| 35 | [ state_of_residence ]           | State of Residence                                    | text                                                                                                                                                                                                                                                                                                                          |   |                 |                  |    |                 |                          |   |                           |                                  |   |                 |               |
| 36 | [ geo_zone ]                     | Geopolitical Zone                                     | text                                                                                                                                                                                                                                                                                                                          |   |                 |                  |    |                 |                          |   |                           |                                  |   |                 |               |
| 37 | [ telephone1 ]                   | Telephone1                                            | text, Identifier                                                                                                                                                                                                                                                                                                              |   |                 |                  |    |                 |                          |   |                           |                                  |   |                 |               |
| 38 | [ telephone2 ]                   | Telephone2                                            | text, Identifier                                                                                                                                                                                                                                                                                                              |   |                 |                  |    |                 |                          |   |                           |                                  |   |                 |               |
| 39 | [ next_of_kin_name ]             | Next-of-kin Name                                      | text, Identifier                                                                                                                                                                                                                                                                                                              |   |                 |                  |    |                 |                          |   |                           |                                  |   |                 |               |
| 40 | [ next_of_kin_relationship ]     | Relationship to the Patient                           | text                                                                                                                                                                                                                                                                                                                          |   |                 |                  |    |                 |                          |   |                           |                                  |   |                 |               |
| 41 | [ next_of_kin_telephone_number ] | Next of Kin Telephone Number                          | text, Identifier                                                                                                                                                                                                                                                                                                              |   |                 |                  |    |                 |                          |   |                           |                                  |   |                 |               |
| 42 | [ consent_obtained ]             | Section Header: Consent<br>Has the patient consented? | radio <table><tr><td>1</td><td>Yes</td></tr><tr><td>2</td><td>No</td></tr><tr><td>7</td><td>Refused</td></tr><tr><td>9</td><td>Don't Know</td></tr></table>                                                                                                                                                                   | 1 | Yes             | 2                | No | 7               | Refused                  | 9 | Don't Know                |                                  |   |                 |               |
| 1  | Yes                              |                                                       |                                                                                                                                                                                                                                                                                                                               |   |                 |                  |    |                 |                          |   |                           |                                  |   |                 |               |
| 2  | No                               |                                                       |                                                                                                                                                                                                                                                                                                                               |   |                 |                  |    |                 |                          |   |                           |                                  |   |                 |               |
| 7  | Refused                          |                                                       |                                                                                                                                                                                                                                                                                                                               |   |                 |                  |    |                 |                          |   |                           |                                  |   |                 |               |
| 9  | Don't Know                       |                                                       |                                                                                                                                                                                                                                                                                                                               |   |                 |                  |    |                 |                          |   |                           |                                  |   |                 |               |
| 43 | [ consent_type ]                 | Type of informed consent                              | checkbox <table><tr><td>1</td><td>consent_type__1</td><td>Study enrollment</td></tr><tr><td>2</td><td>consent_type__2</td><td>Specimen Storage Consent</td></tr><tr><td>3</td><td>consent_type__3</td><td>Genetic Material Storage Consent</td></tr><tr><td>4</td><td>consent_type__4</td><td>Broad consent</td></tr></table> | 1 | consent_type__1 | Study enrollment | 2  | consent_type__2 | Specimen Storage Consent | 3 | consent_type__3           | Genetic Material Storage Consent | 4 | consent_type__4 | Broad consent |
| 1  | consent_type__1                  | Study enrollment                                      |                                                                                                                                                                                                                                                                                                                               |   |                 |                  |    |                 |                          |   |                           |                                  |   |                 |               |
| 2  | consent_type__2                  | Specimen Storage Consent                              |                                                                                                                                                                                                                                                                                                                               |   |                 |                  |    |                 |                          |   |                           |                                  |   |                 |               |
| 3  | consent_type__3                  | Genetic Material Storage Consent                      |                                                                                                                                                                                                                                                                                                                               |   |                 |                  |    |                 |                          |   |                           |                                  |   |                 |               |
| 4  | consent_type__4                  | Broad consent                                         |                                                                                                                                                                                                                                                                                                                               |   |                 |                  |    |                 |                          |   |                           |                                  |   |                 |               |

|    |                                                                                            |                                           |                                                                                                                                                                                  |   |     |   |    |   |                           |   |                           |
|----|--------------------------------------------------------------------------------------------|-------------------------------------------|----------------------------------------------------------------------------------------------------------------------------------------------------------------------------------|---|-----|---|----|---|---------------------------|---|---------------------------|
| 44 | [ consent_date ]                                                                           | Date subject signed consent               | text (date_dmy)                                                                                                                                                                  |   |     |   |    |   |                           |   |                           |
| 45 | [ consent_file ]                                                                           | Upload the consent form                   | file                                                                                                                                                                             |   |     |   |    |   |                           |   |                           |
| 46 | [ added_by ]                                                                               | Added by                                  | text<br>Field Annotation: @USERNAME @READONLY-FORM @HIDDEN                                                                                                                       |   |     |   |    |   |                           |   |                           |
| 47 | [ add_date ]                                                                               | Add Date                                  | text (date_dmy)<br>Field Annotation: @TODAY @READONLY-FORM @HIDDEN                                                                                                               |   |     |   |    |   |                           |   |                           |
| 48 | [ last_edited_by ]                                                                         | Last edited by                            | text<br>Field Annotation: @USERNAME @HIDDEN                                                                                                                                      |   |     |   |    |   |                           |   |                           |
| 49 | [ last_edit_date ]                                                                         | Last edit Date                            | text (date_dmy)<br>Field Annotation: @TODAY @READONLY-FORM @HIDDEN                                                                                                               |   |     |   |    |   |                           |   |                           |
| 50 | [ blood_transfusion ]                                                                      | Blood Transfusion                         | radio <table><tr><td>1</td><td>Yes</td></tr><tr><td>2</td><td>No</td></tr><tr><td>3</td><td>Truly unknown</td></tr><tr><td>4</td><td>Not asked / Not collected</td></tr></table> | 1 | Yes | 2 | No | 3 | Truly unknown             | 4 | Not asked / Not collected |
| 1  | Yes                                                                                        |                                           |                                                                                                                                                                                  |   |     |   |    |   |                           |   |                           |
| 2  | No                                                                                         |                                           |                                                                                                                                                                                  |   |     |   |    |   |                           |   |                           |
| 3  | Truly unknown                                                                              |                                           |                                                                                                                                                                                  |   |     |   |    |   |                           |   |                           |
| 4  | Not asked / Not collected                                                                  |                                           |                                                                                                                                                                                  |   |     |   |    |   |                           |   |                           |
| 51 | [ number_episodes ]                                                                        | Number of Episodes                        | text                                                                                                                                                                             |   |     |   |    |   |                           |   |                           |
| 52 | [ number_of_units_transfused ]<br><br>Show the field ONLY if:<br>[blood_transfusion] = '1' | Number of Units Transfused                | text                                                                                                                                                                             |   |     |   |    |   |                           |   |                           |
| 53 | [ freq_transfusion ]                                                                       | Frequency of Transfusion in the last year | text                                                                                                                                                                             |   |     |   |    |   |                           |   |                           |
| 54 | [ date_of_last_transfusion ]<br><br>Show the field ONLY if:<br>[blood_transfusion] = '1'   | Date of Last Transfusion (dd/mm/yyyy)     | text (date_dmy)                                                                                                                                                                  |   |     |   |    |   |                           |   |                           |
| 55 | [ frequency_of_pain_crisis_per_year ]                                                      | Frequency of Pain Crisis per Year         | text (number)                                                                                                                                                                    |   |     |   |    |   |                           |   |                           |
| 56 | [ other_pain_site ]                                                                        | Other Pain Site                           | text                                                                                                                                                                             |   |     |   |    |   |                           |   |                           |
| 57 | [ swelling ]                                                                               | Swelling                                  | radio <table><tr><td>1</td><td>Yes</td></tr><tr><td>2</td><td>No</td></tr><tr><td>4</td><td>Not asked / Not collected</td></tr></table>                                          | 1 | Yes | 2 | No | 4 | Not asked / Not collected |   |                           |
| 1  | Yes                                                                                        |                                           |                                                                                                                                                                                  |   |     |   |    |   |                           |   |                           |
| 2  | No                                                                                         |                                           |                                                                                                                                                                                  |   |     |   |    |   |                           |   |                           |
| 4  | Not asked / Not collected                                                                  |                                           |                                                                                                                                                                                  |   |     |   |    |   |                           |   |                           |
| 58 | [ learning_difficulty ]                                                                    | Learning Difficulty                       | radio <table><tr><td>1</td><td>Yes</td></tr><tr><td>2</td><td>No</td></tr><tr><td>4</td><td>Not asked / Not collected</td></tr></table>                                          | 1 | Yes | 2 | No | 4 | Not asked / Not collected |   |                           |
| 1  | Yes                                                                                        |                                           |                                                                                                                                                                                  |   |     |   |    |   |                           |   |                           |
| 2  | No                                                                                         |                                           |                                                                                                                                                                                  |   |     |   |    |   |                           |   |                           |
| 4  | Not asked / Not collected                                                                  |                                           |                                                                                                                                                                                  |   |     |   |    |   |                           |   |                           |
| 59 | [ hospitalized_30_days ]                                                                   | Hospitalized 30 days prior to visit       | radio <table><tr><td>1</td><td>Yes</td></tr><tr><td>2</td><td>No</td></tr><tr><td>4</td><td>Not asked / Not collected</td></tr></table>                                          | 1 | Yes | 2 | No | 4 | Not asked / Not collected |   |                           |
| 1  | Yes                                                                                        |                                           |                                                                                                                                                                                  |   |     |   |    |   |                           |   |                           |
| 2  | No                                                                                         |                                           |                                                                                                                                                                                  |   |     |   |    |   |                           |   |                           |
| 4  | Not asked / Not collected                                                                  |                                           |                                                                                                                                                                                  |   |     |   |    |   |                           |   |                           |
| 60 | [ abnormal_gait ]                                                                          | Abnormal GAIT                             | radio <table><tr><td>1</td><td>Yes</td></tr><tr><td>2</td><td>No</td></tr><tr><td>4</td><td>Not asked / Not collected</td></tr></table>                                          | 1 | Yes | 2 | No | 4 | Not asked / Not collected |   |                           |
| 1  | Yes                                                                                        |                                           |                                                                                                                                                                                  |   |     |   |    |   |                           |   |                           |
| 2  | No                                                                                         |                                           |                                                                                                                                                                                  |   |     |   |    |   |                           |   |                           |
| 4  | Not asked / Not collected                                                                  |                                           |                                                                                                                                                                                  |   |     |   |    |   |                           |   |                           |
| 61 | [ difficulty_in_walking ]                                                                  | Difficulty in walking                     | radio <table><tr><td>1</td><td>Yes</td></tr><tr><td>2</td><td>No</td></tr><tr><td>4</td><td>Not asked / Not collected</td></tr></table>                                          | 1 | Yes | 2 | No | 4 | Not asked / Not collected |   |                           |
| 1  | Yes                                                                                        |                                           |                                                                                                                                                                                  |   |     |   |    |   |                           |   |                           |
| 2  | No                                                                                         |                                           |                                                                                                                                                                                  |   |     |   |    |   |                           |   |                           |
| 4  | Not asked / Not collected                                                                  |                                           |                                                                                                                                                                                  |   |     |   |    |   |                           |   |                           |

|   |                           |                    |                  |                                                                                                                                                                                  |   |     |   |    |   |               |   |                           |
|---|---------------------------|--------------------|------------------|----------------------------------------------------------------------------------------------------------------------------------------------------------------------------------|---|-----|---|----|---|---------------|---|---------------------------|
|   | 62                        | [ anaemia ]        | Anaemia          | radio <table><tr><td>1</td><td>Yes</td></tr><tr><td>2</td><td>No</td></tr><tr><td>3</td><td>Truly unknown</td></tr><tr><td>4</td><td>Not asked / Not collected</td></tr></table> | 1 | Yes | 2 | No | 3 | Truly unknown | 4 | Not asked / Not collected |
| 1 | Yes                       |                    |                  |                                                                                                                                                                                  |   |     |   |    |   |               |   |                           |
| 2 | No                        |                    |                  |                                                                                                                                                                                  |   |     |   |    |   |               |   |                           |
| 3 | Truly unknown             |                    |                  |                                                                                                                                                                                  |   |     |   |    |   |               |   |                           |
| 4 | Not asked / Not collected |                    |                  |                                                                                                                                                                                  |   |     |   |    |   |               |   |                           |
|   | 63                        | [ fever ]          | Fever            | radio <table><tr><td>1</td><td>Yes</td></tr><tr><td>2</td><td>No</td></tr><tr><td>3</td><td>Truly unknown</td></tr><tr><td>4</td><td>Not asked / Not collected</td></tr></table> | 1 | Yes | 2 | No | 3 | Truly unknown | 4 | Not asked / Not collected |
| 1 | Yes                       |                    |                  |                                                                                                                                                                                  |   |     |   |    |   |               |   |                           |
| 2 | No                        |                    |                  |                                                                                                                                                                                  |   |     |   |    |   |               |   |                           |
| 3 | Truly unknown             |                    |                  |                                                                                                                                                                                  |   |     |   |    |   |               |   |                           |
| 4 | Not asked / Not collected |                    |                  |                                                                                                                                                                                  |   |     |   |    |   |               |   |                           |
|   | 64                        | [ malaria ]        | Malaria          | radio <table><tr><td>1</td><td>Yes</td></tr><tr><td>2</td><td>No</td></tr><tr><td>3</td><td>Truly unknown</td></tr><tr><td>4</td><td>Not asked / Not collected</td></tr></table> | 1 | Yes | 2 | No | 3 | Truly unknown | 4 | Not asked / Not collected |
| 1 | Yes                       |                    |                  |                                                                                                                                                                                  |   |     |   |    |   |               |   |                           |
| 2 | No                        |                    |                  |                                                                                                                                                                                  |   |     |   |    |   |               |   |                           |
| 3 | Truly unknown             |                    |                  |                                                                                                                                                                                  |   |     |   |    |   |               |   |                           |
| 4 | Not asked / Not collected |                    |                  |                                                                                                                                                                                  |   |     |   |    |   |               |   |                           |
|   | 65                        | [ headache ]       | Headache         | radio <table><tr><td>1</td><td>Yes</td></tr><tr><td>2</td><td>No</td></tr><tr><td>3</td><td>Truly unknown</td></tr><tr><td>4</td><td>Not asked / Not collected</td></tr></table> | 1 | Yes | 2 | No | 3 | Truly unknown | 4 | Not asked / Not collected |
| 1 | Yes                       |                    |                  |                                                                                                                                                                                  |   |     |   |    |   |               |   |                           |
| 2 | No                        |                    |                  |                                                                                                                                                                                  |   |     |   |    |   |               |   |                           |
| 3 | Truly unknown             |                    |                  |                                                                                                                                                                                  |   |     |   |    |   |               |   |                           |
| 4 | Not asked / Not collected |                    |                  |                                                                                                                                                                                  |   |     |   |    |   |               |   |                           |
|   | 66                        | [ dizziness ]      | Dizziness        | radio <table><tr><td>1</td><td>Yes</td></tr><tr><td>2</td><td>No</td></tr><tr><td>3</td><td>Truly unknown</td></tr><tr><td>4</td><td>Not asked / Not collected</td></tr></table> | 1 | Yes | 2 | No | 3 | Truly unknown | 4 | Not asked / Not collected |
| 1 | Yes                       |                    |                  |                                                                                                                                                                                  |   |     |   |    |   |               |   |                           |
| 2 | No                        |                    |                  |                                                                                                                                                                                  |   |     |   |    |   |               |   |                           |
| 3 | Truly unknown             |                    |                  |                                                                                                                                                                                  |   |     |   |    |   |               |   |                           |
| 4 | Not asked / Not collected |                    |                  |                                                                                                                                                                                  |   |     |   |    |   |               |   |                           |
|   | 67                        | [ dizziness_ever ] | Dizziness (Ever) | radio <table><tr><td>1</td><td>Yes</td></tr><tr><td>2</td><td>No</td></tr><tr><td>3</td><td>Truly unknown</td></tr><tr><td>4</td><td>Not asked / Not collected</td></tr></table> | 1 | Yes | 2 | No | 3 | Truly unknown | 4 | Not asked / Not collected |
| 1 | Yes                       |                    |                  |                                                                                                                                                                                  |   |     |   |    |   |               |   |                           |
| 2 | No                        |                    |                  |                                                                                                                                                                                  |   |     |   |    |   |               |   |                           |
| 3 | Truly unknown             |                    |                  |                                                                                                                                                                                  |   |     |   |    |   |               |   |                           |
| 4 | Not asked / Not collected |                    |                  |                                                                                                                                                                                  |   |     |   |    |   |               |   |                           |
|   | 68                        | [ seizures ]       | Seizures         | radio <table><tr><td>1</td><td>Yes</td></tr><tr><td>2</td><td>No</td></tr><tr><td>3</td><td>Truly unknown</td></tr><tr><td>4</td><td>Not asked / Not collected</td></tr></table> | 1 | Yes | 2 | No | 3 | Truly unknown | 4 | Not asked / Not collected |
| 1 | Yes                       |                    |                  |                                                                                                                                                                                  |   |     |   |    |   |               |   |                           |
| 2 | No                        |                    |                  |                                                                                                                                                                                  |   |     |   |    |   |               |   |                           |
| 3 | Truly unknown             |                    |                  |                                                                                                                                                                                  |   |     |   |    |   |               |   |                           |
| 4 | Not asked / Not collected |                    |                  |                                                                                                                                                                                  |   |     |   |    |   |               |   |                           |
|   | 69                        | [ seizures_ever ]  | Seizures (Ever)  | radio <table><tr><td>1</td><td>Yes</td></tr><tr><td>2</td><td>No</td></tr><tr><td>3</td><td>Truly unknown</td></tr><tr><td>4</td><td>Not asked / Not collected</td></tr></table> | 1 | Yes | 2 | No | 3 | Truly unknown | 4 | Not asked / Not collected |
| 1 | Yes                       |                    |                  |                                                                                                                                                                                  |   |     |   |    |   |               |   |                           |
| 2 | No                        |                    |                  |                                                                                                                                                                                  |   |     |   |    |   |               |   |                           |
| 3 | Truly unknown             |                    |                  |                                                                                                                                                                                  |   |     |   |    |   |               |   |                           |
| 4 | Not asked / Not collected |                    |                  |                                                                                                                                                                                  |   |     |   |    |   |               |   |                           |
|   | 70                        | [ dactylitis ]     | Dactylitis       | radio <table><tr><td>1</td><td>Yes</td></tr><tr><td>2</td><td>No</td></tr><tr><td>3</td><td>Truly unknown</td></tr><tr><td>4</td><td>Not asked / Not collected</td></tr></table> | 1 | Yes | 2 | No | 3 | Truly unknown | 4 | Not asked / Not collected |
| 1 | Yes                       |                    |                  |                                                                                                                                                                                  |   |     |   |    |   |               |   |                           |
| 2 | No                        |                    |                  |                                                                                                                                                                                  |   |     |   |    |   |               |   |                           |
| 3 | Truly unknown             |                    |                  |                                                                                                                                                                                  |   |     |   |    |   |               |   |                           |
| 4 | Not asked / Not collected |                    |                  |                                                                                                                                                                                  |   |     |   |    |   |               |   |                           |

|       |                           |                               |                             |                                                                                                                                                                                                               |       |  |   |     |   |    |   |               |   |                           |
|-------|---------------------------|-------------------------------|-----------------------------|---------------------------------------------------------------------------------------------------------------------------------------------------------------------------------------------------------------|-------|--|---|-----|---|----|---|---------------|---|---------------------------|
|       | 71                        | [ dactylitis_ever ]           | Dactylitis (Ever)           | <table><tr><td colspan="2">radio</td></tr><tr><td>1</td><td>Yes</td></tr><tr><td>2</td><td>No</td></tr><tr><td>3</td><td>Truly unknown</td></tr><tr><td>4</td><td>Not asked / Not collected</td></tr></table> | radio |  | 1 | Yes | 2 | No | 3 | Truly unknown | 4 | Not asked / Not collected |
| radio |                           |                               |                             |                                                                                                                                                                                                               |       |  |   |     |   |    |   |               |   |                           |
| 1     | Yes                       |                               |                             |                                                                                                                                                                                                               |       |  |   |     |   |    |   |               |   |                           |
| 2     | No                        |                               |                             |                                                                                                                                                                                                               |       |  |   |     |   |    |   |               |   |                           |
| 3     | Truly unknown             |                               |                             |                                                                                                                                                                                                               |       |  |   |     |   |    |   |               |   |                           |
| 4     | Not asked / Not collected |                               |                             |                                                                                                                                                                                                               |       |  |   |     |   |    |   |               |   |                           |
|       | 72                        | [ bone_pain ]                 | Bone Pain                   | <table><tr><td colspan="2">radio</td></tr><tr><td>1</td><td>Yes</td></tr><tr><td>2</td><td>No</td></tr><tr><td>3</td><td>Truly unknown</td></tr><tr><td>4</td><td>Not asked / Not collected</td></tr></table> | radio |  | 1 | Yes | 2 | No | 3 | Truly unknown | 4 | Not asked / Not collected |
| radio |                           |                               |                             |                                                                                                                                                                                                               |       |  |   |     |   |    |   |               |   |                           |
| 1     | Yes                       |                               |                             |                                                                                                                                                                                                               |       |  |   |     |   |    |   |               |   |                           |
| 2     | No                        |                               |                             |                                                                                                                                                                                                               |       |  |   |     |   |    |   |               |   |                           |
| 3     | Truly unknown             |                               |                             |                                                                                                                                                                                                               |       |  |   |     |   |    |   |               |   |                           |
| 4     | Not asked / Not collected |                               |                             |                                                                                                                                                                                                               |       |  |   |     |   |    |   |               |   |                           |
|       | 73                        | [ bone_pain_ever ]            | Bone Pain (Ever)            | <table><tr><td colspan="2">radio</td></tr><tr><td>1</td><td>Yes</td></tr><tr><td>2</td><td>No</td></tr><tr><td>3</td><td>Truly unknown</td></tr><tr><td>4</td><td>Not asked / Not collected</td></tr></table> | radio |  | 1 | Yes | 2 | No | 3 | Truly unknown | 4 | Not asked / Not collected |
| radio |                           |                               |                             |                                                                                                                                                                                                               |       |  |   |     |   |    |   |               |   |                           |
| 1     | Yes                       |                               |                             |                                                                                                                                                                                                               |       |  |   |     |   |    |   |               |   |                           |
| 2     | No                        |                               |                             |                                                                                                                                                                                                               |       |  |   |     |   |    |   |               |   |                           |
| 3     | Truly unknown             |                               |                             |                                                                                                                                                                                                               |       |  |   |     |   |    |   |               |   |                           |
| 4     | Not asked / Not collected |                               |                             |                                                                                                                                                                                                               |       |  |   |     |   |    |   |               |   |                           |
|       | 74                        | [ hip_pain ]                  | Hip Pain                    | <table><tr><td colspan="2">radio</td></tr><tr><td>1</td><td>Yes</td></tr><tr><td>2</td><td>No</td></tr><tr><td>3</td><td>Truly unknown</td></tr><tr><td>4</td><td>Not asked / Not collected</td></tr></table> | radio |  | 1 | Yes | 2 | No | 3 | Truly unknown | 4 | Not asked / Not collected |
| radio |                           |                               |                             |                                                                                                                                                                                                               |       |  |   |     |   |    |   |               |   |                           |
| 1     | Yes                       |                               |                             |                                                                                                                                                                                                               |       |  |   |     |   |    |   |               |   |                           |
| 2     | No                        |                               |                             |                                                                                                                                                                                                               |       |  |   |     |   |    |   |               |   |                           |
| 3     | Truly unknown             |                               |                             |                                                                                                                                                                                                               |       |  |   |     |   |    |   |               |   |                           |
| 4     | Not asked / Not collected |                               |                             |                                                                                                                                                                                                               |       |  |   |     |   |    |   |               |   |                           |
|       | 75                        | [ hip_pain_ever ]             | Hip Pain (Ever)             | <table><tr><td colspan="2">radio</td></tr><tr><td>1</td><td>Yes</td></tr><tr><td>2</td><td>No</td></tr><tr><td>3</td><td>Truly unknown</td></tr><tr><td>4</td><td>Not asked / Not collected</td></tr></table> | radio |  | 1 | Yes | 2 | No | 3 | Truly unknown | 4 | Not asked / Not collected |
| radio |                           |                               |                             |                                                                                                                                                                                                               |       |  |   |     |   |    |   |               |   |                           |
| 1     | Yes                       |                               |                             |                                                                                                                                                                                                               |       |  |   |     |   |    |   |               |   |                           |
| 2     | No                        |                               |                             |                                                                                                                                                                                                               |       |  |   |     |   |    |   |               |   |                           |
| 3     | Truly unknown             |                               |                             |                                                                                                                                                                                                               |       |  |   |     |   |    |   |               |   |                           |
| 4     | Not asked / Not collected |                               |                             |                                                                                                                                                                                                               |       |  |   |     |   |    |   |               |   |                           |
|       | 76                        | [ chest_pain ]                | Chest Pain                  | <table><tr><td colspan="2">radio</td></tr><tr><td>1</td><td>Yes</td></tr><tr><td>2</td><td>No</td></tr><tr><td>3</td><td>Truly unknown</td></tr><tr><td>4</td><td>Not asked / Not collected</td></tr></table> | radio |  | 1 | Yes | 2 | No | 3 | Truly unknown | 4 | Not asked / Not collected |
| radio |                           |                               |                             |                                                                                                                                                                                                               |       |  |   |     |   |    |   |               |   |                           |
| 1     | Yes                       |                               |                             |                                                                                                                                                                                                               |       |  |   |     |   |    |   |               |   |                           |
| 2     | No                        |                               |                             |                                                                                                                                                                                                               |       |  |   |     |   |    |   |               |   |                           |
| 3     | Truly unknown             |                               |                             |                                                                                                                                                                                                               |       |  |   |     |   |    |   |               |   |                           |
| 4     | Not asked / Not collected |                               |                             |                                                                                                                                                                                                               |       |  |   |     |   |    |   |               |   |                           |
|       | 77                        | [ chest_pain_ever ]           | Chest Pain (Ever)           | <table><tr><td colspan="2">radio</td></tr><tr><td>1</td><td>Yes</td></tr><tr><td>2</td><td>No</td></tr><tr><td>3</td><td>Truly unknown</td></tr><tr><td>4</td><td>Not asked / Not collected</td></tr></table> | radio |  | 1 | Yes | 2 | No | 3 | Truly unknown | 4 | Not asked / Not collected |
| radio |                           |                               |                             |                                                                                                                                                                                                               |       |  |   |     |   |    |   |               |   |                           |
| 1     | Yes                       |                               |                             |                                                                                                                                                                                                               |       |  |   |     |   |    |   |               |   |                           |
| 2     | No                        |                               |                             |                                                                                                                                                                                                               |       |  |   |     |   |    |   |               |   |                           |
| 3     | Truly unknown             |                               |                             |                                                                                                                                                                                                               |       |  |   |     |   |    |   |               |   |                           |
| 4     | Not asked / Not collected |                               |                             |                                                                                                                                                                                                               |       |  |   |     |   |    |   |               |   |                           |
|       | 78                        | [ acute_chest_syndrome ]      | Acute Chest Syndrome        | <table><tr><td colspan="2">radio</td></tr><tr><td>1</td><td>Yes</td></tr><tr><td>2</td><td>No</td></tr><tr><td>3</td><td>Truly unknown</td></tr><tr><td>4</td><td>Not asked / Not collected</td></tr></table> | radio |  | 1 | Yes | 2 | No | 3 | Truly unknown | 4 | Not asked / Not collected |
| radio |                           |                               |                             |                                                                                                                                                                                                               |       |  |   |     |   |    |   |               |   |                           |
| 1     | Yes                       |                               |                             |                                                                                                                                                                                                               |       |  |   |     |   |    |   |               |   |                           |
| 2     | No                        |                               |                             |                                                                                                                                                                                                               |       |  |   |     |   |    |   |               |   |                           |
| 3     | Truly unknown             |                               |                             |                                                                                                                                                                                                               |       |  |   |     |   |    |   |               |   |                           |
| 4     | Not asked / Not collected |                               |                             |                                                                                                                                                                                                               |       |  |   |     |   |    |   |               |   |                           |
|       | 79                        | [ acute_chest_syndrome_ever ] | Acute Chest Syndrome (Ever) | <table><tr><td colspan="2">radio</td></tr><tr><td>1</td><td>Yes</td></tr><tr><td>2</td><td>No</td></tr><tr><td>3</td><td>Truly unknown</td></tr><tr><td>4</td><td>Not asked / Not collected</td></tr></table> | radio |  | 1 | Yes | 2 | No | 3 | Truly unknown | 4 | Not asked / Not collected |
| radio |                           |                               |                             |                                                                                                                                                                                                               |       |  |   |     |   |    |   |               |   |                           |
| 1     | Yes                       |                               |                             |                                                                                                                                                                                                               |       |  |   |     |   |    |   |               |   |                           |
| 2     | No                        |                               |                             |                                                                                                                                                                                                               |       |  |   |     |   |    |   |               |   |                           |
| 3     | Truly unknown             |                               |                             |                                                                                                                                                                                                               |       |  |   |     |   |    |   |               |   |                           |
| 4     | Not asked / Not collected |                               |                             |                                                                                                                                                                                                               |       |  |   |     |   |    |   |               |   |                           |

|   |                           |                                  |                                           |                                                                                                                                                                                  |   |     |   |    |   |               |   |                           |
|---|---------------------------|----------------------------------|-------------------------------------------|----------------------------------------------------------------------------------------------------------------------------------------------------------------------------------|---|-----|---|----|---|---------------|---|---------------------------|
|   | 80                        | [ leg_ulcer ]                    | Leg Ulcer                                 | radio <table><tr><td>1</td><td>Yes</td></tr><tr><td>2</td><td>No</td></tr><tr><td>3</td><td>Truly unknown</td></tr><tr><td>4</td><td>Not asked / Not collected</td></tr></table> | 1 | Yes | 2 | No | 3 | Truly unknown | 4 | Not asked / Not collected |
| 1 | Yes                       |                                  |                                           |                                                                                                                                                                                  |   |     |   |    |   |               |   |                           |
| 2 | No                        |                                  |                                           |                                                                                                                                                                                  |   |     |   |    |   |               |   |                           |
| 3 | Truly unknown             |                                  |                                           |                                                                                                                                                                                  |   |     |   |    |   |               |   |                           |
| 4 | Not asked / Not collected |                                  |                                           |                                                                                                                                                                                  |   |     |   |    |   |               |   |                           |
|   | 81                        | [ leg_ulcer_ever ]               | Leg Ulcer (Ever)                          | radio <table><tr><td>1</td><td>Yes</td></tr><tr><td>2</td><td>No</td></tr><tr><td>3</td><td>Truly unknown</td></tr><tr><td>4</td><td>Not asked / Not collected</td></tr></table> | 1 | Yes | 2 | No | 3 | Truly unknown | 4 | Not asked / Not collected |
| 1 | Yes                       |                                  |                                           |                                                                                                                                                                                  |   |     |   |    |   |               |   |                           |
| 2 | No                        |                                  |                                           |                                                                                                                                                                                  |   |     |   |    |   |               |   |                           |
| 3 | Truly unknown             |                                  |                                           |                                                                                                                                                                                  |   |     |   |    |   |               |   |                           |
| 4 | Not asked / Not collected |                                  |                                           |                                                                                                                                                                                  |   |     |   |    |   |               |   |                           |
|   | 82                        | [ osteonecrosis ]                | Osteonecrosis (Avascular Necrosis)        | radio <table><tr><td>1</td><td>Yes</td></tr><tr><td>2</td><td>No</td></tr><tr><td>3</td><td>Truly unknown</td></tr><tr><td>4</td><td>Not asked / Not collected</td></tr></table> | 1 | Yes | 2 | No | 3 | Truly unknown | 4 | Not asked / Not collected |
| 1 | Yes                       |                                  |                                           |                                                                                                                                                                                  |   |     |   |    |   |               |   |                           |
| 2 | No                        |                                  |                                           |                                                                                                                                                                                  |   |     |   |    |   |               |   |                           |
| 3 | Truly unknown             |                                  |                                           |                                                                                                                                                                                  |   |     |   |    |   |               |   |                           |
| 4 | Not asked / Not collected |                                  |                                           |                                                                                                                                                                                  |   |     |   |    |   |               |   |                           |
|   | 83                        | [ osteonecrosis_ever ]           | Osteonecrosis (Avascular Necrosis) (Ever) | radio <table><tr><td>1</td><td>Yes</td></tr><tr><td>2</td><td>No</td></tr><tr><td>3</td><td>Truly unknown</td></tr><tr><td>4</td><td>Not asked / Not collected</td></tr></table> | 1 | Yes | 2 | No | 3 | Truly unknown | 4 | Not asked / Not collected |
| 1 | Yes                       |                                  |                                           |                                                                                                                                                                                  |   |     |   |    |   |               |   |                           |
| 2 | No                        |                                  |                                           |                                                                                                                                                                                  |   |     |   |    |   |               |   |                           |
| 3 | Truly unknown             |                                  |                                           |                                                                                                                                                                                  |   |     |   |    |   |               |   |                           |
| 4 | Not asked / Not collected |                                  |                                           |                                                                                                                                                                                  |   |     |   |    |   |               |   |                           |
|   | 84                        | [ difficulty_in_breathing ]      | Difficulty in breathing                   | radio <table><tr><td>1</td><td>Yes</td></tr><tr><td>2</td><td>No</td></tr><tr><td>3</td><td>Truly unknown</td></tr><tr><td>4</td><td>Not asked / Not collected</td></tr></table> | 1 | Yes | 2 | No | 3 | Truly unknown | 4 | Not asked / Not collected |
| 1 | Yes                       |                                  |                                           |                                                                                                                                                                                  |   |     |   |    |   |               |   |                           |
| 2 | No                        |                                  |                                           |                                                                                                                                                                                  |   |     |   |    |   |               |   |                           |
| 3 | Truly unknown             |                                  |                                           |                                                                                                                                                                                  |   |     |   |    |   |               |   |                           |
| 4 | Not asked / Not collected |                                  |                                           |                                                                                                                                                                                  |   |     |   |    |   |               |   |                           |
|   | 85                        | [ difficulty_in_breathing_ever ] | Difficulty in breathing (Ever)            | radio <table><tr><td>1</td><td>Yes</td></tr><tr><td>2</td><td>No</td></tr><tr><td>3</td><td>Truly unknown</td></tr><tr><td>4</td><td>Not asked / Not collected</td></tr></table> | 1 | Yes | 2 | No | 3 | Truly unknown | 4 | Not asked / Not collected |
| 1 | Yes                       |                                  |                                           |                                                                                                                                                                                  |   |     |   |    |   |               |   |                           |
| 2 | No                        |                                  |                                           |                                                                                                                                                                                  |   |     |   |    |   |               |   |                           |
| 3 | Truly unknown             |                                  |                                           |                                                                                                                                                                                  |   |     |   |    |   |               |   |                           |
| 4 | Not asked / Not collected |                                  |                                           |                                                                                                                                                                                  |   |     |   |    |   |               |   |                           |
|   | 86                        | [ exertional_dyspnaea ]          | Exertional Dyspnaea                       | radio <table><tr><td>1</td><td>Yes</td></tr><tr><td>2</td><td>No</td></tr><tr><td>3</td><td>Truly unknown</td></tr><tr><td>4</td><td>Not asked / Not collected</td></tr></table> | 1 | Yes | 2 | No | 3 | Truly unknown | 4 | Not asked / Not collected |
| 1 | Yes                       |                                  |                                           |                                                                                                                                                                                  |   |     |   |    |   |               |   |                           |
| 2 | No                        |                                  |                                           |                                                                                                                                                                                  |   |     |   |    |   |               |   |                           |
| 3 | Truly unknown             |                                  |                                           |                                                                                                                                                                                  |   |     |   |    |   |               |   |                           |
| 4 | Not asked / Not collected |                                  |                                           |                                                                                                                                                                                  |   |     |   |    |   |               |   |                           |
|   | 87                        | [ exertional_dyspnaea_ever ]     | Exertional Dyspnaea (Ever)                | radio <table><tr><td>1</td><td>Yes</td></tr><tr><td>2</td><td>No</td></tr><tr><td>3</td><td>Truly unknown</td></tr><tr><td>4</td><td>Not asked / Not collected</td></tr></table> | 1 | Yes | 2 | No | 3 | Truly unknown | 4 | Not asked / Not collected |
| 1 | Yes                       |                                  |                                           |                                                                                                                                                                                  |   |     |   |    |   |               |   |                           |
| 2 | No                        |                                  |                                           |                                                                                                                                                                                  |   |     |   |    |   |               |   |                           |
| 3 | Truly unknown             |                                  |                                           |                                                                                                                                                                                  |   |     |   |    |   |               |   |                           |
| 4 | Not asked / Not collected |                                  |                                           |                                                                                                                                                                                  |   |     |   |    |   |               |   |                           |
|   | 88                        | [ pulmonary_hypertension ]       | Pulmonary Hypertension                    | radio <table><tr><td>1</td><td>Yes</td></tr><tr><td>2</td><td>No</td></tr><tr><td>3</td><td>Truly unknown</td></tr><tr><td>4</td><td>Not asked / Not collected</td></tr></table> | 1 | Yes | 2 | No | 3 | Truly unknown | 4 | Not asked / Not collected |
| 1 | Yes                       |                                  |                                           |                                                                                                                                                                                  |   |     |   |    |   |               |   |                           |
| 2 | No                        |                                  |                                           |                                                                                                                                                                                  |   |     |   |    |   |               |   |                           |
| 3 | Truly unknown             |                                  |                                           |                                                                                                                                                                                  |   |     |   |    |   |               |   |                           |
| 4 | Not asked / Not collected |                                  |                                           |                                                                                                                                                                                  |   |     |   |    |   |               |   |                           |



|    |                               |                               |                                                                                                                                                                                  |   |     |   |    |   |               |   |                           |
|----|-------------------------------|-------------------------------|----------------------------------------------------------------------------------------------------------------------------------------------------------------------------------|---|-----|---|----|---|---------------|---|---------------------------|
| 89 | [pulmonary_hypertension_ever] | Pulmonary Hypertension (Ever) | radio <table><tr><td>1</td><td>Yes</td></tr><tr><td>2</td><td>No</td></tr><tr><td>3</td><td>Truly unknown</td></tr><tr><td>4</td><td>Not asked / Not collected</td></tr></table> | 1 | Yes | 2 | No | 3 | Truly unknown | 4 | Not asked / Not collected |
| 1  | Yes                           |                               |                                                                                                                                                                                  |   |     |   |    |   |               |   |                           |
| 2  | No                            |                               |                                                                                                                                                                                  |   |     |   |    |   |               |   |                           |
| 3  | Truly unknown                 |                               |                                                                                                                                                                                  |   |     |   |    |   |               |   |                           |
| 4  | Not asked / Not collected     |                               |                                                                                                                                                                                  |   |     |   |    |   |               |   |                           |
| 90 | [stroke]                      | Stroke                        | radio <table><tr><td>1</td><td>Yes</td></tr><tr><td>2</td><td>No</td></tr><tr><td>3</td><td>Truly unknown</td></tr><tr><td>4</td><td>Not asked / Not collected</td></tr></table> | 1 | Yes | 2 | No | 3 | Truly unknown | 4 | Not asked / Not collected |
| 1  | Yes                           |                               |                                                                                                                                                                                  |   |     |   |    |   |               |   |                           |
| 2  | No                            |                               |                                                                                                                                                                                  |   |     |   |    |   |               |   |                           |
| 3  | Truly unknown                 |                               |                                                                                                                                                                                  |   |     |   |    |   |               |   |                           |
| 4  | Not asked / Not collected     |                               |                                                                                                                                                                                  |   |     |   |    |   |               |   |                           |
| 91 | [stroke_ever]                 | Stroke (Ever)                 | radio <table><tr><td>1</td><td>Yes</td></tr><tr><td>2</td><td>No</td></tr><tr><td>3</td><td>Truly unknown</td></tr><tr><td>4</td><td>Not asked / Not collected</td></tr></table> | 1 | Yes | 2 | No | 3 | Truly unknown | 4 | Not asked / Not collected |
| 1  | Yes                           |                               |                                                                                                                                                                                  |   |     |   |    |   |               |   |                           |
| 2  | No                            |                               |                                                                                                                                                                                  |   |     |   |    |   |               |   |                           |
| 3  | Truly unknown                 |                               |                                                                                                                                                                                  |   |     |   |    |   |               |   |                           |
| 4  | Not asked / Not collected     |                               |                                                                                                                                                                                  |   |     |   |    |   |               |   |                           |
| 92 | [priapism]                    | Priapism                      | radio <table><tr><td>1</td><td>Yes</td></tr><tr><td>2</td><td>No</td></tr><tr><td>3</td><td>Truly unknown</td></tr><tr><td>4</td><td>Not asked / Not collected</td></tr></table> | 1 | Yes | 2 | No | 3 | Truly unknown | 4 | Not asked / Not collected |
| 1  | Yes                           |                               |                                                                                                                                                                                  |   |     |   |    |   |               |   |                           |
| 2  | No                            |                               |                                                                                                                                                                                  |   |     |   |    |   |               |   |                           |
| 3  | Truly unknown                 |                               |                                                                                                                                                                                  |   |     |   |    |   |               |   |                           |
| 4  | Not asked / Not collected     |                               |                                                                                                                                                                                  |   |     |   |    |   |               |   |                           |
| 93 | [priapism_ever]               | Priapism (Ever)               | radio <table><tr><td>1</td><td>Yes</td></tr><tr><td>2</td><td>No</td></tr><tr><td>3</td><td>Truly unknown</td></tr><tr><td>4</td><td>Not asked / Not collected</td></tr></table> | 1 | Yes | 2 | No | 3 | Truly unknown | 4 | Not asked / Not collected |
| 1  | Yes                           |                               |                                                                                                                                                                                  |   |     |   |    |   |               |   |                           |
| 2  | No                            |                               |                                                                                                                                                                                  |   |     |   |    |   |               |   |                           |
| 3  | Truly unknown                 |                               |                                                                                                                                                                                  |   |     |   |    |   |               |   |                           |
| 4  | Not asked / Not collected     |                               |                                                                                                                                                                                  |   |     |   |    |   |               |   |                           |
| 94 | [renal_complications]         | Renal Complications           | radio <table><tr><td>1</td><td>Yes</td></tr><tr><td>2</td><td>No</td></tr><tr><td>3</td><td>Truly unknown</td></tr><tr><td>4</td><td>Not asked / Not collected</td></tr></table> | 1 | Yes | 2 | No | 3 | Truly unknown | 4 | Not asked / Not collected |
| 1  | Yes                           |                               |                                                                                                                                                                                  |   |     |   |    |   |               |   |                           |
| 2  | No                            |                               |                                                                                                                                                                                  |   |     |   |    |   |               |   |                           |
| 3  | Truly unknown                 |                               |                                                                                                                                                                                  |   |     |   |    |   |               |   |                           |
| 4  | Not asked / Not collected     |                               |                                                                                                                                                                                  |   |     |   |    |   |               |   |                           |
| 95 | [renal_complications_ever]    | Renal Complications (Ever)    | radio <table><tr><td>1</td><td>Yes</td></tr><tr><td>2</td><td>No</td></tr><tr><td>3</td><td>Truly unknown</td></tr><tr><td>4</td><td>Not asked / Not collected</td></tr></table> | 1 | Yes | 2 | No | 3 | Truly unknown | 4 | Not asked / Not collected |
| 1  | Yes                           |                               |                                                                                                                                                                                  |   |     |   |    |   |               |   |                           |
| 2  | No                            |                               |                                                                                                                                                                                  |   |     |   |    |   |               |   |                           |
| 3  | Truly unknown                 |                               |                                                                                                                                                                                  |   |     |   |    |   |               |   |                           |
| 4  | Not asked / Not collected     |                               |                                                                                                                                                                                  |   |     |   |    |   |               |   |                           |
| 96 | [jaundice]                    | Jaundice                      | radio <table><tr><td>1</td><td>Yes</td></tr><tr><td>2</td><td>No</td></tr><tr><td>3</td><td>Truly unknown</td></tr><tr><td>4</td><td>Not asked / Not collected</td></tr></table> | 1 | Yes | 2 | No | 3 | Truly unknown | 4 | Not asked / Not collected |
| 1  | Yes                           |                               |                                                                                                                                                                                  |   |     |   |    |   |               |   |                           |
| 2  | No                            |                               |                                                                                                                                                                                  |   |     |   |    |   |               |   |                           |
| 3  | Truly unknown                 |                               |                                                                                                                                                                                  |   |     |   |    |   |               |   |                           |
| 4  | Not asked / Not collected     |                               |                                                                                                                                                                                  |   |     |   |    |   |               |   |                           |
| 97 | [jaundice_ever]               | Jaundice (Ever)               | radio <table><tr><td>1</td><td>Yes</td></tr><tr><td>2</td><td>No</td></tr><tr><td>3</td><td>Truly unknown</td></tr><tr><td>4</td><td>Not asked / Not collected</td></tr></table> | 1 | Yes | 2 | No | 3 | Truly unknown | 4 | Not asked / Not collected |
| 1  | Yes                           |                               |                                                                                                                                                                                  |   |     |   |    |   |               |   |                           |
| 2  | No                            |                               |                                                                                                                                                                                  |   |     |   |    |   |               |   |                           |
| 3  | Truly unknown                 |                               |                                                                                                                                                                                  |   |     |   |    |   |               |   |                           |
| 4  | Not asked / Not collected     |                               |                                                                                                                                                                                  |   |     |   |    |   |               |   |                           |

|                                                |                                                                                        |                                |                                                                   |                                                                                                                                                                                                                                                                                                                                                                                                                                                                                                                                                                                                                                                                                                                                                                                                                                                                                                                                                                                                                                                                                                |               |                                                                                        |   |                   |   |                             |   |              |   |                    |   |                       |   |                         |       |                      |   |                         |   |                       |    |                    |    |                     |    |                     |    |                    |    |                          |    |                 |    |                         |    |                         |    |                          |    |                           |    |                          |
|------------------------------------------------|----------------------------------------------------------------------------------------|--------------------------------|-------------------------------------------------------------------|------------------------------------------------------------------------------------------------------------------------------------------------------------------------------------------------------------------------------------------------------------------------------------------------------------------------------------------------------------------------------------------------------------------------------------------------------------------------------------------------------------------------------------------------------------------------------------------------------------------------------------------------------------------------------------------------------------------------------------------------------------------------------------------------------------------------------------------------------------------------------------------------------------------------------------------------------------------------------------------------------------------------------------------------------------------------------------------------|---------------|----------------------------------------------------------------------------------------|---|-------------------|---|-----------------------------|---|--------------|---|--------------------|---|-----------------------|---|-------------------------|-------|----------------------|---|-------------------------|---|-----------------------|----|--------------------|----|---------------------|----|---------------------|----|--------------------|----|--------------------------|----|-----------------|----|-------------------------|----|-------------------------|----|--------------------------|----|---------------------------|----|--------------------------|
|                                                | 98                                                                                     | [ <b>abnorm_appetite</b> ]     | Abnormal Appetite                                                 | radio <table><tr><td>1</td><td>Yes</td></tr><tr><td>2</td><td>No</td></tr><tr><td>4</td><td>Not asked / Not collected</td></tr></table>                                                                                                                                                                                                                                                                                                                                                                                                                                                                                                                                                                                                                                                                                                                                                                                                                                                                                                                                                        | 1             | Yes                                                                                    | 2 | No                | 4 | Not asked / Not collected   |   |              |   |                    |   |                       |   |                         |       |                      |   |                         |   |                       |    |                    |    |                     |    |                     |    |                    |    |                          |    |                 |    |                         |    |                         |    |                          |    |                           |    |                          |
| 1                                              | Yes                                                                                    |                                |                                                                   |                                                                                                                                                                                                                                                                                                                                                                                                                                                                                                                                                                                                                                                                                                                                                                                                                                                                                                                                                                                                                                                                                                |               |                                                                                        |   |                   |   |                             |   |              |   |                    |   |                       |   |                         |       |                      |   |                         |   |                       |    |                    |    |                     |    |                     |    |                    |    |                          |    |                 |    |                         |    |                         |    |                          |    |                           |    |                          |
| 2                                              | No                                                                                     |                                |                                                                   |                                                                                                                                                                                                                                                                                                                                                                                                                                                                                                                                                                                                                                                                                                                                                                                                                                                                                                                                                                                                                                                                                                |               |                                                                                        |   |                   |   |                             |   |              |   |                    |   |                       |   |                         |       |                      |   |                         |   |                       |    |                    |    |                     |    |                     |    |                    |    |                          |    |                 |    |                         |    |                         |    |                          |    |                           |    |                          |
| 4                                              | Not asked / Not collected                                                              |                                |                                                                   |                                                                                                                                                                                                                                                                                                                                                                                                                                                                                                                                                                                                                                                                                                                                                                                                                                                                                                                                                                                                                                                                                                |               |                                                                                        |   |                   |   |                             |   |              |   |                    |   |                       |   |                         |       |                      |   |                         |   |                       |    |                    |    |                     |    |                     |    |                    |    |                          |    |                 |    |                         |    |                         |    |                          |    |                           |    |                          |
|                                                | 99                                                                                     | [ <b>abnorm_stool_freq</b> ]   | Abnormal Stool Frequency                                          | radio <table><tr><td>1</td><td>Yes</td></tr><tr><td>2</td><td>No</td></tr><tr><td>4</td><td>Not asked / Not collected</td></tr></table>                                                                                                                                                                                                                                                                                                                                                                                                                                                                                                                                                                                                                                                                                                                                                                                                                                                                                                                                                        | 1             | Yes                                                                                    | 2 | No                | 4 | Not asked / Not collected   |   |              |   |                    |   |                       |   |                         |       |                      |   |                         |   |                       |    |                    |    |                     |    |                     |    |                    |    |                          |    |                 |    |                         |    |                         |    |                          |    |                           |    |                          |
| 1                                              | Yes                                                                                    |                                |                                                                   |                                                                                                                                                                                                                                                                                                                                                                                                                                                                                                                                                                                                                                                                                                                                                                                                                                                                                                                                                                                                                                                                                                |               |                                                                                        |   |                   |   |                             |   |              |   |                    |   |                       |   |                         |       |                      |   |                         |   |                       |    |                    |    |                     |    |                     |    |                    |    |                          |    |                 |    |                         |    |                         |    |                          |    |                           |    |                          |
| 2                                              | No                                                                                     |                                |                                                                   |                                                                                                                                                                                                                                                                                                                                                                                                                                                                                                                                                                                                                                                                                                                                                                                                                                                                                                                                                                                                                                                                                                |               |                                                                                        |   |                   |   |                             |   |              |   |                    |   |                       |   |                         |       |                      |   |                         |   |                       |    |                    |    |                     |    |                     |    |                    |    |                          |    |                 |    |                         |    |                         |    |                          |    |                           |    |                          |
| 4                                              | Not asked / Not collected                                                              |                                |                                                                   |                                                                                                                                                                                                                                                                                                                                                                                                                                                                                                                                                                                                                                                                                                                                                                                                                                                                                                                                                                                                                                                                                                |               |                                                                                        |   |                   |   |                             |   |              |   |                    |   |                       |   |                         |       |                      |   |                         |   |                       |    |                    |    |                     |    |                     |    |                    |    |                          |    |                 |    |                         |    |                         |    |                          |    |                           |    |                          |
|                                                | 100                                                                                    | [ <b>screening_complete</b> ]  | Section Header: <i>Form Status</i><br>Complete?                   | dropdown <table><tr><td>0</td><td>Incomplete</td></tr><tr><td>1</td><td>Unverified</td></tr><tr><td>2</td><td>Complete</td></tr></table>                                                                                                                                                                                                                                                                                                                                                                                                                                                                                                                                                                                                                                                                                                                                                                                                                                                                                                                                                       | 0             | Incomplete                                                                             | 1 | Unverified        | 2 | Complete                    |   |              |   |                    |   |                       |   |                         |       |                      |   |                         |   |                       |    |                    |    |                     |    |                     |    |                    |    |                          |    |                 |    |                         |    |                         |    |                          |    |                           |    |                          |
| 0                                              | Incomplete                                                                             |                                |                                                                   |                                                                                                                                                                                                                                                                                                                                                                                                                                                                                                                                                                                                                                                                                                                                                                                                                                                                                                                                                                                                                                                                                                |               |                                                                                        |   |                   |   |                             |   |              |   |                    |   |                       |   |                         |       |                      |   |                         |   |                       |    |                    |    |                     |    |                     |    |                    |    |                          |    |                 |    |                         |    |                         |    |                          |    |                           |    |                          |
| 1                                              | Unverified                                                                             |                                |                                                                   |                                                                                                                                                                                                                                                                                                                                                                                                                                                                                                                                                                                                                                                                                                                                                                                                                                                                                                                                                                                                                                                                                                |               |                                                                                        |   |                   |   |                             |   |              |   |                    |   |                       |   |                         |       |                      |   |                         |   |                       |    |                    |    |                     |    |                     |    |                    |    |                          |    |                 |    |                         |    |                         |    |                          |    |                           |    |                          |
| 2                                              | Complete                                                                               |                                |                                                                   |                                                                                                                                                                                                                                                                                                                                                                                                                                                                                                                                                                                                                                                                                                                                                                                                                                                                                                                                                                                                                                                                                                |               |                                                                                        |   |                   |   |                             |   |              |   |                    |   |                       |   |                         |       |                      |   |                         |   |                       |    |                    |    |                     |    |                     |    |                    |    |                          |    |                 |    |                         |    |                         |    |                          |    |                           |    |                          |
| Instrument: <b>Demographics</b> (demographics) |                                                                                        |                                |                                                                   |                                                                                                                                                                                                                                                                                                                                                                                                                                                                                                                                                                                                                                                                                                                                                                                                                                                                                                                                                                                                                                                                                                |               |                                                                                        |   |                   |   |                             |   |              |   |                    |   |                       |   |                         |       |                      |   |                         |   |                       |    |                    |    |                     |    |                     |    |                    |    |                          |    |                 |    |                         |    |                         |    |                          |    |                           |    |                          |
|                                                | 101                                                                                    | [ <b>first_name1</b> ]         | Section Header: <i>Patient Details</i><br>First Name              | text                                                                                                                                                                                                                                                                                                                                                                                                                                                                                                                                                                                                                                                                                                                                                                                                                                                                                                                                                                                                                                                                                           |               |                                                                                        |   |                   |   |                             |   |              |   |                    |   |                       |   |                         |       |                      |   |                         |   |                       |    |                    |    |                     |    |                     |    |                    |    |                          |    |                 |    |                         |    |                         |    |                          |    |                           |    |                          |
|                                                | 102                                                                                    | [ <b>medical_record_id</b> ]   | Electronic Medical Record ID/ Patient Medical Record ID           | text                                                                                                                                                                                                                                                                                                                                                                                                                                                                                                                                                                                                                                                                                                                                                                                                                                                                                                                                                                                                                                                                                           |               |                                                                                        |   |                   |   |                             |   |              |   |                    |   |                       |   |                         |       |                      |   |                         |   |                       |    |                    |    |                     |    |                     |    |                    |    |                          |    |                 |    |                         |    |                         |    |                          |    |                           |    |                          |
|                                                | 103                                                                                    | [ <b>data_source</b> ]         | Where was the data collected ?                                    | text                                                                                                                                                                                                                                                                                                                                                                                                                                                                                                                                                                                                                                                                                                                                                                                                                                                                                                                                                                                                                                                                                           |               |                                                                                        |   |                   |   |                             |   |              |   |                    |   |                       |   |                         |       |                      |   |                         |   |                       |    |                    |    |                     |    |                     |    |                    |    |                          |    |                 |    |                         |    |                         |    |                          |    |                           |    |                          |
|                                                | 104                                                                                    | [ <b>data_source_country</b> ] | Country where the data was collected ?                            | text <table><tr><td>SELECT record</td><td>value FROM redcap_data WHERE project_id = 76 AND field_name = 'country' ORDER BY value</td></tr></table>                                                                                                                                                                                                                                                                                                                                                                                                                                                                                                                                                                                                                                                                                                                                                                                                                                                                                                                                             | SELECT record | value FROM redcap_data WHERE project_id = 76 AND field_name = 'country' ORDER BY value |   |                   |   |                             |   |              |   |                    |   |                       |   |                         |       |                      |   |                         |   |                       |    |                    |    |                     |    |                     |    |                    |    |                          |    |                 |    |                         |    |                         |    |                          |    |                           |    |                          |
| SELECT record                                  | value FROM redcap_data WHERE project_id = 76 AND field_name = 'country' ORDER BY value |                                |                                                                   |                                                                                                                                                                                                                                                                                                                                                                                                                                                                                                                                                                                                                                                                                                                                                                                                                                                                                                                                                                                                                                                                                                |               |                                                                                        |   |                   |   |                             |   |              |   |                    |   |                       |   |                         |       |                      |   |                         |   |                       |    |                    |    |                     |    |                     |    |                    |    |                          |    |                 |    |                         |    |                         |    |                          |    |                           |    |                          |
|                                                | 105                                                                                    | [ <b>study_type</b> ]          | Type of study the patient is enrolled in                          | dropdown <table><tr><td>1</td><td>Meta-Analysis</td></tr><tr><td>2</td><td>Systematic Review</td></tr><tr><td>3</td><td>Randomized Controlled Trial</td></tr><tr><td>4</td><td>Cohort Study</td></tr><tr><td>5</td><td>Case-control Study</td></tr><tr><td>6</td><td>Cross-sectional study</td></tr><tr><td>7</td><td>Case Reports and Series</td></tr><tr><td>Ideas</td><td>Editorials, Opinions</td></tr><tr><td>8</td><td>Animal Research Studies</td></tr><tr><td>9</td><td>Test-tube Lab Researc</td></tr><tr><td>10</td><td>Treatment Research</td></tr><tr><td>11</td><td>Prevention Research</td></tr><tr><td>12</td><td>Diagnostic Research</td></tr><tr><td>13</td><td>Screening Research</td></tr><tr><td>14</td><td>Quality of Life Research</td></tr><tr><td>15</td><td>Genetic studies</td></tr><tr><td>16</td><td>Epidemiological studies</td></tr><tr><td>17</td><td>Phase I Clinical trials</td></tr><tr><td>18</td><td>Phase II Clinical trials</td></tr><tr><td>19</td><td>Phase III Clinical trials</td></tr><tr><td>20</td><td>Phase IV Clinical trials</td></tr></table> | 1             | Meta-Analysis                                                                          | 2 | Systematic Review | 3 | Randomized Controlled Trial | 4 | Cohort Study | 5 | Case-control Study | 6 | Cross-sectional study | 7 | Case Reports and Series | Ideas | Editorials, Opinions | 8 | Animal Research Studies | 9 | Test-tube Lab Researc | 10 | Treatment Research | 11 | Prevention Research | 12 | Diagnostic Research | 13 | Screening Research | 14 | Quality of Life Research | 15 | Genetic studies | 16 | Epidemiological studies | 17 | Phase I Clinical trials | 18 | Phase II Clinical trials | 19 | Phase III Clinical trials | 20 | Phase IV Clinical trials |
| 1                                              | Meta-Analysis                                                                          |                                |                                                                   |                                                                                                                                                                                                                                                                                                                                                                                                                                                                                                                                                                                                                                                                                                                                                                                                                                                                                                                                                                                                                                                                                                |               |                                                                                        |   |                   |   |                             |   |              |   |                    |   |                       |   |                         |       |                      |   |                         |   |                       |    |                    |    |                     |    |                     |    |                    |    |                          |    |                 |    |                         |    |                         |    |                          |    |                           |    |                          |
| 2                                              | Systematic Review                                                                      |                                |                                                                   |                                                                                                                                                                                                                                                                                                                                                                                                                                                                                                                                                                                                                                                                                                                                                                                                                                                                                                                                                                                                                                                                                                |               |                                                                                        |   |                   |   |                             |   |              |   |                    |   |                       |   |                         |       |                      |   |                         |   |                       |    |                    |    |                     |    |                     |    |                    |    |                          |    |                 |    |                         |    |                         |    |                          |    |                           |    |                          |
| 3                                              | Randomized Controlled Trial                                                            |                                |                                                                   |                                                                                                                                                                                                                                                                                                                                                                                                                                                                                                                                                                                                                                                                                                                                                                                                                                                                                                                                                                                                                                                                                                |               |                                                                                        |   |                   |   |                             |   |              |   |                    |   |                       |   |                         |       |                      |   |                         |   |                       |    |                    |    |                     |    |                     |    |                    |    |                          |    |                 |    |                         |    |                         |    |                          |    |                           |    |                          |
| 4                                              | Cohort Study                                                                           |                                |                                                                   |                                                                                                                                                                                                                                                                                                                                                                                                                                                                                                                                                                                                                                                                                                                                                                                                                                                                                                                                                                                                                                                                                                |               |                                                                                        |   |                   |   |                             |   |              |   |                    |   |                       |   |                         |       |                      |   |                         |   |                       |    |                    |    |                     |    |                     |    |                    |    |                          |    |                 |    |                         |    |                         |    |                          |    |                           |    |                          |
| 5                                              | Case-control Study                                                                     |                                |                                                                   |                                                                                                                                                                                                                                                                                                                                                                                                                                                                                                                                                                                                                                                                                                                                                                                                                                                                                                                                                                                                                                                                                                |               |                                                                                        |   |                   |   |                             |   |              |   |                    |   |                       |   |                         |       |                      |   |                         |   |                       |    |                    |    |                     |    |                     |    |                    |    |                          |    |                 |    |                         |    |                         |    |                          |    |                           |    |                          |
| 6                                              | Cross-sectional study                                                                  |                                |                                                                   |                                                                                                                                                                                                                                                                                                                                                                                                                                                                                                                                                                                                                                                                                                                                                                                                                                                                                                                                                                                                                                                                                                |               |                                                                                        |   |                   |   |                             |   |              |   |                    |   |                       |   |                         |       |                      |   |                         |   |                       |    |                    |    |                     |    |                     |    |                    |    |                          |    |                 |    |                         |    |                         |    |                          |    |                           |    |                          |
| 7                                              | Case Reports and Series                                                                |                                |                                                                   |                                                                                                                                                                                                                                                                                                                                                                                                                                                                                                                                                                                                                                                                                                                                                                                                                                                                                                                                                                                                                                                                                                |               |                                                                                        |   |                   |   |                             |   |              |   |                    |   |                       |   |                         |       |                      |   |                         |   |                       |    |                    |    |                     |    |                     |    |                    |    |                          |    |                 |    |                         |    |                         |    |                          |    |                           |    |                          |
| Ideas                                          | Editorials, Opinions                                                                   |                                |                                                                   |                                                                                                                                                                                                                                                                                                                                                                                                                                                                                                                                                                                                                                                                                                                                                                                                                                                                                                                                                                                                                                                                                                |               |                                                                                        |   |                   |   |                             |   |              |   |                    |   |                       |   |                         |       |                      |   |                         |   |                       |    |                    |    |                     |    |                     |    |                    |    |                          |    |                 |    |                         |    |                         |    |                          |    |                           |    |                          |
| 8                                              | Animal Research Studies                                                                |                                |                                                                   |                                                                                                                                                                                                                                                                                                                                                                                                                                                                                                                                                                                                                                                                                                                                                                                                                                                                                                                                                                                                                                                                                                |               |                                                                                        |   |                   |   |                             |   |              |   |                    |   |                       |   |                         |       |                      |   |                         |   |                       |    |                    |    |                     |    |                     |    |                    |    |                          |    |                 |    |                         |    |                         |    |                          |    |                           |    |                          |
| 9                                              | Test-tube Lab Researc                                                                  |                                |                                                                   |                                                                                                                                                                                                                                                                                                                                                                                                                                                                                                                                                                                                                                                                                                                                                                                                                                                                                                                                                                                                                                                                                                |               |                                                                                        |   |                   |   |                             |   |              |   |                    |   |                       |   |                         |       |                      |   |                         |   |                       |    |                    |    |                     |    |                     |    |                    |    |                          |    |                 |    |                         |    |                         |    |                          |    |                           |    |                          |
| 10                                             | Treatment Research                                                                     |                                |                                                                   |                                                                                                                                                                                                                                                                                                                                                                                                                                                                                                                                                                                                                                                                                                                                                                                                                                                                                                                                                                                                                                                                                                |               |                                                                                        |   |                   |   |                             |   |              |   |                    |   |                       |   |                         |       |                      |   |                         |   |                       |    |                    |    |                     |    |                     |    |                    |    |                          |    |                 |    |                         |    |                         |    |                          |    |                           |    |                          |
| 11                                             | Prevention Research                                                                    |                                |                                                                   |                                                                                                                                                                                                                                                                                                                                                                                                                                                                                                                                                                                                                                                                                                                                                                                                                                                                                                                                                                                                                                                                                                |               |                                                                                        |   |                   |   |                             |   |              |   |                    |   |                       |   |                         |       |                      |   |                         |   |                       |    |                    |    |                     |    |                     |    |                    |    |                          |    |                 |    |                         |    |                         |    |                          |    |                           |    |                          |
| 12                                             | Diagnostic Research                                                                    |                                |                                                                   |                                                                                                                                                                                                                                                                                                                                                                                                                                                                                                                                                                                                                                                                                                                                                                                                                                                                                                                                                                                                                                                                                                |               |                                                                                        |   |                   |   |                             |   |              |   |                    |   |                       |   |                         |       |                      |   |                         |   |                       |    |                    |    |                     |    |                     |    |                    |    |                          |    |                 |    |                         |    |                         |    |                          |    |                           |    |                          |
| 13                                             | Screening Research                                                                     |                                |                                                                   |                                                                                                                                                                                                                                                                                                                                                                                                                                                                                                                                                                                                                                                                                                                                                                                                                                                                                                                                                                                                                                                                                                |               |                                                                                        |   |                   |   |                             |   |              |   |                    |   |                       |   |                         |       |                      |   |                         |   |                       |    |                    |    |                     |    |                     |    |                    |    |                          |    |                 |    |                         |    |                         |    |                          |    |                           |    |                          |
| 14                                             | Quality of Life Research                                                               |                                |                                                                   |                                                                                                                                                                                                                                                                                                                                                                                                                                                                                                                                                                                                                                                                                                                                                                                                                                                                                                                                                                                                                                                                                                |               |                                                                                        |   |                   |   |                             |   |              |   |                    |   |                       |   |                         |       |                      |   |                         |   |                       |    |                    |    |                     |    |                     |    |                    |    |                          |    |                 |    |                         |    |                         |    |                          |    |                           |    |                          |
| 15                                             | Genetic studies                                                                        |                                |                                                                   |                                                                                                                                                                                                                                                                                                                                                                                                                                                                                                                                                                                                                                                                                                                                                                                                                                                                                                                                                                                                                                                                                                |               |                                                                                        |   |                   |   |                             |   |              |   |                    |   |                       |   |                         |       |                      |   |                         |   |                       |    |                    |    |                     |    |                     |    |                    |    |                          |    |                 |    |                         |    |                         |    |                          |    |                           |    |                          |
| 16                                             | Epidemiological studies                                                                |                                |                                                                   |                                                                                                                                                                                                                                                                                                                                                                                                                                                                                                                                                                                                                                                                                                                                                                                                                                                                                                                                                                                                                                                                                                |               |                                                                                        |   |                   |   |                             |   |              |   |                    |   |                       |   |                         |       |                      |   |                         |   |                       |    |                    |    |                     |    |                     |    |                    |    |                          |    |                 |    |                         |    |                         |    |                          |    |                           |    |                          |
| 17                                             | Phase I Clinical trials                                                                |                                |                                                                   |                                                                                                                                                                                                                                                                                                                                                                                                                                                                                                                                                                                                                                                                                                                                                                                                                                                                                                                                                                                                                                                                                                |               |                                                                                        |   |                   |   |                             |   |              |   |                    |   |                       |   |                         |       |                      |   |                         |   |                       |    |                    |    |                     |    |                     |    |                    |    |                          |    |                 |    |                         |    |                         |    |                          |    |                           |    |                          |
| 18                                             | Phase II Clinical trials                                                               |                                |                                                                   |                                                                                                                                                                                                                                                                                                                                                                                                                                                                                                                                                                                                                                                                                                                                                                                                                                                                                                                                                                                                                                                                                                |               |                                                                                        |   |                   |   |                             |   |              |   |                    |   |                       |   |                         |       |                      |   |                         |   |                       |    |                    |    |                     |    |                     |    |                    |    |                          |    |                 |    |                         |    |                         |    |                          |    |                           |    |                          |
| 19                                             | Phase III Clinical trials                                                              |                                |                                                                   |                                                                                                                                                                                                                                                                                                                                                                                                                                                                                                                                                                                                                                                                                                                                                                                                                                                                                                                                                                                                                                                                                                |               |                                                                                        |   |                   |   |                             |   |              |   |                    |   |                       |   |                         |       |                      |   |                         |   |                       |    |                    |    |                     |    |                     |    |                    |    |                          |    |                 |    |                         |    |                         |    |                          |    |                           |    |                          |
| 20                                             | Phase IV Clinical trials                                                               |                                |                                                                   |                                                                                                                                                                                                                                                                                                                                                                                                                                                                                                                                                                                                                                                                                                                                                                                                                                                                                                                                                                                                                                                                                                |               |                                                                                        |   |                   |   |                             |   |              |   |                    |   |                       |   |                         |       |                      |   |                         |   |                       |    |                    |    |                     |    |                     |    |                    |    |                          |    |                 |    |                         |    |                         |    |                          |    |                           |    |                          |
|                                                | 106                                                                                    | [ <b>current_age_demo</b> ]    | Current age in years<br>Current age from birth                    | calc<br>Calculation: datediff('today',[date_of_birth],"y","dmy")                                                                                                                                                                                                                                                                                                                                                                                                                                                                                                                                                                                                                                                                                                                                                                                                                                                                                                                                                                                                                               |               |                                                                                        |   |                   |   |                             |   |              |   |                    |   |                       |   |                         |       |                      |   |                         |   |                       |    |                    |    |                     |    |                     |    |                    |    |                          |    |                 |    |                         |    |                         |    |                          |    |                           |    |                          |
|                                                | 107                                                                                    | [ <b>registration_date</b> ]   | Date on which the registration was done. (MM/DD/YYYY)             | text (date_mdy)                                                                                                                                                                                                                                                                                                                                                                                                                                                                                                                                                                                                                                                                                                                                                                                                                                                                                                                                                                                                                                                                                |               |                                                                                        |   |                   |   |                             |   |              |   |                    |   |                       |   |                         |       |                      |   |                         |   |                       |    |                    |    |                     |    |                     |    |                    |    |                          |    |                 |    |                         |    |                         |    |                          |    |                           |    |                          |
|                                                | 108                                                                                    | [ <b>interview_age</b> ]       | Age in months at the time of the interview/test/sampling/imaging. | calc<br>Calculation: datediff([date_of_birth],[registration_date],"M","dmy")                                                                                                                                                                                                                                                                                                                                                                                                                                                                                                                                                                                                                                                                                                                                                                                                                                                                                                                                                                                                                   |               |                                                                                        |   |                   |   |                             |   |              |   |                    |   |                       |   |                         |       |                      |   |                         |   |                       |    |                    |    |                     |    |                     |    |                    |    |                          |    |                 |    |                         |    |                         |    |                          |    |                           |    |                          |

|     |                                                                  |                                                                                                                                                                                                                                                                                                              |                                                                                                                                                                                                                                                                                                                                                                                                                                                                                                                                                                                                                                                                                                                                                                                                                                                                                                                                                                                                                                                                                                                                                                                                                                                                                                            |     |                                  |     |                                                |   |           |   |                      |   |           |   |                    |   |           |   |           |   |           |   |           |    |            |    |            |    |                        |    |                      |    |                   |    |                         |    |                                                                  |    |                                    |    |                                              |    |                                                   |    |                                                        |    |                                     |    |         |    |            |
|-----|------------------------------------------------------------------|--------------------------------------------------------------------------------------------------------------------------------------------------------------------------------------------------------------------------------------------------------------------------------------------------------------|------------------------------------------------------------------------------------------------------------------------------------------------------------------------------------------------------------------------------------------------------------------------------------------------------------------------------------------------------------------------------------------------------------------------------------------------------------------------------------------------------------------------------------------------------------------------------------------------------------------------------------------------------------------------------------------------------------------------------------------------------------------------------------------------------------------------------------------------------------------------------------------------------------------------------------------------------------------------------------------------------------------------------------------------------------------------------------------------------------------------------------------------------------------------------------------------------------------------------------------------------------------------------------------------------------|-----|----------------------------------|-----|------------------------------------------------|---|-----------|---|----------------------|---|-----------|---|--------------------|---|-----------|---|-----------|---|-----------|---|-----------|----|------------|----|------------|----|------------------------|----|----------------------|----|-------------------|----|-------------------------|----|------------------------------------------------------------------|----|------------------------------------|----|----------------------------------------------|----|---------------------------------------------------|----|--------------------------------------------------------|----|-------------------------------------|----|---------|----|------------|
| 109 | [ <b>current_marital_status_opposite_sex</b> ]                   | What is your current marital or cohabiting status?<br><i>PX010902   phenx_current_marital_status</i>                                                                                                                                                                                                         | radio <table border="1"> <tr><td>1</td><td>Married</td></tr> <tr><td>2</td><td>Not married but living together with a partner</td></tr> <tr><td>3</td><td>Widowed</td></tr> <tr><td>4</td><td>Divorced or annulled</td></tr> <tr><td>5</td><td>Separated</td></tr> <tr><td>6</td><td>Never been married</td></tr> </table>                                                                                                                                                                                                                                                                                                                                                                                                                                                                                                                                                                                                                                                                                                                                                                                                                                                                                                                                                                                 | 1   | Married                          | 2   | Not married but living together with a partner | 3 | Widowed   | 4 | Divorced or annulled | 5 | Separated | 6 | Never been married |   |           |   |           |   |           |   |           |    |            |    |            |    |                        |    |                      |    |                   |    |                         |    |                                                                  |    |                                    |    |                                              |    |                                                   |    |                                                        |    |                                     |    |         |    |            |
| 1   | Married                                                          |                                                                                                                                                                                                                                                                                                              |                                                                                                                                                                                                                                                                                                                                                                                                                                                                                                                                                                                                                                                                                                                                                                                                                                                                                                                                                                                                                                                                                                                                                                                                                                                                                                            |     |                                  |     |                                                |   |           |   |                      |   |           |   |                    |   |           |   |           |   |           |   |           |    |            |    |            |    |                        |    |                      |    |                   |    |                         |    |                                                                  |    |                                    |    |                                              |    |                                                   |    |                                                        |    |                                     |    |         |    |            |
| 2   | Not married but living together with a partner                   |                                                                                                                                                                                                                                                                                                              |                                                                                                                                                                                                                                                                                                                                                                                                                                                                                                                                                                                                                                                                                                                                                                                                                                                                                                                                                                                                                                                                                                                                                                                                                                                                                                            |     |                                  |     |                                                |   |           |   |                      |   |           |   |                    |   |           |   |           |   |           |   |           |    |            |    |            |    |                        |    |                      |    |                   |    |                         |    |                                                                  |    |                                    |    |                                              |    |                                                   |    |                                                        |    |                                     |    |         |    |            |
| 3   | Widowed                                                          |                                                                                                                                                                                                                                                                                                              |                                                                                                                                                                                                                                                                                                                                                                                                                                                                                                                                                                                                                                                                                                                                                                                                                                                                                                                                                                                                                                                                                                                                                                                                                                                                                                            |     |                                  |     |                                                |   |           |   |                      |   |           |   |                    |   |           |   |           |   |           |   |           |    |            |    |            |    |                        |    |                      |    |                   |    |                         |    |                                                                  |    |                                    |    |                                              |    |                                                   |    |                                                        |    |                                     |    |         |    |            |
| 4   | Divorced or annulled                                             |                                                                                                                                                                                                                                                                                                              |                                                                                                                                                                                                                                                                                                                                                                                                                                                                                                                                                                                                                                                                                                                                                                                                                                                                                                                                                                                                                                                                                                                                                                                                                                                                                                            |     |                                  |     |                                                |   |           |   |                      |   |           |   |                    |   |           |   |           |   |           |   |           |    |            |    |            |    |                        |    |                      |    |                   |    |                         |    |                                                                  |    |                                    |    |                                              |    |                                                   |    |                                                        |    |                                     |    |         |    |            |
| 5   | Separated                                                        |                                                                                                                                                                                                                                                                                                              |                                                                                                                                                                                                                                                                                                                                                                                                                                                                                                                                                                                                                                                                                                                                                                                                                                                                                                                                                                                                                                                                                                                                                                                                                                                                                                            |     |                                  |     |                                                |   |           |   |                      |   |           |   |                    |   |           |   |           |   |           |   |           |    |            |    |            |    |                        |    |                      |    |                   |    |                         |    |                                                                  |    |                                    |    |                                              |    |                                                   |    |                                                        |    |                                     |    |         |    |            |
| 6   | Never been married                                               |                                                                                                                                                                                                                                                                                                              |                                                                                                                                                                                                                                                                                                                                                                                                                                                                                                                                                                                                                                                                                                                                                                                                                                                                                                                                                                                                                                                                                                                                                                                                                                                                                                            |     |                                  |     |                                                |   |           |   |                      |   |           |   |                    |   |           |   |           |   |           |   |           |    |            |    |            |    |                        |    |                      |    |                   |    |                         |    |                                                                  |    |                                    |    |                                              |    |                                                   |    |                                                        |    |                                     |    |         |    |            |
| 110 | [ <b>birthplace_location</b> ]                                   | Where were you born?<br><i>PX010201   phenx_birthplace</i>                                                                                                                                                                                                                                                   | text                                                                                                                                                                                                                                                                                                                                                                                                                                                                                                                                                                                                                                                                                                                                                                                                                                                                                                                                                                                                                                                                                                                                                                                                                                                                                                       |     |                                  |     |                                                |   |           |   |                      |   |           |   |                    |   |           |   |           |   |           |   |           |    |            |    |            |    |                        |    |                      |    |                   |    |                         |    |                                                                  |    |                                    |    |                                              |    |                                                   |    |                                                        |    |                                     |    |         |    |            |
| 111 | [ <b>current_educational_achievement</b> ]                       | Section Header: <i>Socio-Demographics</i><br>What is the highest grade or level of school you have completed or the highest degree you have received?<br>[HAND CARD DMQ1. READ HAND CARD CATEGORIES IF NECESSARY. ENTER HIGHEST LEVEL OF SCHOOL.]<br><i>PX011001   phenx_current_educational_achievement</i> | dropdown <table border="1"> <tr><td>0</td><td>NEVER ATTENDED/KINDERGARTEN ONLY</td></tr> <tr><td>1</td><td>1ST GRADE</td></tr> <tr><td>2</td><td>2ND GRADE</td></tr> <tr><td>3</td><td>3RD GRADE</td></tr> <tr><td>4</td><td>4TH GRADE</td></tr> <tr><td>5</td><td>5TH GRADE</td></tr> <tr><td>6</td><td>6TH GRADE</td></tr> <tr><td>7</td><td>7TH GRADE</td></tr> <tr><td>8</td><td>8TH GRADE</td></tr> <tr><td>9</td><td>9TH GRADE</td></tr> <tr><td>10</td><td>10TH GRADE</td></tr> <tr><td>11</td><td>11TH GRADE</td></tr> <tr><td>12</td><td>12TH GRADE, NO DIPLOMA</td></tr> <tr><td>13</td><td>HIGH SCHOOL GRADUATE</td></tr> <tr><td>14</td><td>GED OR EQUIVALENT</td></tr> <tr><td>15</td><td>SOME COLLEGE, NO DEGREE</td></tr> <tr><td>16</td><td>ASSOCIATE DEGREE: OCCUPATIONAL, TECHNICAL, OR VOCATIONAL PROGRAM</td></tr> <tr><td>17</td><td>ASSOCIATE DEGREE: ACADEMIC PROGRAM</td></tr> <tr><td>18</td><td>BACHELOR'S DEGREE (EXAMPLE: BA, AB, BS, BBA)</td></tr> <tr><td>19</td><td>MASTER'S DEGREE (EXAMPLE: MA, MS, MEng, MEd, MBA)</td></tr> <tr><td>20</td><td>PROFESSIONAL SCHOOL DEGREE (EXAMPLE: MD, DDS, DVM, JD)</td></tr> <tr><td>21</td><td>DOCTORAL DEGREE (EXAMPLE: PhD, EdD)</td></tr> <tr><td>77</td><td>REFUSED</td></tr> <tr><td>99</td><td>DON'T KNOW</td></tr> </table> | 0   | NEVER ATTENDED/KINDERGARTEN ONLY | 1   | 1ST GRADE                                      | 2 | 2ND GRADE | 3 | 3RD GRADE            | 4 | 4TH GRADE | 5 | 5TH GRADE          | 6 | 6TH GRADE | 7 | 7TH GRADE | 8 | 8TH GRADE | 9 | 9TH GRADE | 10 | 10TH GRADE | 11 | 11TH GRADE | 12 | 12TH GRADE, NO DIPLOMA | 13 | HIGH SCHOOL GRADUATE | 14 | GED OR EQUIVALENT | 15 | SOME COLLEGE, NO DEGREE | 16 | ASSOCIATE DEGREE: OCCUPATIONAL, TECHNICAL, OR VOCATIONAL PROGRAM | 17 | ASSOCIATE DEGREE: ACADEMIC PROGRAM | 18 | BACHELOR'S DEGREE (EXAMPLE: BA, AB, BS, BBA) | 19 | MASTER'S DEGREE (EXAMPLE: MA, MS, MEng, MEd, MBA) | 20 | PROFESSIONAL SCHOOL DEGREE (EXAMPLE: MD, DDS, DVM, JD) | 21 | DOCTORAL DEGREE (EXAMPLE: PhD, EdD) | 77 | REFUSED | 99 | DON'T KNOW |
| 0   | NEVER ATTENDED/KINDERGARTEN ONLY                                 |                                                                                                                                                                                                                                                                                                              |                                                                                                                                                                                                                                                                                                                                                                                                                                                                                                                                                                                                                                                                                                                                                                                                                                                                                                                                                                                                                                                                                                                                                                                                                                                                                                            |     |                                  |     |                                                |   |           |   |                      |   |           |   |                    |   |           |   |           |   |           |   |           |    |            |    |            |    |                        |    |                      |    |                   |    |                         |    |                                                                  |    |                                    |    |                                              |    |                                                   |    |                                                        |    |                                     |    |         |    |            |
| 1   | 1ST GRADE                                                        |                                                                                                                                                                                                                                                                                                              |                                                                                                                                                                                                                                                                                                                                                                                                                                                                                                                                                                                                                                                                                                                                                                                                                                                                                                                                                                                                                                                                                                                                                                                                                                                                                                            |     |                                  |     |                                                |   |           |   |                      |   |           |   |                    |   |           |   |           |   |           |   |           |    |            |    |            |    |                        |    |                      |    |                   |    |                         |    |                                                                  |    |                                    |    |                                              |    |                                                   |    |                                                        |    |                                     |    |         |    |            |
| 2   | 2ND GRADE                                                        |                                                                                                                                                                                                                                                                                                              |                                                                                                                                                                                                                                                                                                                                                                                                                                                                                                                                                                                                                                                                                                                                                                                                                                                                                                                                                                                                                                                                                                                                                                                                                                                                                                            |     |                                  |     |                                                |   |           |   |                      |   |           |   |                    |   |           |   |           |   |           |   |           |    |            |    |            |    |                        |    |                      |    |                   |    |                         |    |                                                                  |    |                                    |    |                                              |    |                                                   |    |                                                        |    |                                     |    |         |    |            |
| 3   | 3RD GRADE                                                        |                                                                                                                                                                                                                                                                                                              |                                                                                                                                                                                                                                                                                                                                                                                                                                                                                                                                                                                                                                                                                                                                                                                                                                                                                                                                                                                                                                                                                                                                                                                                                                                                                                            |     |                                  |     |                                                |   |           |   |                      |   |           |   |                    |   |           |   |           |   |           |   |           |    |            |    |            |    |                        |    |                      |    |                   |    |                         |    |                                                                  |    |                                    |    |                                              |    |                                                   |    |                                                        |    |                                     |    |         |    |            |
| 4   | 4TH GRADE                                                        |                                                                                                                                                                                                                                                                                                              |                                                                                                                                                                                                                                                                                                                                                                                                                                                                                                                                                                                                                                                                                                                                                                                                                                                                                                                                                                                                                                                                                                                                                                                                                                                                                                            |     |                                  |     |                                                |   |           |   |                      |   |           |   |                    |   |           |   |           |   |           |   |           |    |            |    |            |    |                        |    |                      |    |                   |    |                         |    |                                                                  |    |                                    |    |                                              |    |                                                   |    |                                                        |    |                                     |    |         |    |            |
| 5   | 5TH GRADE                                                        |                                                                                                                                                                                                                                                                                                              |                                                                                                                                                                                                                                                                                                                                                                                                                                                                                                                                                                                                                                                                                                                                                                                                                                                                                                                                                                                                                                                                                                                                                                                                                                                                                                            |     |                                  |     |                                                |   |           |   |                      |   |           |   |                    |   |           |   |           |   |           |   |           |    |            |    |            |    |                        |    |                      |    |                   |    |                         |    |                                                                  |    |                                    |    |                                              |    |                                                   |    |                                                        |    |                                     |    |         |    |            |
| 6   | 6TH GRADE                                                        |                                                                                                                                                                                                                                                                                                              |                                                                                                                                                                                                                                                                                                                                                                                                                                                                                                                                                                                                                                                                                                                                                                                                                                                                                                                                                                                                                                                                                                                                                                                                                                                                                                            |     |                                  |     |                                                |   |           |   |                      |   |           |   |                    |   |           |   |           |   |           |   |           |    |            |    |            |    |                        |    |                      |    |                   |    |                         |    |                                                                  |    |                                    |    |                                              |    |                                                   |    |                                                        |    |                                     |    |         |    |            |
| 7   | 7TH GRADE                                                        |                                                                                                                                                                                                                                                                                                              |                                                                                                                                                                                                                                                                                                                                                                                                                                                                                                                                                                                                                                                                                                                                                                                                                                                                                                                                                                                                                                                                                                                                                                                                                                                                                                            |     |                                  |     |                                                |   |           |   |                      |   |           |   |                    |   |           |   |           |   |           |   |           |    |            |    |            |    |                        |    |                      |    |                   |    |                         |    |                                                                  |    |                                    |    |                                              |    |                                                   |    |                                                        |    |                                     |    |         |    |            |
| 8   | 8TH GRADE                                                        |                                                                                                                                                                                                                                                                                                              |                                                                                                                                                                                                                                                                                                                                                                                                                                                                                                                                                                                                                                                                                                                                                                                                                                                                                                                                                                                                                                                                                                                                                                                                                                                                                                            |     |                                  |     |                                                |   |           |   |                      |   |           |   |                    |   |           |   |           |   |           |   |           |    |            |    |            |    |                        |    |                      |    |                   |    |                         |    |                                                                  |    |                                    |    |                                              |    |                                                   |    |                                                        |    |                                     |    |         |    |            |
| 9   | 9TH GRADE                                                        |                                                                                                                                                                                                                                                                                                              |                                                                                                                                                                                                                                                                                                                                                                                                                                                                                                                                                                                                                                                                                                                                                                                                                                                                                                                                                                                                                                                                                                                                                                                                                                                                                                            |     |                                  |     |                                                |   |           |   |                      |   |           |   |                    |   |           |   |           |   |           |   |           |    |            |    |            |    |                        |    |                      |    |                   |    |                         |    |                                                                  |    |                                    |    |                                              |    |                                                   |    |                                                        |    |                                     |    |         |    |            |
| 10  | 10TH GRADE                                                       |                                                                                                                                                                                                                                                                                                              |                                                                                                                                                                                                                                                                                                                                                                                                                                                                                                                                                                                                                                                                                                                                                                                                                                                                                                                                                                                                                                                                                                                                                                                                                                                                                                            |     |                                  |     |                                                |   |           |   |                      |   |           |   |                    |   |           |   |           |   |           |   |           |    |            |    |            |    |                        |    |                      |    |                   |    |                         |    |                                                                  |    |                                    |    |                                              |    |                                                   |    |                                                        |    |                                     |    |         |    |            |
| 11  | 11TH GRADE                                                       |                                                                                                                                                                                                                                                                                                              |                                                                                                                                                                                                                                                                                                                                                                                                                                                                                                                                                                                                                                                                                                                                                                                                                                                                                                                                                                                                                                                                                                                                                                                                                                                                                                            |     |                                  |     |                                                |   |           |   |                      |   |           |   |                    |   |           |   |           |   |           |   |           |    |            |    |            |    |                        |    |                      |    |                   |    |                         |    |                                                                  |    |                                    |    |                                              |    |                                                   |    |                                                        |    |                                     |    |         |    |            |
| 12  | 12TH GRADE, NO DIPLOMA                                           |                                                                                                                                                                                                                                                                                                              |                                                                                                                                                                                                                                                                                                                                                                                                                                                                                                                                                                                                                                                                                                                                                                                                                                                                                                                                                                                                                                                                                                                                                                                                                                                                                                            |     |                                  |     |                                                |   |           |   |                      |   |           |   |                    |   |           |   |           |   |           |   |           |    |            |    |            |    |                        |    |                      |    |                   |    |                         |    |                                                                  |    |                                    |    |                                              |    |                                                   |    |                                                        |    |                                     |    |         |    |            |
| 13  | HIGH SCHOOL GRADUATE                                             |                                                                                                                                                                                                                                                                                                              |                                                                                                                                                                                                                                                                                                                                                                                                                                                                                                                                                                                                                                                                                                                                                                                                                                                                                                                                                                                                                                                                                                                                                                                                                                                                                                            |     |                                  |     |                                                |   |           |   |                      |   |           |   |                    |   |           |   |           |   |           |   |           |    |            |    |            |    |                        |    |                      |    |                   |    |                         |    |                                                                  |    |                                    |    |                                              |    |                                                   |    |                                                        |    |                                     |    |         |    |            |
| 14  | GED OR EQUIVALENT                                                |                                                                                                                                                                                                                                                                                                              |                                                                                                                                                                                                                                                                                                                                                                                                                                                                                                                                                                                                                                                                                                                                                                                                                                                                                                                                                                                                                                                                                                                                                                                                                                                                                                            |     |                                  |     |                                                |   |           |   |                      |   |           |   |                    |   |           |   |           |   |           |   |           |    |            |    |            |    |                        |    |                      |    |                   |    |                         |    |                                                                  |    |                                    |    |                                              |    |                                                   |    |                                                        |    |                                     |    |         |    |            |
| 15  | SOME COLLEGE, NO DEGREE                                          |                                                                                                                                                                                                                                                                                                              |                                                                                                                                                                                                                                                                                                                                                                                                                                                                                                                                                                                                                                                                                                                                                                                                                                                                                                                                                                                                                                                                                                                                                                                                                                                                                                            |     |                                  |     |                                                |   |           |   |                      |   |           |   |                    |   |           |   |           |   |           |   |           |    |            |    |            |    |                        |    |                      |    |                   |    |                         |    |                                                                  |    |                                    |    |                                              |    |                                                   |    |                                                        |    |                                     |    |         |    |            |
| 16  | ASSOCIATE DEGREE: OCCUPATIONAL, TECHNICAL, OR VOCATIONAL PROGRAM |                                                                                                                                                                                                                                                                                                              |                                                                                                                                                                                                                                                                                                                                                                                                                                                                                                                                                                                                                                                                                                                                                                                                                                                                                                                                                                                                                                                                                                                                                                                                                                                                                                            |     |                                  |     |                                                |   |           |   |                      |   |           |   |                    |   |           |   |           |   |           |   |           |    |            |    |            |    |                        |    |                      |    |                   |    |                         |    |                                                                  |    |                                    |    |                                              |    |                                                   |    |                                                        |    |                                     |    |         |    |            |
| 17  | ASSOCIATE DEGREE: ACADEMIC PROGRAM                               |                                                                                                                                                                                                                                                                                                              |                                                                                                                                                                                                                                                                                                                                                                                                                                                                                                                                                                                                                                                                                                                                                                                                                                                                                                                                                                                                                                                                                                                                                                                                                                                                                                            |     |                                  |     |                                                |   |           |   |                      |   |           |   |                    |   |           |   |           |   |           |   |           |    |            |    |            |    |                        |    |                      |    |                   |    |                         |    |                                                                  |    |                                    |    |                                              |    |                                                   |    |                                                        |    |                                     |    |         |    |            |
| 18  | BACHELOR'S DEGREE (EXAMPLE: BA, AB, BS, BBA)                     |                                                                                                                                                                                                                                                                                                              |                                                                                                                                                                                                                                                                                                                                                                                                                                                                                                                                                                                                                                                                                                                                                                                                                                                                                                                                                                                                                                                                                                                                                                                                                                                                                                            |     |                                  |     |                                                |   |           |   |                      |   |           |   |                    |   |           |   |           |   |           |   |           |    |            |    |            |    |                        |    |                      |    |                   |    |                         |    |                                                                  |    |                                    |    |                                              |    |                                                   |    |                                                        |    |                                     |    |         |    |            |
| 19  | MASTER'S DEGREE (EXAMPLE: MA, MS, MEng, MEd, MBA)                |                                                                                                                                                                                                                                                                                                              |                                                                                                                                                                                                                                                                                                                                                                                                                                                                                                                                                                                                                                                                                                                                                                                                                                                                                                                                                                                                                                                                                                                                                                                                                                                                                                            |     |                                  |     |                                                |   |           |   |                      |   |           |   |                    |   |           |   |           |   |           |   |           |    |            |    |            |    |                        |    |                      |    |                   |    |                         |    |                                                                  |    |                                    |    |                                              |    |                                                   |    |                                                        |    |                                     |    |         |    |            |
| 20  | PROFESSIONAL SCHOOL DEGREE (EXAMPLE: MD, DDS, DVM, JD)           |                                                                                                                                                                                                                                                                                                              |                                                                                                                                                                                                                                                                                                                                                                                                                                                                                                                                                                                                                                                                                                                                                                                                                                                                                                                                                                                                                                                                                                                                                                                                                                                                                                            |     |                                  |     |                                                |   |           |   |                      |   |           |   |                    |   |           |   |           |   |           |   |           |    |            |    |            |    |                        |    |                      |    |                   |    |                         |    |                                                                  |    |                                    |    |                                              |    |                                                   |    |                                                        |    |                                     |    |         |    |            |
| 21  | DOCTORAL DEGREE (EXAMPLE: PhD, EdD)                              |                                                                                                                                                                                                                                                                                                              |                                                                                                                                                                                                                                                                                                                                                                                                                                                                                                                                                                                                                                                                                                                                                                                                                                                                                                                                                                                                                                                                                                                                                                                                                                                                                                            |     |                                  |     |                                                |   |           |   |                      |   |           |   |                    |   |           |   |           |   |           |   |           |    |            |    |            |    |                        |    |                      |    |                   |    |                         |    |                                                                  |    |                                    |    |                                              |    |                                                   |    |                                                        |    |                                     |    |         |    |            |
| 77  | REFUSED                                                          |                                                                                                                                                                                                                                                                                                              |                                                                                                                                                                                                                                                                                                                                                                                                                                                                                                                                                                                                                                                                                                                                                                                                                                                                                                                                                                                                                                                                                                                                                                                                                                                                                                            |     |                                  |     |                                                |   |           |   |                      |   |           |   |                    |   |           |   |           |   |           |   |           |    |            |    |            |    |                        |    |                      |    |                   |    |                         |    |                                                                  |    |                                    |    |                                              |    |                                                   |    |                                                        |    |                                     |    |         |    |            |
| 99  | DON'T KNOW                                                       |                                                                                                                                                                                                                                                                                                              |                                                                                                                                                                                                                                                                                                                                                                                                                                                                                                                                                                                                                                                                                                                                                                                                                                                                                                                                                                                                                                                                                                                                                                                                                                                                                                            |     |                                  |     |                                                |   |           |   |                      |   |           |   |                    |   |           |   |           |   |           |   |           |    |            |    |            |    |                        |    |                      |    |                   |    |                         |    |                                                                  |    |                                    |    |                                              |    |                                                   |    |                                                        |    |                                     |    |         |    |            |
| 112 | [ <b>income_currency</b> ]                                       | Please select the income currency for your country.                                                                                                                                                                                                                                                          | dropdown <table border="1"> <tr> <td>NGN</td> <td>Nigerian naira</td> </tr> <tr> <td>USD</td> <td>US Dollar</td> </tr> </table>                                                                                                                                                                                                                                                                                                                                                                                                                                                                                                                                                                                                                                                                                                                                                                                                                                                                                                                                                                                                                                                                                                                                                                            | NGN | Nigerian naira                   | USD | US Dollar                                      |   |           |   |                      |   |           |   |                    |   |           |   |           |   |           |   |           |    |            |    |            |    |                        |    |                      |    |                   |    |                         |    |                                                                  |    |                                    |    |                                              |    |                                                   |    |                                                        |    |                                     |    |         |    |            |
| NGN | Nigerian naira                                                   |                                                                                                                                                                                                                                                                                                              |                                                                                                                                                                                                                                                                                                                                                                                                                                                                                                                                                                                                                                                                                                                                                                                                                                                                                                                                                                                                                                                                                                                                                                                                                                                                                                            |     |                                  |     |                                                |   |           |   |                      |   |           |   |                    |   |           |   |           |   |           |   |           |    |            |    |            |    |                        |    |                      |    |                   |    |                         |    |                                                                  |    |                                    |    |                                              |    |                                                   |    |                                                        |    |                                     |    |         |    |            |
| USD | US Dollar                                                        |                                                                                                                                                                                                                                                                                                              |                                                                                                                                                                                                                                                                                                                                                                                                                                                                                                                                                                                                                                                                                                                                                                                                                                                                                                                                                                                                                                                                                                                                                                                                                                                                                                            |     |                                  |     |                                                |   |           |   |                      |   |           |   |                    |   |           |   |           |   |           |   |           |    |            |    |            |    |                        |    |                      |    |                   |    |                         |    |                                                                  |    |                                    |    |                                              |    |                                                   |    |                                                        |    |                                     |    |         |    |            |
| 113 | [ <b>an_fam_income_coded</b> ]                                   | What was your best estimate of the total income of all family members from all sources, before taxes, in last year?<br><i>PX011101   phenx_annual_family_income</i>                                                                                                                                          | text                                                                                                                                                                                                                                                                                                                                                                                                                                                                                                                                                                                                                                                                                                                                                                                                                                                                                                                                                                                                                                                                                                                                                                                                                                                                                                       |     |                                  |     |                                                |   |           |   |                      |   |           |   |                    |   |           |   |           |   |           |   |           |    |            |    |            |    |                        |    |                      |    |                   |    |                         |    |                                                                  |    |                                    |    |                                              |    |                                                   |    |                                                        |    |                                     |    |         |    |            |

|     |                                                                        |                                                                                                                                                                                                                                                                                                         |                                                                                                                                                                                                                                                                                                                                                                                                                                                                                                                                                                                                                                                                                                                                                                                                                                                                                                                                                                                                                  |   |                      |   |                                                               |   |                                                                        |   |                      |   |                                      |   |                                                                   |   |                                       |   |                                        |   |                                                                |    |                          |    |                                                   |    |                                      |    |         |    |                 |    |            |
|-----|------------------------------------------------------------------------|---------------------------------------------------------------------------------------------------------------------------------------------------------------------------------------------------------------------------------------------------------------------------------------------------------|------------------------------------------------------------------------------------------------------------------------------------------------------------------------------------------------------------------------------------------------------------------------------------------------------------------------------------------------------------------------------------------------------------------------------------------------------------------------------------------------------------------------------------------------------------------------------------------------------------------------------------------------------------------------------------------------------------------------------------------------------------------------------------------------------------------------------------------------------------------------------------------------------------------------------------------------------------------------------------------------------------------|---|----------------------|---|---------------------------------------------------------------|---|------------------------------------------------------------------------|---|----------------------|---|--------------------------------------|---|-------------------------------------------------------------------|---|---------------------------------------|---|----------------------------------------|---|----------------------------------------------------------------|----|--------------------------|----|---------------------------------------------------|----|--------------------------------------|----|---------|----|-----------------|----|------------|
| 114 | [ <a href="#">current_employment_status</a> ]                          | We would like to know about what you do --are you working now, looking for work, retired, keeping house, a student, or what?<br><i>PX011301   phenx_current_employment_status</i>                                                                                                                       | dropdown <table><tr><td>1</td><td>WORKING NOW</td></tr><tr><td>2</td><td>ONLY TEMPORARILY LAID OFF, SICK LEAVE OR MATERNITY LEAVE</td></tr><tr><td>3</td><td>LOOKING FOR WORK, UNEMPLOYED</td></tr><tr><td>4</td><td>RETIRED</td></tr><tr><td>5</td><td>DISABLED, PERMANENTLY OR TEMPORARILY</td></tr><tr><td>6</td><td>KEEPING HOUSE</td></tr><tr><td>7</td><td>STUDENT</td></tr><tr><td>8</td><td>OTHER (SPECIFY):</td></tr></table>                                                                                                                                                                                                                                                                                                                                                                                                                                                                                                                                                                           | 1 | WORKING NOW          | 2 | ONLY TEMPORARILY LAID OFF, SICK LEAVE OR MATERNITY LEAVE      | 3 | LOOKING FOR WORK, UNEMPLOYED                                           | 4 | RETIRED              | 5 | DISABLED, PERMANENTLY OR TEMPORARILY | 6 | KEEPING HOUSE                                                     | 7 | STUDENT                               | 8 | OTHER (SPECIFY):                       |   |                                                                |    |                          |    |                                                   |    |                                      |    |         |    |                 |    |            |
| 1   | WORKING NOW                                                            |                                                                                                                                                                                                                                                                                                         |                                                                                                                                                                                                                                                                                                                                                                                                                                                                                                                                                                                                                                                                                                                                                                                                                                                                                                                                                                                                                  |   |                      |   |                                                               |   |                                                                        |   |                      |   |                                      |   |                                                                   |   |                                       |   |                                        |   |                                                                |    |                          |    |                                                   |    |                                      |    |         |    |                 |    |            |
| 2   | ONLY TEMPORARILY LAID OFF, SICK LEAVE OR MATERNITY LEAVE               |                                                                                                                                                                                                                                                                                                         |                                                                                                                                                                                                                                                                                                                                                                                                                                                                                                                                                                                                                                                                                                                                                                                                                                                                                                                                                                                                                  |   |                      |   |                                                               |   |                                                                        |   |                      |   |                                      |   |                                                                   |   |                                       |   |                                        |   |                                                                |    |                          |    |                                                   |    |                                      |    |         |    |                 |    |            |
| 3   | LOOKING FOR WORK, UNEMPLOYED                                           |                                                                                                                                                                                                                                                                                                         |                                                                                                                                                                                                                                                                                                                                                                                                                                                                                                                                                                                                                                                                                                                                                                                                                                                                                                                                                                                                                  |   |                      |   |                                                               |   |                                                                        |   |                      |   |                                      |   |                                                                   |   |                                       |   |                                        |   |                                                                |    |                          |    |                                                   |    |                                      |    |         |    |                 |    |            |
| 4   | RETIRED                                                                |                                                                                                                                                                                                                                                                                                         |                                                                                                                                                                                                                                                                                                                                                                                                                                                                                                                                                                                                                                                                                                                                                                                                                                                                                                                                                                                                                  |   |                      |   |                                                               |   |                                                                        |   |                      |   |                                      |   |                                                                   |   |                                       |   |                                        |   |                                                                |    |                          |    |                                                   |    |                                      |    |         |    |                 |    |            |
| 5   | DISABLED, PERMANENTLY OR TEMPORARILY                                   |                                                                                                                                                                                                                                                                                                         |                                                                                                                                                                                                                                                                                                                                                                                                                                                                                                                                                                                                                                                                                                                                                                                                                                                                                                                                                                                                                  |   |                      |   |                                                               |   |                                                                        |   |                      |   |                                      |   |                                                                   |   |                                       |   |                                        |   |                                                                |    |                          |    |                                                   |    |                                      |    |         |    |                 |    |            |
| 6   | KEEPING HOUSE                                                          |                                                                                                                                                                                                                                                                                                         |                                                                                                                                                                                                                                                                                                                                                                                                                                                                                                                                                                                                                                                                                                                                                                                                                                                                                                                                                                                                                  |   |                      |   |                                                               |   |                                                                        |   |                      |   |                                      |   |                                                                   |   |                                       |   |                                        |   |                                                                |    |                          |    |                                                   |    |                                      |    |         |    |                 |    |            |
| 7   | STUDENT                                                                |                                                                                                                                                                                                                                                                                                         |                                                                                                                                                                                                                                                                                                                                                                                                                                                                                                                                                                                                                                                                                                                                                                                                                                                                                                                                                                                                                  |   |                      |   |                                                               |   |                                                                        |   |                      |   |                                      |   |                                                                   |   |                                       |   |                                        |   |                                                                |    |                          |    |                                                   |    |                                      |    |         |    |                 |    |            |
| 8   | OTHER (SPECIFY):                                                       |                                                                                                                                                                                                                                                                                                         |                                                                                                                                                                                                                                                                                                                                                                                                                                                                                                                                                                                                                                                                                                                                                                                                                                                                                                                                                                                                                  |   |                      |   |                                                               |   |                                                                        |   |                      |   |                                      |   |                                                                   |   |                                       |   |                                        |   |                                                                |    |                          |    |                                                   |    |                                      |    |         |    |                 |    |            |
| 115 | [ <a href="#">cur_employ_stat_specify</a> ]                            | current employment status, Other - specify<br><i>PX011301   phenx_current_employment_status</i>                                                                                                                                                                                                         | text                                                                                                                                                                                                                                                                                                                                                                                                                                                                                                                                                                                                                                                                                                                                                                                                                                                                                                                                                                                                             |   |                      |   |                                                               |   |                                                                        |   |                      |   |                                      |   |                                                                   |   |                                       |   |                                        |   |                                                                |    |                          |    |                                                   |    |                                      |    |         |    |                 |    |            |
| 116 | [ <a href="#">description_female_210201</a> ]                          | This question is about the woman who functions as a mother in the respondent's household; she could be the biological mother, stepmother, foster mother, or adoptive mother or, perhaps, a grandmother or aunt. If there is no such woman, the question is skipped.<br>R=respondent<br><i>PX0210201</i> | descriptive                                                                                                                                                                                                                                                                                                                                                                                                                                                                                                                                                                                                                                                                                                                                                                                                                                                                                                                                                                                                      |   |                      |   |                                                               |   |                                                                        |   |                      |   |                                      |   |                                                                   |   |                                       |   |                                        |   |                                                                |    |                          |    |                                                   |    |                                      |    |         |    |                 |    |            |
| 117 | [ <a href="#">answers_1_210201</a> ]                                   | How far in school did she go?<br><i>PX0210201</i>                                                                                                                                                                                                                                                       | radio <table><tr><td>1</td><td>eighth grade or less</td></tr><tr><td>2</td><td>more than eighth grade, but did not graduate from high school</td></tr><tr><td>3</td><td>went to a business, trade, or vocational school instead of high school</td></tr><tr><td>4</td><td>high school graduate</td></tr><tr><td>5</td><td>completed a GED</td></tr><tr><td>6</td><td>went to a business, trade, or vocational school after high school</td></tr><tr><td>7</td><td>went to college, but did not graduate</td></tr><tr><td>8</td><td>graduated from a college or university</td></tr><tr><td>9</td><td>professional training beyond a four-year college or university</td></tr><tr><td>10</td><td>she never went to school</td></tr><tr><td>11</td><td>she went to school, but R doesn't know what level</td></tr><tr><td>12</td><td>R doesn't know if she went to school</td></tr><tr><td>13</td><td>refused</td></tr><tr><td>14</td><td>legitimate skip</td></tr><tr><td>15</td><td>don't know</td></tr></table> | 1 | eighth grade or less | 2 | more than eighth grade, but did not graduate from high school | 3 | went to a business, trade, or vocational school instead of high school | 4 | high school graduate | 5 | completed a GED                      | 6 | went to a business, trade, or vocational school after high school | 7 | went to college, but did not graduate | 8 | graduated from a college or university | 9 | professional training beyond a four-year college or university | 10 | she never went to school | 11 | she went to school, but R doesn't know what level | 12 | R doesn't know if she went to school | 13 | refused | 14 | legitimate skip | 15 | don't know |
| 1   | eighth grade or less                                                   |                                                                                                                                                                                                                                                                                                         |                                                                                                                                                                                                                                                                                                                                                                                                                                                                                                                                                                                                                                                                                                                                                                                                                                                                                                                                                                                                                  |   |                      |   |                                                               |   |                                                                        |   |                      |   |                                      |   |                                                                   |   |                                       |   |                                        |   |                                                                |    |                          |    |                                                   |    |                                      |    |         |    |                 |    |            |
| 2   | more than eighth grade, but did not graduate from high school          |                                                                                                                                                                                                                                                                                                         |                                                                                                                                                                                                                                                                                                                                                                                                                                                                                                                                                                                                                                                                                                                                                                                                                                                                                                                                                                                                                  |   |                      |   |                                                               |   |                                                                        |   |                      |   |                                      |   |                                                                   |   |                                       |   |                                        |   |                                                                |    |                          |    |                                                   |    |                                      |    |         |    |                 |    |            |
| 3   | went to a business, trade, or vocational school instead of high school |                                                                                                                                                                                                                                                                                                         |                                                                                                                                                                                                                                                                                                                                                                                                                                                                                                                                                                                                                                                                                                                                                                                                                                                                                                                                                                                                                  |   |                      |   |                                                               |   |                                                                        |   |                      |   |                                      |   |                                                                   |   |                                       |   |                                        |   |                                                                |    |                          |    |                                                   |    |                                      |    |         |    |                 |    |            |
| 4   | high school graduate                                                   |                                                                                                                                                                                                                                                                                                         |                                                                                                                                                                                                                                                                                                                                                                                                                                                                                                                                                                                                                                                                                                                                                                                                                                                                                                                                                                                                                  |   |                      |   |                                                               |   |                                                                        |   |                      |   |                                      |   |                                                                   |   |                                       |   |                                        |   |                                                                |    |                          |    |                                                   |    |                                      |    |         |    |                 |    |            |
| 5   | completed a GED                                                        |                                                                                                                                                                                                                                                                                                         |                                                                                                                                                                                                                                                                                                                                                                                                                                                                                                                                                                                                                                                                                                                                                                                                                                                                                                                                                                                                                  |   |                      |   |                                                               |   |                                                                        |   |                      |   |                                      |   |                                                                   |   |                                       |   |                                        |   |                                                                |    |                          |    |                                                   |    |                                      |    |         |    |                 |    |            |
| 6   | went to a business, trade, or vocational school after high school      |                                                                                                                                                                                                                                                                                                         |                                                                                                                                                                                                                                                                                                                                                                                                                                                                                                                                                                                                                                                                                                                                                                                                                                                                                                                                                                                                                  |   |                      |   |                                                               |   |                                                                        |   |                      |   |                                      |   |                                                                   |   |                                       |   |                                        |   |                                                                |    |                          |    |                                                   |    |                                      |    |         |    |                 |    |            |
| 7   | went to college, but did not graduate                                  |                                                                                                                                                                                                                                                                                                         |                                                                                                                                                                                                                                                                                                                                                                                                                                                                                                                                                                                                                                                                                                                                                                                                                                                                                                                                                                                                                  |   |                      |   |                                                               |   |                                                                        |   |                      |   |                                      |   |                                                                   |   |                                       |   |                                        |   |                                                                |    |                          |    |                                                   |    |                                      |    |         |    |                 |    |            |
| 8   | graduated from a college or university                                 |                                                                                                                                                                                                                                                                                                         |                                                                                                                                                                                                                                                                                                                                                                                                                                                                                                                                                                                                                                                                                                                                                                                                                                                                                                                                                                                                                  |   |                      |   |                                                               |   |                                                                        |   |                      |   |                                      |   |                                                                   |   |                                       |   |                                        |   |                                                                |    |                          |    |                                                   |    |                                      |    |         |    |                 |    |            |
| 9   | professional training beyond a four-year college or university         |                                                                                                                                                                                                                                                                                                         |                                                                                                                                                                                                                                                                                                                                                                                                                                                                                                                                                                                                                                                                                                                                                                                                                                                                                                                                                                                                                  |   |                      |   |                                                               |   |                                                                        |   |                      |   |                                      |   |                                                                   |   |                                       |   |                                        |   |                                                                |    |                          |    |                                                   |    |                                      |    |         |    |                 |    |            |
| 10  | she never went to school                                               |                                                                                                                                                                                                                                                                                                         |                                                                                                                                                                                                                                                                                                                                                                                                                                                                                                                                                                                                                                                                                                                                                                                                                                                                                                                                                                                                                  |   |                      |   |                                                               |   |                                                                        |   |                      |   |                                      |   |                                                                   |   |                                       |   |                                        |   |                                                                |    |                          |    |                                                   |    |                                      |    |         |    |                 |    |            |
| 11  | she went to school, but R doesn't know what level                      |                                                                                                                                                                                                                                                                                                         |                                                                                                                                                                                                                                                                                                                                                                                                                                                                                                                                                                                                                                                                                                                                                                                                                                                                                                                                                                                                                  |   |                      |   |                                                               |   |                                                                        |   |                      |   |                                      |   |                                                                   |   |                                       |   |                                        |   |                                                                |    |                          |    |                                                   |    |                                      |    |         |    |                 |    |            |
| 12  | R doesn't know if she went to school                                   |                                                                                                                                                                                                                                                                                                         |                                                                                                                                                                                                                                                                                                                                                                                                                                                                                                                                                                                                                                                                                                                                                                                                                                                                                                                                                                                                                  |   |                      |   |                                                               |   |                                                                        |   |                      |   |                                      |   |                                                                   |   |                                       |   |                                        |   |                                                                |    |                          |    |                                                   |    |                                      |    |         |    |                 |    |            |
| 13  | refused                                                                |                                                                                                                                                                                                                                                                                                         |                                                                                                                                                                                                                                                                                                                                                                                                                                                                                                                                                                                                                                                                                                                                                                                                                                                                                                                                                                                                                  |   |                      |   |                                                               |   |                                                                        |   |                      |   |                                      |   |                                                                   |   |                                       |   |                                        |   |                                                                |    |                          |    |                                                   |    |                                      |    |         |    |                 |    |            |
| 14  | legitimate skip                                                        |                                                                                                                                                                                                                                                                                                         |                                                                                                                                                                                                                                                                                                                                                                                                                                                                                                                                                                                                                                                                                                                                                                                                                                                                                                                                                                                                                  |   |                      |   |                                                               |   |                                                                        |   |                      |   |                                      |   |                                                                   |   |                                       |   |                                        |   |                                                                |    |                          |    |                                                   |    |                                      |    |         |    |                 |    |            |
| 15  | don't know                                                             |                                                                                                                                                                                                                                                                                                         |                                                                                                                                                                                                                                                                                                                                                                                                                                                                                                                                                                                                                                                                                                                                                                                                                                                                                                                                                                                                                  |   |                      |   |                                                               |   |                                                                        |   |                      |   |                                      |   |                                                                   |   |                                       |   |                                        |   |                                                                |    |                          |    |                                                   |    |                                      |    |         |    |                 |    |            |
| 118 | [ <a href="#">description_male_210201</a> ]                            | This question is about the man who functions as a father in the respondent's household. If there is no such man, the question is skipped.<br><i>PX0210201</i>                                                                                                                                           | descriptive                                                                                                                                                                                                                                                                                                                                                                                                                                                                                                                                                                                                                                                                                                                                                                                                                                                                                                                                                                                                      |   |                      |   |                                                               |   |                                                                        |   |                      |   |                                      |   |                                                                   |   |                                       |   |                                        |   |                                                                |    |                          |    |                                                   |    |                                      |    |         |    |                 |    |            |

|                  |                                                                                                              |                                                                  |                                                                                                                                                                                                                                                                                                                                                                                                                                                                                                                                                                                                                                                                                                                                                                                                                                                                                                                                                                                                                |  |                |                      |                  |                                                               |                  |                                                                        |                  |                      |                  |                 |                  |                                                                   |                  |                                       |                  |                                        |   |                                                                |    |                         |    |                                                  |    |                                      |    |         |    |                 |    |            |
|------------------|--------------------------------------------------------------------------------------------------------------|------------------------------------------------------------------|----------------------------------------------------------------------------------------------------------------------------------------------------------------------------------------------------------------------------------------------------------------------------------------------------------------------------------------------------------------------------------------------------------------------------------------------------------------------------------------------------------------------------------------------------------------------------------------------------------------------------------------------------------------------------------------------------------------------------------------------------------------------------------------------------------------------------------------------------------------------------------------------------------------------------------------------------------------------------------------------------------------|--|----------------|----------------------|------------------|---------------------------------------------------------------|------------------|------------------------------------------------------------------------|------------------|----------------------|------------------|-----------------|------------------|-------------------------------------------------------------------|------------------|---------------------------------------|------------------|----------------------------------------|---|----------------------------------------------------------------|----|-------------------------|----|--------------------------------------------------|----|--------------------------------------|----|---------|----|-----------------|----|------------|
| 119              | [ answers_2_210201 ]                                                                                         | How far in school did he go?<br><i>PX0210201</i>                 | radio <table><tr><td>1</td><td>eighth grade or less</td></tr><tr><td>2</td><td>more than eighth grade, but did not graduate from high school</td></tr><tr><td>3</td><td>went to a business, trade, or vocational school instead of high school</td></tr><tr><td>4</td><td>high school graduate</td></tr><tr><td>5</td><td>completed a GED</td></tr><tr><td>6</td><td>went to a business, trade, or vocational school after high school</td></tr><tr><td>7</td><td>went to college, but did not graduate</td></tr><tr><td>8</td><td>graduated from a college or university</td></tr><tr><td>9</td><td>professional training beyond a four-year college or university</td></tr><tr><td>10</td><td>he never went to school</td></tr><tr><td>11</td><td>he went to school, but R doesn't know what level</td></tr><tr><td>12</td><td>R doesn't know if she went to school</td></tr><tr><td>13</td><td>refused</td></tr><tr><td>14</td><td>legitimate skip</td></tr><tr><td>15</td><td>don't know</td></tr></table> |  | 1              | eighth grade or less | 2                | more than eighth grade, but did not graduate from high school | 3                | went to a business, trade, or vocational school instead of high school | 4                | high school graduate | 5                | completed a GED | 6                | went to a business, trade, or vocational school after high school | 7                | went to college, but did not graduate | 8                | graduated from a college or university | 9 | professional training beyond a four-year college or university | 10 | he never went to school | 11 | he went to school, but R doesn't know what level | 12 | R doesn't know if she went to school | 13 | refused | 14 | legitimate skip | 15 | don't know |
| 1                | eighth grade or less                                                                                         |                                                                  |                                                                                                                                                                                                                                                                                                                                                                                                                                                                                                                                                                                                                                                                                                                                                                                                                                                                                                                                                                                                                |  |                |                      |                  |                                                               |                  |                                                                        |                  |                      |                  |                 |                  |                                                                   |                  |                                       |                  |                                        |   |                                                                |    |                         |    |                                                  |    |                                      |    |         |    |                 |    |            |
| 2                | more than eighth grade, but did not graduate from high school                                                |                                                                  |                                                                                                                                                                                                                                                                                                                                                                                                                                                                                                                                                                                                                                                                                                                                                                                                                                                                                                                                                                                                                |  |                |                      |                  |                                                               |                  |                                                                        |                  |                      |                  |                 |                  |                                                                   |                  |                                       |                  |                                        |   |                                                                |    |                         |    |                                                  |    |                                      |    |         |    |                 |    |            |
| 3                | went to a business, trade, or vocational school instead of high school                                       |                                                                  |                                                                                                                                                                                                                                                                                                                                                                                                                                                                                                                                                                                                                                                                                                                                                                                                                                                                                                                                                                                                                |  |                |                      |                  |                                                               |                  |                                                                        |                  |                      |                  |                 |                  |                                                                   |                  |                                       |                  |                                        |   |                                                                |    |                         |    |                                                  |    |                                      |    |         |    |                 |    |            |
| 4                | high school graduate                                                                                         |                                                                  |                                                                                                                                                                                                                                                                                                                                                                                                                                                                                                                                                                                                                                                                                                                                                                                                                                                                                                                                                                                                                |  |                |                      |                  |                                                               |                  |                                                                        |                  |                      |                  |                 |                  |                                                                   |                  |                                       |                  |                                        |   |                                                                |    |                         |    |                                                  |    |                                      |    |         |    |                 |    |            |
| 5                | completed a GED                                                                                              |                                                                  |                                                                                                                                                                                                                                                                                                                                                                                                                                                                                                                                                                                                                                                                                                                                                                                                                                                                                                                                                                                                                |  |                |                      |                  |                                                               |                  |                                                                        |                  |                      |                  |                 |                  |                                                                   |                  |                                       |                  |                                        |   |                                                                |    |                         |    |                                                  |    |                                      |    |         |    |                 |    |            |
| 6                | went to a business, trade, or vocational school after high school                                            |                                                                  |                                                                                                                                                                                                                                                                                                                                                                                                                                                                                                                                                                                                                                                                                                                                                                                                                                                                                                                                                                                                                |  |                |                      |                  |                                                               |                  |                                                                        |                  |                      |                  |                 |                  |                                                                   |                  |                                       |                  |                                        |   |                                                                |    |                         |    |                                                  |    |                                      |    |         |    |                 |    |            |
| 7                | went to college, but did not graduate                                                                        |                                                                  |                                                                                                                                                                                                                                                                                                                                                                                                                                                                                                                                                                                                                                                                                                                                                                                                                                                                                                                                                                                                                |  |                |                      |                  |                                                               |                  |                                                                        |                  |                      |                  |                 |                  |                                                                   |                  |                                       |                  |                                        |   |                                                                |    |                         |    |                                                  |    |                                      |    |         |    |                 |    |            |
| 8                | graduated from a college or university                                                                       |                                                                  |                                                                                                                                                                                                                                                                                                                                                                                                                                                                                                                                                                                                                                                                                                                                                                                                                                                                                                                                                                                                                |  |                |                      |                  |                                                               |                  |                                                                        |                  |                      |                  |                 |                  |                                                                   |                  |                                       |                  |                                        |   |                                                                |    |                         |    |                                                  |    |                                      |    |         |    |                 |    |            |
| 9                | professional training beyond a four-year college or university                                               |                                                                  |                                                                                                                                                                                                                                                                                                                                                                                                                                                                                                                                                                                                                                                                                                                                                                                                                                                                                                                                                                                                                |  |                |                      |                  |                                                               |                  |                                                                        |                  |                      |                  |                 |                  |                                                                   |                  |                                       |                  |                                        |   |                                                                |    |                         |    |                                                  |    |                                      |    |         |    |                 |    |            |
| 10               | he never went to school                                                                                      |                                                                  |                                                                                                                                                                                                                                                                                                                                                                                                                                                                                                                                                                                                                                                                                                                                                                                                                                                                                                                                                                                                                |  |                |                      |                  |                                                               |                  |                                                                        |                  |                      |                  |                 |                  |                                                                   |                  |                                       |                  |                                        |   |                                                                |    |                         |    |                                                  |    |                                      |    |         |    |                 |    |            |
| 11               | he went to school, but R doesn't know what level                                                             |                                                                  |                                                                                                                                                                                                                                                                                                                                                                                                                                                                                                                                                                                                                                                                                                                                                                                                                                                                                                                                                                                                                |  |                |                      |                  |                                                               |                  |                                                                        |                  |                      |                  |                 |                  |                                                                   |                  |                                       |                  |                                        |   |                                                                |    |                         |    |                                                  |    |                                      |    |         |    |                 |    |            |
| 12               | R doesn't know if she went to school                                                                         |                                                                  |                                                                                                                                                                                                                                                                                                                                                                                                                                                                                                                                                                                                                                                                                                                                                                                                                                                                                                                                                                                                                |  |                |                      |                  |                                                               |                  |                                                                        |                  |                      |                  |                 |                  |                                                                   |                  |                                       |                  |                                        |   |                                                                |    |                         |    |                                                  |    |                                      |    |         |    |                 |    |            |
| 13               | refused                                                                                                      |                                                                  |                                                                                                                                                                                                                                                                                                                                                                                                                                                                                                                                                                                                                                                                                                                                                                                                                                                                                                                                                                                                                |  |                |                      |                  |                                                               |                  |                                                                        |                  |                      |                  |                 |                  |                                                                   |                  |                                       |                  |                                        |   |                                                                |    |                         |    |                                                  |    |                                      |    |         |    |                 |    |            |
| 14               | legitimate skip                                                                                              |                                                                  |                                                                                                                                                                                                                                                                                                                                                                                                                                                                                                                                                                                                                                                                                                                                                                                                                                                                                                                                                                                                                |  |                |                      |                  |                                                               |                  |                                                                        |                  |                      |                  |                 |                  |                                                                   |                  |                                       |                  |                                        |   |                                                                |    |                         |    |                                                  |    |                                      |    |         |    |                 |    |            |
| 15               | don't know                                                                                                   |                                                                  |                                                                                                                                                                                                                                                                                                                                                                                                                                                                                                                                                                                                                                                                                                                                                                                                                                                                                                                                                                                                                |  |                |                      |                  |                                                               |                  |                                                                        |                  |                      |                  |                 |                  |                                                                   |                  |                                       |                  |                                        |   |                                                                |    |                         |    |                                                  |    |                                      |    |         |    |                 |    |            |
| 120              | [ health_insurance_coverage_type ]<br><br>Show the field ONLY if:<br>[health_insurance_coverage_other] = '1' | What type of health insurance do you have?<br><i>PX011502</i>    | text                                                                                                                                                                                                                                                                                                                                                                                                                                                                                                                                                                                                                                                                                                                                                                                                                                                                                                                                                                                                           |  |                |                      |                  |                                                               |                  |                                                                        |                  |                      |                  |                 |                  |                                                                   |                  |                                       |                  |                                        |   |                                                                |    |                         |    |                                                  |    |                                      |    |         |    |                 |    |            |
| 121              | [ scd_martialstatus_primarycaregiver ]                                                                       | Marital status of primary caregiver<br><i>PX0840101</i>          | radio <table><tr><td>UNDEFINED_CODE</td><td>Married</td></tr><tr><td>UNDEFINED_CODE_1</td><td>Widowed</td></tr><tr><td>UNDEFINED_CODE_2</td><td>Separated</td></tr><tr><td>UNDEFINED_CODE_3</td><td>Divorced</td></tr><tr><td>UNDEFINED_CODE_4</td><td>Never married</td></tr><tr><td>UNDEFINED_CODE_5</td><td>Living with partner</td></tr><tr><td>UNDEFINED_CODE_6</td><td>Refused to answer</td></tr><tr><td>UNDEFINED_CODE_7</td><td>Unknown</td></tr></table>                                                                                                                                                                                                                                                                                                                                                                                                                                                                                                                                             |  | UNDEFINED_CODE | Married              | UNDEFINED_CODE_1 | Widowed                                                       | UNDEFINED_CODE_2 | Separated                                                              | UNDEFINED_CODE_3 | Divorced             | UNDEFINED_CODE_4 | Never married   | UNDEFINED_CODE_5 | Living with partner                                               | UNDEFINED_CODE_6 | Refused to answer                     | UNDEFINED_CODE_7 | Unknown                                |   |                                                                |    |                         |    |                                                  |    |                                      |    |         |    |                 |    |            |
| UNDEFINED_CODE   | Married                                                                                                      |                                                                  |                                                                                                                                                                                                                                                                                                                                                                                                                                                                                                                                                                                                                                                                                                                                                                                                                                                                                                                                                                                                                |  |                |                      |                  |                                                               |                  |                                                                        |                  |                      |                  |                 |                  |                                                                   |                  |                                       |                  |                                        |   |                                                                |    |                         |    |                                                  |    |                                      |    |         |    |                 |    |            |
| UNDEFINED_CODE_1 | Widowed                                                                                                      |                                                                  |                                                                                                                                                                                                                                                                                                                                                                                                                                                                                                                                                                                                                                                                                                                                                                                                                                                                                                                                                                                                                |  |                |                      |                  |                                                               |                  |                                                                        |                  |                      |                  |                 |                  |                                                                   |                  |                                       |                  |                                        |   |                                                                |    |                         |    |                                                  |    |                                      |    |         |    |                 |    |            |
| UNDEFINED_CODE_2 | Separated                                                                                                    |                                                                  |                                                                                                                                                                                                                                                                                                                                                                                                                                                                                                                                                                                                                                                                                                                                                                                                                                                                                                                                                                                                                |  |                |                      |                  |                                                               |                  |                                                                        |                  |                      |                  |                 |                  |                                                                   |                  |                                       |                  |                                        |   |                                                                |    |                         |    |                                                  |    |                                      |    |         |    |                 |    |            |
| UNDEFINED_CODE_3 | Divorced                                                                                                     |                                                                  |                                                                                                                                                                                                                                                                                                                                                                                                                                                                                                                                                                                                                                                                                                                                                                                                                                                                                                                                                                                                                |  |                |                      |                  |                                                               |                  |                                                                        |                  |                      |                  |                 |                  |                                                                   |                  |                                       |                  |                                        |   |                                                                |    |                         |    |                                                  |    |                                      |    |         |    |                 |    |            |
| UNDEFINED_CODE_4 | Never married                                                                                                |                                                                  |                                                                                                                                                                                                                                                                                                                                                                                                                                                                                                                                                                                                                                                                                                                                                                                                                                                                                                                                                                                                                |  |                |                      |                  |                                                               |                  |                                                                        |                  |                      |                  |                 |                  |                                                                   |                  |                                       |                  |                                        |   |                                                                |    |                         |    |                                                  |    |                                      |    |         |    |                 |    |            |
| UNDEFINED_CODE_5 | Living with partner                                                                                          |                                                                  |                                                                                                                                                                                                                                                                                                                                                                                                                                                                                                                                                                                                                                                                                                                                                                                                                                                                                                                                                                                                                |  |                |                      |                  |                                                               |                  |                                                                        |                  |                      |                  |                 |                  |                                                                   |                  |                                       |                  |                                        |   |                                                                |    |                         |    |                                                  |    |                                      |    |         |    |                 |    |            |
| UNDEFINED_CODE_6 | Refused to answer                                                                                            |                                                                  |                                                                                                                                                                                                                                                                                                                                                                                                                                                                                                                                                                                                                                                                                                                                                                                                                                                                                                                                                                                                                |  |                |                      |                  |                                                               |                  |                                                                        |                  |                      |                  |                 |                  |                                                                   |                  |                                       |                  |                                        |   |                                                                |    |                         |    |                                                  |    |                                      |    |         |    |                 |    |            |
| UNDEFINED_CODE_7 | Unknown                                                                                                      |                                                                  |                                                                                                                                                                                                                                                                                                                                                                                                                                                                                                                                                                                                                                                                                                                                                                                                                                                                                                                                                                                                                |  |                |                      |                  |                                                               |                  |                                                                        |                  |                      |                  |                 |                  |                                                                   |                  |                                       |                  |                                        |   |                                                                |    |                         |    |                                                  |    |                                      |    |         |    |                 |    |            |
| 122              | [ scd_martialstatus_primarycaregiver_relationshipto_patient ]                                                | Relationship of primary caregiver to patient<br><i>PX0840101</i> | radio <table><tr><td>1</td><td>Mother</td></tr><tr><td>2</td><td>Father</td></tr><tr><td>3</td><td>Niece or nephew</td></tr><tr><td>4</td><td>Aunt or uncle</td></tr><tr><td>5</td><td>Cousin</td></tr><tr><td>6</td><td>Grandparent</td></tr><tr><td>7</td><td>Great grandparent</td></tr><tr><td>8</td><td>Foster parent</td></tr><tr><td>9</td><td>Other; explain below</td></tr></table>                                                                                                                                                                                                                                                                                                                                                                                                                                                                                                                                                                                                                   |  | 1              | Mother               | 2                | Father                                                        | 3                | Niece or nephew                                                        | 4                | Aunt or uncle        | 5                | Cousin          | 6                | Grandparent                                                       | 7                | Great grandparent                     | 8                | Foster parent                          | 9 | Other; explain below                                           |    |                         |    |                                                  |    |                                      |    |         |    |                 |    |            |
| 1                | Mother                                                                                                       |                                                                  |                                                                                                                                                                                                                                                                                                                                                                                                                                                                                                                                                                                                                                                                                                                                                                                                                                                                                                                                                                                                                |  |                |                      |                  |                                                               |                  |                                                                        |                  |                      |                  |                 |                  |                                                                   |                  |                                       |                  |                                        |   |                                                                |    |                         |    |                                                  |    |                                      |    |         |    |                 |    |            |
| 2                | Father                                                                                                       |                                                                  |                                                                                                                                                                                                                                                                                                                                                                                                                                                                                                                                                                                                                                                                                                                                                                                                                                                                                                                                                                                                                |  |                |                      |                  |                                                               |                  |                                                                        |                  |                      |                  |                 |                  |                                                                   |                  |                                       |                  |                                        |   |                                                                |    |                         |    |                                                  |    |                                      |    |         |    |                 |    |            |
| 3                | Niece or nephew                                                                                              |                                                                  |                                                                                                                                                                                                                                                                                                                                                                                                                                                                                                                                                                                                                                                                                                                                                                                                                                                                                                                                                                                                                |  |                |                      |                  |                                                               |                  |                                                                        |                  |                      |                  |                 |                  |                                                                   |                  |                                       |                  |                                        |   |                                                                |    |                         |    |                                                  |    |                                      |    |         |    |                 |    |            |
| 4                | Aunt or uncle                                                                                                |                                                                  |                                                                                                                                                                                                                                                                                                                                                                                                                                                                                                                                                                                                                                                                                                                                                                                                                                                                                                                                                                                                                |  |                |                      |                  |                                                               |                  |                                                                        |                  |                      |                  |                 |                  |                                                                   |                  |                                       |                  |                                        |   |                                                                |    |                         |    |                                                  |    |                                      |    |         |    |                 |    |            |
| 5                | Cousin                                                                                                       |                                                                  |                                                                                                                                                                                                                                                                                                                                                                                                                                                                                                                                                                                                                                                                                                                                                                                                                                                                                                                                                                                                                |  |                |                      |                  |                                                               |                  |                                                                        |                  |                      |                  |                 |                  |                                                                   |                  |                                       |                  |                                        |   |                                                                |    |                         |    |                                                  |    |                                      |    |         |    |                 |    |            |
| 6                | Grandparent                                                                                                  |                                                                  |                                                                                                                                                                                                                                                                                                                                                                                                                                                                                                                                                                                                                                                                                                                                                                                                                                                                                                                                                                                                                |  |                |                      |                  |                                                               |                  |                                                                        |                  |                      |                  |                 |                  |                                                                   |                  |                                       |                  |                                        |   |                                                                |    |                         |    |                                                  |    |                                      |    |         |    |                 |    |            |
| 7                | Great grandparent                                                                                            |                                                                  |                                                                                                                                                                                                                                                                                                                                                                                                                                                                                                                                                                                                                                                                                                                                                                                                                                                                                                                                                                                                                |  |                |                      |                  |                                                               |                  |                                                                        |                  |                      |                  |                 |                  |                                                                   |                  |                                       |                  |                                        |   |                                                                |    |                         |    |                                                  |    |                                      |    |         |    |                 |    |            |
| 8                | Foster parent                                                                                                |                                                                  |                                                                                                                                                                                                                                                                                                                                                                                                                                                                                                                                                                                                                                                                                                                                                                                                                                                                                                                                                                                                                |  |                |                      |                  |                                                               |                  |                                                                        |                  |                      |                  |                 |                  |                                                                   |                  |                                       |                  |                                        |   |                                                                |    |                         |    |                                                  |    |                                      |    |         |    |                 |    |            |
| 9                | Other; explain below                                                                                         |                                                                  |                                                                                                                                                                                                                                                                                                                                                                                                                                                                                                                                                                                                                                                                                                                                                                                                                                                                                                                                                                                                                |  |                |                      |                  |                                                               |                  |                                                                        |                  |                      |                  |                 |                  |                                                                   |                  |                                       |                  |                                        |   |                                                                |    |                         |    |                                                  |    |                                      |    |         |    |                 |    |            |
| 123              | [ scd_martialstatus_primarycaregiver_relationshipto_patientother ]                                           | Relationship of primary caregiver to patient<br><i>PX0840101</i> | text <table><tr><td>Other</td><td>Other</td></tr></table>                                                                                                                                                                                                                                                                                                                                                                                                                                                                                                                                                                                                                                                                                                                                                                                                                                                                                                                                                      |  | Other          | Other                |                  |                                                               |                  |                                                                        |                  |                      |                  |                 |                  |                                                                   |                  |                                       |                  |                                        |   |                                                                |    |                         |    |                                                  |    |                                      |    |         |    |                 |    |            |
| Other            | Other                                                                                                        |                                                                  |                                                                                                                                                                                                                                                                                                                                                                                                                                                                                                                                                                                                                                                                                                                                                                                                                                                                                                                                                                                                                |  |                |                      |                  |                                                               |                  |                                                                        |                  |                      |                  |                 |                  |                                                                   |                  |                                       |                  |                                        |   |                                                                |    |                         |    |                                                  |    |                                      |    |         |    |                 |    |            |

|                                                          |                        |                                  |                                                                                                                                                                                                                        |                                                                                                                                                                                                             |    |                 |     |                        |   |          |   |            |
|----------------------------------------------------------|------------------------|----------------------------------|------------------------------------------------------------------------------------------------------------------------------------------------------------------------------------------------------------------------|-------------------------------------------------------------------------------------------------------------------------------------------------------------------------------------------------------------|----|-----------------|-----|------------------------|---|----------|---|------------|
|                                                          | 124                    | [ demographics_complete ]        | Section Header: <i>Form Status</i><br>Complete?                                                                                                                                                                        | dropdown <table border="1"> <tr><td>0</td><td>Incomplete</td></tr> <tr><td>1</td><td>Unverified</td></tr> <tr><td>2</td><td>Complete</td></tr> </table>                                                     | 0  | Incomplete      | 1   | Unverified             | 2 | Complete |   |            |
| 0                                                        | Incomplete             |                                  |                                                                                                                                                                                                                        |                                                                                                                                                                                                             |    |                 |     |                        |   |          |   |            |
| 1                                                        | Unverified             |                                  |                                                                                                                                                                                                                        |                                                                                                                                                                                                             |    |                 |     |                        |   |          |   |            |
| 2                                                        | Complete               |                                  |                                                                                                                                                                                                                        |                                                                                                                                                                                                             |    |                 |     |                        |   |          |   |            |
| <b>Instrument: Anthropometrics (anthropometrics)</b>     |                        |                                  |                                                                                                                                                                                                                        |                                                                                                                                                                                                             |    |                 |     |                        |   |          |   |            |
|                                                          | 125                    | [ standing_ht_units ]            | Standing Height Units<br><i>PX020703   phenx_standing_height</i>                                                                                                                                                       | dropdown <table border="1"> <tr><td>ft</td><td>Feet</td></tr> <tr><td>in</td><td>Inches</td></tr> <tr><td>m</td><td>Meters</td></tr> </table><br>Custom alignment: RH                                       | ft | Feet            | in  | Inches                 | m | Meters   |   |            |
| ft                                                       | Feet                   |                                  |                                                                                                                                                                                                                        |                                                                                                                                                                                                             |    |                 |     |                        |   |          |   |            |
| in                                                       | Inches                 |                                  |                                                                                                                                                                                                                        |                                                                                                                                                                                                             |    |                 |     |                        |   |          |   |            |
| m                                                        | Meters                 |                                  |                                                                                                                                                                                                                        |                                                                                                                                                                                                             |    |                 |     |                        |   |          |   |            |
|                                                          | 126                    | [ standing_ht ]                  | Standing Height<br><i>PX020703   phenx_standing_height</i>                                                                                                                                                             | text (number, Min: 0)                                                                                                                                                                                       |    |                 |     |                        |   |          |   |            |
|                                                          | 127                    | [ self_reported_ht_coded ]       | How tall {are you/is [participant]?} without shoes?<br>ENTER HEIGHT IN FEET AND INCHES OR METERS AND CENTIMETERS<br><i>PX020704   phenx_selfreported_height</i>                                                        | radio <table border="1"> <tr><td>1</td><td>FEET AND INCHES</td></tr> <tr><td>2</td><td>METERS AND CENTIMETERS</td></tr> <tr><td>3</td><td>REFUSED</td></tr> <tr><td>4</td><td>DON'T KNOW</td></tr> </table> | 1  | FEET AND INCHES | 2   | METERS AND CENTIMETERS | 3 | REFUSED  | 4 | DON'T KNOW |
| 1                                                        | FEET AND INCHES        |                                  |                                                                                                                                                                                                                        |                                                                                                                                                                                                             |    |                 |     |                        |   |          |   |            |
| 2                                                        | METERS AND CENTIMETERS |                                  |                                                                                                                                                                                                                        |                                                                                                                                                                                                             |    |                 |     |                        |   |          |   |            |
| 3                                                        | REFUSED                |                                  |                                                                                                                                                                                                                        |                                                                                                                                                                                                             |    |                 |     |                        |   |          |   |            |
| 4                                                        | DON'T KNOW             |                                  |                                                                                                                                                                                                                        |                                                                                                                                                                                                             |    |                 |     |                        |   |          |   |            |
|                                                          | 128                    | [ self_reported_ht_proxy_name ]  | Proxy Name<br><i>If applicable     PX020704   phenx_selfreported_height</i>                                                                                                                                            | text                                                                                                                                                                                                        |    |                 |     |                        |   |          |   |            |
|                                                          | 129                    | [ measured_wt_units ]            | Record Current Weight in Pounds or Kilograms.<br><i>PX021501   phenx_measured_weight</i>                                                                                                                               | dropdown <table border="1"> <tr><td>kg</td><td>Kilograms</td></tr> <tr><td>lbs</td><td>Pounds</td></tr> </table><br>Custom alignment: RH                                                                    | kg | Kilograms       | lbs | Pounds                 |   |          |   |            |
| kg                                                       | Kilograms              |                                  |                                                                                                                                                                                                                        |                                                                                                                                                                                                             |    |                 |     |                        |   |          |   |            |
| lbs                                                      | Pounds                 |                                  |                                                                                                                                                                                                                        |                                                                                                                                                                                                             |    |                 |     |                        |   |          |   |            |
|                                                          | 130                    | [ measured_wt ]                  | Measured Weight<br><i>PX021501   phenx_measured_weight</i>                                                                                                                                                             | text (number, Min: 0)                                                                                                                                                                                       |    |                 |     |                        |   |          |   |            |
|                                                          | 131                    | [ self_reported_wt ]             | How much {do you/does the participant} weigh without clothes or shoes?<br>[If {you are/she is} currently pregnant, how much did {you/she} weigh before your pregnancy?]<br><i>PX021502   phenx_selfreported_weight</i> | text (number, Min: 0)                                                                                                                                                                                       |    |                 |     |                        |   |          |   |            |
|                                                          | 132                    | [ sp02 ]                         | Peripheral oxygen saturation (SpO2)                                                                                                                                                                                    | text                                                                                                                                                                                                        |    |                 |     |                        |   |          |   |            |
|                                                          | 133                    | [ mid_upper_arm_circumference ]  | Mid-Upper Arm Circumference [MUAC] (Pediatrics)                                                                                                                                                                        | text                                                                                                                                                                                                        |    |                 |     |                        |   |          |   |            |
|                                                          | 134                    | [ anthropometrics_complete ]     | Section Header: <i>Form Status</i><br>Complete?                                                                                                                                                                        | dropdown <table border="1"> <tr><td>0</td><td>Incomplete</td></tr> <tr><td>1</td><td>Unverified</td></tr> <tr><td>2</td><td>Complete</td></tr> </table>                                                     | 0  | Incomplete      | 1   | Unverified             | 2 | Complete |   |            |
| 0                                                        | Incomplete             |                                  |                                                                                                                                                                                                                        |                                                                                                                                                                                                             |    |                 |     |                        |   |          |   |            |
| 1                                                        | Unverified             |                                  |                                                                                                                                                                                                                        |                                                                                                                                                                                                             |    |                 |     |                        |   |          |   |            |
| 2                                                        | Complete               |                                  |                                                                                                                                                                                                                        |                                                                                                                                                                                                             |    |                 |     |                        |   |          |   |            |
| <b>Instrument: Patient Follow Up (patient_follow_up)</b> |                        |                                  |                                                                                                                                                                                                                        |                                                                                                                                                                                                             |    |                 |     |                        |   |          |   |            |
|                                                          | 135                    | [ visit_date ]                   | Visit Date                                                                                                                                                                                                             | text (date_dmy)                                                                                                                                                                                             |    |                 |     |                        |   |          |   |            |
|                                                          | 136                    | [ last_visit ]                   | When was your last visit to the hospital or Sickle Cell Clinic                                                                                                                                                         | text (date_dmy)                                                                                                                                                                                             |    |                 |     |                        |   |          |   |            |
|                                                          | 137                    | [ how_many_crises_have_you_had ] | How many crises have you had since your last visit?                                                                                                                                                                    | text (number)                                                                                                                                                                                               |    |                 |     |                        |   |          |   |            |
|                                                          | 138                    | [ when_was_your_last_crisis ]    | When was your last crisis?                                                                                                                                                                                             | text (date_dmy)                                                                                                                                                                                             |    |                 |     |                        |   |          |   |            |
|                                                          | 139                    | [ weight ]                       | Weight (kg)                                                                                                                                                                                                            | text                                                                                                                                                                                                        |    |                 |     |                        |   |          |   |            |
|                                                          | 140                    | [ height_length ]                | Height/Length (cm)                                                                                                                                                                                                     | text                                                                                                                                                                                                        |    |                 |     |                        |   |          |   |            |
|                                                          | 141                    | [ systol_blood_press ]           | Systolic blood pressure (mmHg)                                                                                                                                                                                         | text (integer)                                                                                                                                                                                              |    |                 |     |                        |   |          |   |            |
|                                                          | 142                    | [ diastol_blood_press ]          | Diastolic blood pressure (mmHg)                                                                                                                                                                                        | text (integer)                                                                                                                                                                                              |    |                 |     |                        |   |          |   |            |
|                                                          | 143                    | [ temp ]                         | Temperature (Celcius)                                                                                                                                                                                                  | text                                                                                                                                                                                                        |    |                 |     |                        |   |          |   |            |
|                                                          | 144                    | [ spo2 ]                         | Peripheral oxygen saturation (SpO2)                                                                                                                                                                                    | text                                                                                                                                                                                                        |    |                 |     |                        |   |          |   |            |
|                                                          | 145                    | [ muac ]                         | Mid-Upper Arm Circumference [MUAC]                                                                                                                                                                                     | text                                                                                                                                                                                                        |    |                 |     |                        |   |          |   |            |

|   |                           |                                                                              |                                   |                                                                                                                                            |   |     |   |    |   |                           |
|---|---------------------------|------------------------------------------------------------------------------|-----------------------------------|--------------------------------------------------------------------------------------------------------------------------------------------|---|-----|---|----|---|---------------------------|
|   | 146                       | [ hb_quantitation ]                                                          | Hb Quantitation (if available)    | yesno<br><table><tr><td>1</td><td>Yes</td></tr><tr><td>0</td><td>No</td></tr></table>                                                      | 1 | Yes | 0 | No |   |                           |
| 1 | Yes                       |                                                                              |                                   |                                                                                                                                            |   |     |   |    |   |                           |
| 0 | No                        |                                                                              |                                   |                                                                                                                                            |   |     |   |    |   |                           |
|   | 147                       | [ hbss ]                                                                     | HbSS %                            | text (number)                                                                                                                              |   |     |   |    |   |                           |
|   | 148                       | [ hbSc ]                                                                     | HbSC %                            | text (number)                                                                                                                              |   |     |   |    |   |                           |
|   | 149                       | [ hbF ]                                                                      | HbF %                             | text                                                                                                                                       |   |     |   |    |   |                           |
|   | 150                       | [ hba2 ]                                                                     | HbA2 %                            | text                                                                                                                                       |   |     |   |    |   |                           |
|   | 151                       | [ hb_others ]                                                                | Hb (others)                       | text                                                                                                                                       |   |     |   |    |   |                           |
|   | 152                       | [ hb_g_dl ]                                                                  | Hb (g/dl)                         | text (number)                                                                                                                              |   |     |   |    |   |                           |
|   | 153                       | [ fbc_done ]                                                                 | FBC Done                          | yesno<br><table><tr><td>1</td><td>Yes</td></tr><tr><td>0</td><td>No</td></tr></table>                                                      | 1 | Yes | 0 | No |   |                           |
| 1 | Yes                       |                                                                              |                                   |                                                                                                                                            |   |     |   |    |   |                           |
| 0 | No                        |                                                                              |                                   |                                                                                                                                            |   |     |   |    |   |                           |
|   | 154                       | [ date_of_fbc_result ]                                                       | Date of FBC Result                | text (date_dmy)                                                                                                                            |   |     |   |    |   |                           |
|   | 155                       | [ pcv ]                                                                      | PCV                               | text                                                                                                                                       |   |     |   |    |   |                           |
|   | 156                       | [ wbc ]                                                                      | WBC                               | text                                                                                                                                       |   |     |   |    |   |                           |
|   | 157                       | [ rbc ]                                                                      | RBC                               | text                                                                                                                                       |   |     |   |    |   |                           |
|   | 158                       | [ mch ]                                                                      | MCH                               | text                                                                                                                                       |   |     |   |    |   |                           |
|   | 159                       | [ reticulocyte_count ]                                                       | Reticulocyte Count                | text                                                                                                                                       |   |     |   |    |   |                           |
|   | 160                       | [ mcv ]                                                                      | MCV                               | text                                                                                                                                       |   |     |   |    |   |                           |
|   | 161                       | [ mchc ]                                                                     | MCHC                              | text                                                                                                                                       |   |     |   |    |   |                           |
|   | 162                       | [ red_blood_cell_distribution_width ]                                        | Red Blood Cell Distribution Width | text                                                                                                                                       |   |     |   |    |   |                           |
|   | 163                       | [ urea ]                                                                     | Urea                              | text                                                                                                                                       |   |     |   |    |   |                           |
|   | 164                       | [ creatinine ]                                                               | Creatinine                        | text                                                                                                                                       |   |     |   |    |   |                           |
|   | 165                       | [ direct_bilirubin ]                                                         | Direct Bilirubin                  | text                                                                                                                                       |   |     |   |    |   |                           |
|   | 166                       | [ total_bilirubin ]                                                          | Total Bilirubin                   | text                                                                                                                                       |   |     |   |    |   |                           |
|   | 167                       | [ boold_transfusion ]                                                        | Blood Transfusion                 | radio<br><table><tr><td>1</td><td>Yes</td></tr><tr><td>2</td><td>No</td></tr><tr><td>4</td><td>Not asked / Not collected</td></tr></table> | 1 | Yes | 2 | No | 4 | Not asked / Not collected |
| 1 | Yes                       |                                                                              |                                   |                                                                                                                                            |   |     |   |    |   |                           |
| 2 | No                        |                                                                              |                                   |                                                                                                                                            |   |     |   |    |   |                           |
| 4 | Not asked / Not collected |                                                                              |                                   |                                                                                                                                            |   |     |   |    |   |                           |
|   | 168                       | [ units_transfused ]<br>Show the field ONLY if:<br>[boold_transfusion] = '1' | Units of blood transfused         | text                                                                                                                                       |   |     |   |    |   |                           |
|   | 169                       | [ date_transfusion ]<br>Show the field ONLY if:<br>[boold_transfusion] = '1' | Date of transfusion               | text (date_ymd)                                                                                                                            |   |     |   |    |   |                           |
|   | 170                       | [ penicillin_prophylaxis ]                                                   | Penicillin Prophylaxis            | radio<br><table><tr><td>1</td><td>Yes</td></tr><tr><td>2</td><td>No</td></tr><tr><td>4</td><td>Not asked / Not collected</td></tr></table> | 1 | Yes | 2 | No | 4 | Not asked / Not collected |
| 1 | Yes                       |                                                                              |                                   |                                                                                                                                            |   |     |   |    |   |                           |
| 2 | No                        |                                                                              |                                   |                                                                                                                                            |   |     |   |    |   |                           |
| 4 | Not asked / Not collected |                                                                              |                                   |                                                                                                                                            |   |     |   |    |   |                           |
|   | 171                       | [ folicacid_prophylaxis ]                                                    | Folic Acid Prophylaxis            | radio<br><table><tr><td>1</td><td>Yes</td></tr><tr><td>2</td><td>No</td></tr><tr><td>4</td><td>Not asked / Not collected</td></tr></table> | 1 | Yes | 2 | No | 4 | Not asked / Not collected |
| 1 | Yes                       |                                                                              |                                   |                                                                                                                                            |   |     |   |    |   |                           |
| 2 | No                        |                                                                              |                                   |                                                                                                                                            |   |     |   |    |   |                           |
| 4 | Not asked / Not collected |                                                                              |                                   |                                                                                                                                            |   |     |   |    |   |                           |
|   | 172                       | [ antimal_prophylaxis ]                                                      | Anti Malaria Prophylaxis          | radio<br><table><tr><td>1</td><td>Yes</td></tr><tr><td>2</td><td>No</td></tr><tr><td>4</td><td>Not asked / Not collected</td></tr></table> | 1 | Yes | 2 | No | 4 | Not asked / Not collected |
| 1 | Yes                       |                                                                              |                                   |                                                                                                                                            |   |     |   |    |   |                           |
| 2 | No                        |                                                                              |                                   |                                                                                                                                            |   |     |   |    |   |                           |
| 4 | Not asked / Not collected |                                                                              |                                   |                                                                                                                                            |   |     |   |    |   |                           |

|    |                           |                                      |                                                                                               |                                                                                                                                                                                                                                                                                                                                                           |   |     |   |    |   |                           |   |   |   |   |   |   |   |   |   |   |   |   |   |   |    |    |
|----|---------------------------|--------------------------------------|-----------------------------------------------------------------------------------------------|-----------------------------------------------------------------------------------------------------------------------------------------------------------------------------------------------------------------------------------------------------------------------------------------------------------------------------------------------------------|---|-----|---|----|---|---------------------------|---|---|---|---|---|---|---|---|---|---|---|---|---|---|----|----|
|    | 173                       | [ hydroxyurea_use ]                  | Using Hydroxyurea                                                                             | radio <table><tr><td>1</td><td>Yes</td></tr><tr><td>2</td><td>No</td></tr><tr><td>4</td><td>Not asked / Not collected</td></tr></table>                                                                                                                                                                                                                   | 1 | Yes | 2 | No | 4 | Not asked / Not collected |   |   |   |   |   |   |   |   |   |   |   |   |   |   |    |    |
| 1  | Yes                       |                                      |                                                                                               |                                                                                                                                                                                                                                                                                                                                                           |   |     |   |    |   |                           |   |   |   |   |   |   |   |   |   |   |   |   |   |   |    |    |
| 2  | No                        |                                      |                                                                                               |                                                                                                                                                                                                                                                                                                                                                           |   |     |   |    |   |                           |   |   |   |   |   |   |   |   |   |   |   |   |   |   |    |    |
| 4  | Not asked / Not collected |                                      |                                                                                               |                                                                                                                                                                                                                                                                                                                                                           |   |     |   |    |   |                           |   |   |   |   |   |   |   |   |   |   |   |   |   |   |    |    |
|    | 174                       | [ other_medications_taken ]          | Other Medications taken                                                                       | text                                                                                                                                                                                                                                                                                                                                                      |   |     |   |    |   |                           |   |   |   |   |   |   |   |   |   |   |   |   |   |   |    |    |
|    | 175                       | [ pain_intensity_score ]             | Pain Intensity Score                                                                          | dropdown <table><tr><td>0</td><td>0</td></tr><tr><td>1</td><td>1</td></tr><tr><td>2</td><td>2</td></tr><tr><td>3</td><td>3</td></tr><tr><td>4</td><td>4</td></tr><tr><td>5</td><td>5</td></tr><tr><td>6</td><td>6</td></tr><tr><td>7</td><td>7</td></tr><tr><td>8</td><td>8</td></tr><tr><td>9</td><td>9</td></tr><tr><td>10</td><td>10</td></tr></table> | 0 | 0   | 1 | 1  | 2 | 2                         | 3 | 3 | 4 | 4 | 5 | 5 | 6 | 6 | 7 | 7 | 8 | 8 | 9 | 9 | 10 | 10 |
| 0  | 0                         |                                      |                                                                                               |                                                                                                                                                                                                                                                                                                                                                           |   |     |   |    |   |                           |   |   |   |   |   |   |   |   |   |   |   |   |   |   |    |    |
| 1  | 1                         |                                      |                                                                                               |                                                                                                                                                                                                                                                                                                                                                           |   |     |   |    |   |                           |   |   |   |   |   |   |   |   |   |   |   |   |   |   |    |    |
| 2  | 2                         |                                      |                                                                                               |                                                                                                                                                                                                                                                                                                                                                           |   |     |   |    |   |                           |   |   |   |   |   |   |   |   |   |   |   |   |   |   |    |    |
| 3  | 3                         |                                      |                                                                                               |                                                                                                                                                                                                                                                                                                                                                           |   |     |   |    |   |                           |   |   |   |   |   |   |   |   |   |   |   |   |   |   |    |    |
| 4  | 4                         |                                      |                                                                                               |                                                                                                                                                                                                                                                                                                                                                           |   |     |   |    |   |                           |   |   |   |   |   |   |   |   |   |   |   |   |   |   |    |    |
| 5  | 5                         |                                      |                                                                                               |                                                                                                                                                                                                                                                                                                                                                           |   |     |   |    |   |                           |   |   |   |   |   |   |   |   |   |   |   |   |   |   |    |    |
| 6  | 6                         |                                      |                                                                                               |                                                                                                                                                                                                                                                                                                                                                           |   |     |   |    |   |                           |   |   |   |   |   |   |   |   |   |   |   |   |   |   |    |    |
| 7  | 7                         |                                      |                                                                                               |                                                                                                                                                                                                                                                                                                                                                           |   |     |   |    |   |                           |   |   |   |   |   |   |   |   |   |   |   |   |   |   |    |    |
| 8  | 8                         |                                      |                                                                                               |                                                                                                                                                                                                                                                                                                                                                           |   |     |   |    |   |                           |   |   |   |   |   |   |   |   |   |   |   |   |   |   |    |    |
| 9  | 9                         |                                      |                                                                                               |                                                                                                                                                                                                                                                                                                                                                           |   |     |   |    |   |                           |   |   |   |   |   |   |   |   |   |   |   |   |   |   |    |    |
| 10 | 10                        |                                      |                                                                                               |                                                                                                                                                                                                                                                                                                                                                           |   |     |   |    |   |                           |   |   |   |   |   |   |   |   |   |   |   |   |   |   |    |    |
|    | 176                       | [ dactylitisfollowup ]               | Section Header: <i>Have you had any of the following after your last visit?</i><br>Dactylitis | yesno <table><tr><td>1</td><td>Yes</td></tr><tr><td>0</td><td>No</td></tr></table>                                                                                                                                                                                                                                                                        | 1 | Yes | 0 | No |   |                           |   |   |   |   |   |   |   |   |   |   |   |   |   |   |    |    |
| 1  | Yes                       |                                      |                                                                                               |                                                                                                                                                                                                                                                                                                                                                           |   |     |   |    |   |                           |   |   |   |   |   |   |   |   |   |   |   |   |   |   |    |    |
| 0  | No                        |                                      |                                                                                               |                                                                                                                                                                                                                                                                                                                                                           |   |     |   |    |   |                           |   |   |   |   |   |   |   |   |   |   |   |   |   |   |    |    |
|    | 177                       | [ bone_pain_followup ]               | Bone Pain                                                                                     | yesno <table><tr><td>1</td><td>Yes</td></tr><tr><td>0</td><td>No</td></tr></table>                                                                                                                                                                                                                                                                        | 1 | Yes | 0 | No |   |                           |   |   |   |   |   |   |   |   |   |   |   |   |   |   |    |    |
| 1  | Yes                       |                                      |                                                                                               |                                                                                                                                                                                                                                                                                                                                                           |   |     |   |    |   |                           |   |   |   |   |   |   |   |   |   |   |   |   |   |   |    |    |
| 0  | No                        |                                      |                                                                                               |                                                                                                                                                                                                                                                                                                                                                           |   |     |   |    |   |                           |   |   |   |   |   |   |   |   |   |   |   |   |   |   |    |    |
|    | 178                       | [ hip_pain_followup ]                | Hip pain                                                                                      | yesno <table><tr><td>1</td><td>Yes</td></tr><tr><td>0</td><td>No</td></tr></table>                                                                                                                                                                                                                                                                        | 1 | Yes | 0 | No |   |                           |   |   |   |   |   |   |   |   |   |   |   |   |   |   |    |    |
| 1  | Yes                       |                                      |                                                                                               |                                                                                                                                                                                                                                                                                                                                                           |   |     |   |    |   |                           |   |   |   |   |   |   |   |   |   |   |   |   |   |   |    |    |
| 0  | No                        |                                      |                                                                                               |                                                                                                                                                                                                                                                                                                                                                           |   |     |   |    |   |                           |   |   |   |   |   |   |   |   |   |   |   |   |   |   |    |    |
|    | 179                       | [ chest_pain_followup ]              | Chest Pain                                                                                    | yesno <table><tr><td>1</td><td>Yes</td></tr><tr><td>0</td><td>No</td></tr></table>                                                                                                                                                                                                                                                                        | 1 | Yes | 0 | No |   |                           |   |   |   |   |   |   |   |   |   |   |   |   |   |   |    |    |
| 1  | Yes                       |                                      |                                                                                               |                                                                                                                                                                                                                                                                                                                                                           |   |     |   |    |   |                           |   |   |   |   |   |   |   |   |   |   |   |   |   |   |    |    |
| 0  | No                        |                                      |                                                                                               |                                                                                                                                                                                                                                                                                                                                                           |   |     |   |    |   |                           |   |   |   |   |   |   |   |   |   |   |   |   |   |   |    |    |
|    | 180                       | [ difficulty_in_walking_followup ]   | Difficulty in walking                                                                         | yesno <table><tr><td>1</td><td>Yes</td></tr><tr><td>0</td><td>No</td></tr></table>                                                                                                                                                                                                                                                                        | 1 | Yes | 0 | No |   |                           |   |   |   |   |   |   |   |   |   |   |   |   |   |   |    |    |
| 1  | Yes                       |                                      |                                                                                               |                                                                                                                                                                                                                                                                                                                                                           |   |     |   |    |   |                           |   |   |   |   |   |   |   |   |   |   |   |   |   |   |    |    |
| 0  | No                        |                                      |                                                                                               |                                                                                                                                                                                                                                                                                                                                                           |   |     |   |    |   |                           |   |   |   |   |   |   |   |   |   |   |   |   |   |   |    |    |
|    | 181                       | [ difficulty_in_breathing_followup ] | Difficulty in Breathing                                                                       | yesno <table><tr><td>1</td><td>Yes</td></tr><tr><td>0</td><td>No</td></tr></table>                                                                                                                                                                                                                                                                        | 1 | Yes | 0 | No |   |                           |   |   |   |   |   |   |   |   |   |   |   |   |   |   |    |    |
| 1  | Yes                       |                                      |                                                                                               |                                                                                                                                                                                                                                                                                                                                                           |   |     |   |    |   |                           |   |   |   |   |   |   |   |   |   |   |   |   |   |   |    |    |
| 0  | No                        |                                      |                                                                                               |                                                                                                                                                                                                                                                                                                                                                           |   |     |   |    |   |                           |   |   |   |   |   |   |   |   |   |   |   |   |   |   |    |    |
|    | 182                       | [ hospitalised_in_the_last_30_days ] | Hospitalised in the last 30 days                                                              | yesno <table><tr><td>1</td><td>Yes</td></tr><tr><td>0</td><td>No</td></tr></table>                                                                                                                                                                                                                                                                        | 1 | Yes | 0 | No |   |                           |   |   |   |   |   |   |   |   |   |   |   |   |   |   |    |    |
| 1  | Yes                       |                                      |                                                                                               |                                                                                                                                                                                                                                                                                                                                                           |   |     |   |    |   |                           |   |   |   |   |   |   |   |   |   |   |   |   |   |   |    |    |
| 0  | No                        |                                      |                                                                                               |                                                                                                                                                                                                                                                                                                                                                           |   |     |   |    |   |                           |   |   |   |   |   |   |   |   |   |   |   |   |   |   |    |    |
|    | 183                       | [ malaria_followup ]                 | Malaria                                                                                       | yesno <table><tr><td>1</td><td>Yes</td></tr><tr><td>0</td><td>No</td></tr></table>                                                                                                                                                                                                                                                                        | 1 | Yes | 0 | No |   |                           |   |   |   |   |   |   |   |   |   |   |   |   |   |   |    |    |
| 1  | Yes                       |                                      |                                                                                               |                                                                                                                                                                                                                                                                                                                                                           |   |     |   |    |   |                           |   |   |   |   |   |   |   |   |   |   |   |   |   |   |    |    |
| 0  | No                        |                                      |                                                                                               |                                                                                                                                                                                                                                                                                                                                                           |   |     |   |    |   |                           |   |   |   |   |   |   |   |   |   |   |   |   |   |   |    |    |
|    | 184                       | [ fever_followup ]                   | Fever                                                                                         | yesno <table><tr><td>1</td><td>Yes</td></tr><tr><td>0</td><td>No</td></tr></table>                                                                                                                                                                                                                                                                        | 1 | Yes | 0 | No |   |                           |   |   |   |   |   |   |   |   |   |   |   |   |   |   |    |    |
| 1  | Yes                       |                                      |                                                                                               |                                                                                                                                                                                                                                                                                                                                                           |   |     |   |    |   |                           |   |   |   |   |   |   |   |   |   |   |   |   |   |   |    |    |
| 0  | No                        |                                      |                                                                                               |                                                                                                                                                                                                                                                                                                                                                           |   |     |   |    |   |                           |   |   |   |   |   |   |   |   |   |   |   |   |   |   |    |    |
|    | 185                       | [ anaemia_followup ]                 | Anaemia                                                                                       | yesno <table><tr><td>1</td><td>Yes</td></tr><tr><td>0</td><td>No</td></tr></table>                                                                                                                                                                                                                                                                        | 1 | Yes | 0 | No |   |                           |   |   |   |   |   |   |   |   |   |   |   |   |   |   |    |    |
| 1  | Yes                       |                                      |                                                                                               |                                                                                                                                                                                                                                                                                                                                                           |   |     |   |    |   |                           |   |   |   |   |   |   |   |   |   |   |   |   |   |   |    |    |
| 0  | No                        |                                      |                                                                                               |                                                                                                                                                                                                                                                                                                                                                           |   |     |   |    |   |                           |   |   |   |   |   |   |   |   |   |   |   |   |   |   |    |    |



|  |     |                              |                                       |                        |
|--|-----|------------------------------|---------------------------------------|------------------------|
|  | 186 | [leg_ulcer_followup]         | Leg ulcer                             | yesno<br>1 Yes<br>0 No |
|  | 187 | [acute_chest_syndrome_f]     | Acute chest syndrome                  | yesno<br>1 Yes<br>0 No |
|  | 188 | [osteonecrosis_followup]     | Osteonecrosis                         | yesno<br>1 Yes<br>0 No |
|  | 189 | [stroke_followup]            | Stroke                                | yesno<br>1 Yes<br>0 No |
|  | 190 | [renal_complication_explain] | Renal complication explained by DR    | yesno<br>1 Yes<br>0 No |
|  | 191 | [protein_in_your_urine]      | Protein in your urine                 | yesno<br>1 Yes<br>0 No |
|  | 192 | [swollen_feet]               | Swollen feet                          | yesno<br>1 Yes<br>0 No |
|  | 193 | [morning_facial_swelling]    | Morning facial swelling               | yesno<br>1 Yes<br>0 No |
|  | 194 | [dizziness_followup]         | Dizziness                             | yesno<br>1 Yes<br>0 No |
|  | 195 | [headache_followup]          | Headache                              | yesno<br>1 Yes<br>0 No |
|  | 196 | [swelling_followup]          | Swelling                              | yesno<br>1 Yes<br>0 No |
|  | 197 | [where]                      | Where?                                | text                   |
|  | 198 | [priapism_followup]          | Priapism                              | yesno<br>1 Yes<br>0 No |
|  | 199 | [jaundice_followup]          | Jaundice                              | yesno<br>1 Yes<br>0 No |
|  | 200 | [exertional_dyspnea_exertio] | Exertional dyspnea Exertional dyspnea | yesno<br>1 Yes<br>0 No |
|  | 201 | [abnormal_gait_followup]     | Abnormal GAIT                         | yesno<br>1 Yes<br>0 No |
|  | 202 | [other_pain_site_followup]   | Other Pain Site                       | text                   |

|   |                       |                                |                                                 |                                                                                                                                                                                                                                                                                                                                                                                                                                                                                                                                                                       |   |                       |          |            |                       |          |   |                       |           |   |                       |          |   |                       |          |   |                       |         |   |                       |        |   |                       |          |
|---|-----------------------|--------------------------------|-------------------------------------------------|-----------------------------------------------------------------------------------------------------------------------------------------------------------------------------------------------------------------------------------------------------------------------------------------------------------------------------------------------------------------------------------------------------------------------------------------------------------------------------------------------------------------------------------------------------------------------|---|-----------------------|----------|------------|-----------------------|----------|---|-----------------------|-----------|---|-----------------------|----------|---|-----------------------|----------|---|-----------------------|---------|---|-----------------------|--------|---|-----------------------|----------|
|   | 203                   | [ abnormal_appetite_followup ] | Abnormal Appetite                               | text                                                                                                                                                                                                                                                                                                                                                                                                                                                                                                                                                                  |   |                       |          |            |                       |          |   |                       |           |   |                       |          |   |                       |          |   |                       |         |   |                       |        |   |                       |          |
|   | 204                   | [ stool_frequency_per_day ]    | Stool Frequency per day?                        | dropdown <table><tr><td>1</td><td>1</td></tr><tr><td>2</td><td>2</td></tr><tr><td>3</td><td>3</td></tr><tr><td>4</td><td>4</td></tr><tr><td>5</td><td>5</td></tr><tr><td>6</td><td>6</td></tr></table>                                                                                                                                                                                                                                                                                                                                                                | 1 | 1                     | 2        | 2          | 3                     | 3        | 4 | 4                     | 5         | 5 | 6                     | 6        |   |                       |          |   |                       |         |   |                       |        |   |                       |          |
| 1 | 1                     |                                |                                                 |                                                                                                                                                                                                                                                                                                                                                                                                                                                                                                                                                                       |   |                       |          |            |                       |          |   |                       |           |   |                       |          |   |                       |          |   |                       |         |   |                       |        |   |                       |          |
| 2 | 2                     |                                |                                                 |                                                                                                                                                                                                                                                                                                                                                                                                                                                                                                                                                                       |   |                       |          |            |                       |          |   |                       |           |   |                       |          |   |                       |          |   |                       |         |   |                       |        |   |                       |          |
| 3 | 3                     |                                |                                                 |                                                                                                                                                                                                                                                                                                                                                                                                                                                                                                                                                                       |   |                       |          |            |                       |          |   |                       |           |   |                       |          |   |                       |          |   |                       |         |   |                       |        |   |                       |          |
| 4 | 4                     |                                |                                                 |                                                                                                                                                                                                                                                                                                                                                                                                                                                                                                                                                                       |   |                       |          |            |                       |          |   |                       |           |   |                       |          |   |                       |          |   |                       |         |   |                       |        |   |                       |          |
| 5 | 5                     |                                |                                                 |                                                                                                                                                                                                                                                                                                                                                                                                                                                                                                                                                                       |   |                       |          |            |                       |          |   |                       |           |   |                       |          |   |                       |          |   |                       |         |   |                       |        |   |                       |          |
| 6 | 6                     |                                |                                                 |                                                                                                                                                                                                                                                                                                                                                                                                                                                                                                                                                                       |   |                       |          |            |                       |          |   |                       |           |   |                       |          |   |                       |          |   |                       |         |   |                       |        |   |                       |          |
|   | 205                   | [ using_an_android_phone ]     | Are you using an Android Phone?                 | yesno <table><tr><td>1</td><td>Yes</td></tr><tr><td>0</td><td>No</td></tr></table>                                                                                                                                                                                                                                                                                                                                                                                                                                                                                    | 1 | Yes                   | 0        | No         |                       |          |   |                       |           |   |                       |          |   |                       |          |   |                       |         |   |                       |        |   |                       |          |
| 1 | Yes                   |                                |                                                 |                                                                                                                                                                                                                                                                                                                                                                                                                                                                                                                                                                       |   |                       |          |            |                       |          |   |                       |           |   |                       |          |   |                       |          |   |                       |         |   |                       |        |   |                       |          |
| 0 | No                    |                                |                                                 |                                                                                                                                                                                                                                                                                                                                                                                                                                                                                                                                                                       |   |                       |          |            |                       |          |   |                       |           |   |                       |          |   |                       |          |   |                       |         |   |                       |        |   |                       |          |
|   | 206                   | [ are_you_on_social_media ]    | Are you on Social Media?                        | yesno <table><tr><td>1</td><td>Yes</td></tr><tr><td>0</td><td>No</td></tr></table>                                                                                                                                                                                                                                                                                                                                                                                                                                                                                    | 1 | Yes                   | 0        | No         |                       |          |   |                       |           |   |                       |          |   |                       |          |   |                       |         |   |                       |        |   |                       |          |
| 1 | Yes                   |                                |                                                 |                                                                                                                                                                                                                                                                                                                                                                                                                                                                                                                                                                       |   |                       |          |            |                       |          |   |                       |           |   |                       |          |   |                       |          |   |                       |         |   |                       |        |   |                       |          |
| 0 | No                    |                                |                                                 |                                                                                                                                                                                                                                                                                                                                                                                                                                                                                                                                                                       |   |                       |          |            |                       |          |   |                       |           |   |                       |          |   |                       |          |   |                       |         |   |                       |        |   |                       |          |
|   | 207                   | [ which_social_media ]         | Which Social Media                              | checkbox <table><tr><td>1</td><td>which_social_media__1</td><td>Facebook</td></tr><tr><td>2</td><td>which_social_media__2</td><td>Twitter</td></tr><tr><td>3</td><td>which_social_media__3</td><td>Instagram</td></tr><tr><td>4</td><td>which_social_media__4</td><td>WhatsApp</td></tr><tr><td>5</td><td>which_social_media__5</td><td>Snapchat</td></tr><tr><td>6</td><td>which_social_media__6</td><td>Youtube</td></tr><tr><td>7</td><td>which_social_media__7</td><td>TikTok</td></tr><tr><td>8</td><td>which_social_media__8</td><td>Telegram</td></tr></table> | 1 | which_social_media__1 | Facebook | 2          | which_social_media__2 | Twitter  | 3 | which_social_media__3 | Instagram | 4 | which_social_media__4 | WhatsApp | 5 | which_social_media__5 | Snapchat | 6 | which_social_media__6 | Youtube | 7 | which_social_media__7 | TikTok | 8 | which_social_media__8 | Telegram |
| 1 | which_social_media__1 | Facebook                       |                                                 |                                                                                                                                                                                                                                                                                                                                                                                                                                                                                                                                                                       |   |                       |          |            |                       |          |   |                       |           |   |                       |          |   |                       |          |   |                       |         |   |                       |        |   |                       |          |
| 2 | which_social_media__2 | Twitter                        |                                                 |                                                                                                                                                                                                                                                                                                                                                                                                                                                                                                                                                                       |   |                       |          |            |                       |          |   |                       |           |   |                       |          |   |                       |          |   |                       |         |   |                       |        |   |                       |          |
| 3 | which_social_media__3 | Instagram                      |                                                 |                                                                                                                                                                                                                                                                                                                                                                                                                                                                                                                                                                       |   |                       |          |            |                       |          |   |                       |           |   |                       |          |   |                       |          |   |                       |         |   |                       |        |   |                       |          |
| 4 | which_social_media__4 | WhatsApp                       |                                                 |                                                                                                                                                                                                                                                                                                                                                                                                                                                                                                                                                                       |   |                       |          |            |                       |          |   |                       |           |   |                       |          |   |                       |          |   |                       |         |   |                       |        |   |                       |          |
| 5 | which_social_media__5 | Snapchat                       |                                                 |                                                                                                                                                                                                                                                                                                                                                                                                                                                                                                                                                                       |   |                       |          |            |                       |          |   |                       |           |   |                       |          |   |                       |          |   |                       |         |   |                       |        |   |                       |          |
| 6 | which_social_media__6 | Youtube                        |                                                 |                                                                                                                                                                                                                                                                                                                                                                                                                                                                                                                                                                       |   |                       |          |            |                       |          |   |                       |           |   |                       |          |   |                       |          |   |                       |         |   |                       |        |   |                       |          |
| 7 | which_social_media__7 | TikTok                         |                                                 |                                                                                                                                                                                                                                                                                                                                                                                                                                                                                                                                                                       |   |                       |          |            |                       |          |   |                       |           |   |                       |          |   |                       |          |   |                       |         |   |                       |        |   |                       |          |
| 8 | which_social_media__8 | Telegram                       |                                                 |                                                                                                                                                                                                                                                                                                                                                                                                                                                                                                                                                                       |   |                       |          |            |                       |          |   |                       |           |   |                       |          |   |                       |          |   |                       |         |   |                       |        |   |                       |          |
|   | 208                   | [ follow_up_date ]             | Follow Up Date                                  | text (date_dmy)                                                                                                                                                                                                                                                                                                                                                                                                                                                                                                                                                       |   |                       |          |            |                       |          |   |                       |           |   |                       |          |   |                       |          |   |                       |         |   |                       |        |   |                       |          |
|   | 209                   | [ relocated_to_a_new_site ]    | Patient Relocated to a New Site                 | yesno <table><tr><td>1</td><td>Yes</td></tr><tr><td>0</td><td>No</td></tr></table>                                                                                                                                                                                                                                                                                                                                                                                                                                                                                    | 1 | Yes                   | 0        | No         |                       |          |   |                       |           |   |                       |          |   |                       |          |   |                       |         |   |                       |        |   |                       |          |
| 1 | Yes                   |                                |                                                 |                                                                                                                                                                                                                                                                                                                                                                                                                                                                                                                                                                       |   |                       |          |            |                       |          |   |                       |           |   |                       |          |   |                       |          |   |                       |         |   |                       |        |   |                       |          |
| 0 | No                    |                                |                                                 |                                                                                                                                                                                                                                                                                                                                                                                                                                                                                                                                                                       |   |                       |          |            |                       |          |   |                       |           |   |                       |          |   |                       |          |   |                       |         |   |                       |        |   |                       |          |
|   | 210                   | [ please_specify_site_na ]     | Please specify the site name                    | text                                                                                                                                                                                                                                                                                                                                                                                                                                                                                                                                                                  |   |                       |          |            |                       |          |   |                       |           |   |                       |          |   |                       |          |   |                       |         |   |                       |        |   |                       |          |
|   | 211                   | [ lost_to_follow_up ]          | Lost to Follow-Up                               | yesno <table><tr><td>1</td><td>Yes</td></tr><tr><td>0</td><td>No</td></tr></table>                                                                                                                                                                                                                                                                                                                                                                                                                                                                                    | 1 | Yes                   | 0        | No         |                       |          |   |                       |           |   |                       |          |   |                       |          |   |                       |         |   |                       |        |   |                       |          |
| 1 | Yes                   |                                |                                                 |                                                                                                                                                                                                                                                                                                                                                                                                                                                                                                                                                                       |   |                       |          |            |                       |          |   |                       |           |   |                       |          |   |                       |          |   |                       |         |   |                       |        |   |                       |          |
| 0 | No                    |                                |                                                 |                                                                                                                                                                                                                                                                                                                                                                                                                                                                                                                                                                       |   |                       |          |            |                       |          |   |                       |           |   |                       |          |   |                       |          |   |                       |         |   |                       |        |   |                       |          |
|   | 212                   | [ date_of_last_to_follow_up ]  | Date of Last to Follow-Up                       | text (date_dmy)                                                                                                                                                                                                                                                                                                                                                                                                                                                                                                                                                       |   |                       |          |            |                       |          |   |                       |           |   |                       |          |   |                       |          |   |                       |         |   |                       |        |   |                       |          |
|   | 213                   | [ patient_is_late ]            | Patient is Late                                 | yesno <table><tr><td>1</td><td>Yes</td></tr><tr><td>0</td><td>No</td></tr></table>                                                                                                                                                                                                                                                                                                                                                                                                                                                                                    | 1 | Yes                   | 0        | No         |                       |          |   |                       |           |   |                       |          |   |                       |          |   |                       |         |   |                       |        |   |                       |          |
| 1 | Yes                   |                                |                                                 |                                                                                                                                                                                                                                                                                                                                                                                                                                                                                                                                                                       |   |                       |          |            |                       |          |   |                       |           |   |                       |          |   |                       |          |   |                       |         |   |                       |        |   |                       |          |
| 0 | No                    |                                |                                                 |                                                                                                                                                                                                                                                                                                                                                                                                                                                                                                                                                                       |   |                       |          |            |                       |          |   |                       |           |   |                       |          |   |                       |          |   |                       |         |   |                       |        |   |                       |          |
|   | 214                   | [ date_of_demise ]             | Date of Demise                                  | text (date_dmy)                                                                                                                                                                                                                                                                                                                                                                                                                                                                                                                                                       |   |                       |          |            |                       |          |   |                       |           |   |                       |          |   |                       |          |   |                       |         |   |                       |        |   |                       |          |
|   | 215                   | [ patient_follow_up_complete ] | Section Header: <i>Form Status</i><br>Complete? | dropdown <table><tr><td>0</td><td>Incomplete</td></tr><tr><td>1</td><td>Unverified</td></tr><tr><td>2</td><td>Complete</td></tr></table>                                                                                                                                                                                                                                                                                                                                                                                                                              | 0 | Incomplete            | 1        | Unverified | 2                     | Complete |   |                       |           |   |                       |          |   |                       |          |   |                       |         |   |                       |        |   |                       |          |
| 0 | Incomplete            |                                |                                                 |                                                                                                                                                                                                                                                                                                                                                                                                                                                                                                                                                                       |   |                       |          |            |                       |          |   |                       |           |   |                       |          |   |                       |          |   |                       |         |   |                       |        |   |                       |          |
| 1 | Unverified            |                                |                                                 |                                                                                                                                                                                                                                                                                                                                                                                                                                                                                                                                                                       |   |                       |          |            |                       |          |   |                       |           |   |                       |          |   |                       |          |   |                       |         |   |                       |        |   |                       |          |
| 2 | Complete              |                                |                                                 |                                                                                                                                                                                                                                                                                                                                                                                                                                                                                                                                                                       |   |                       |          |            |                       |          |   |                       |           |   |                       |          |   |                       |          |   |                       |         |   |                       |        |   |                       |          |
